# Supplementary material for: Synthesis and ring openings of cinnamate-derived N-unfunctionalised aziridines
Source: publisher site journal article supplement (doi:10.3762/bjoc.8.199), 2012-10-12
Supplement: Additional file 1 [file 1860-5397-8-199-S1.pdf]

**Supporting Information**  
**for**  
**Synthesis and ring openings of cinnamate-derived**  
**N-unfunctionalised aziridines**

Alan Armstrong\*, Alexandra Ferguson

Address: Department of Chemistry, Imperial College London, South Kensington, London,  
SW7 2AZ, U.K.

Email: Alan Armstrong\* - [A.Armstrong@imperial.ac.uk](mailto:A.Armstrong@imperial.ac.uk)

\*Corresponding author

**Experimental procedures and characterisation data for all new *NH*-aziridines,  
including  $^1\text{H}$  and  $^{13}\text{C}$  NMR spectra for all new compounds**

**Contents**

|     |                                                                |
|-----|----------------------------------------------------------------|
| S2  | General experimental                                           |
| S2  | Experimental details                                           |
| S2  | Synthesis of enoates <b>3a–j</b>                               |
| S6  | Synthesis of aziridines <b>1a–j</b>                            |
| S11 | Ring-opening products <b>2a–i</b>                              |
| S16 | NMR spectra of compounds <b>3a</b> , <b>1b–j</b> , <b>2a–i</b> |
| S53 | Crystal structure of aziridine <b>1a</b>                       |
| S54 | References                                                     |

## General experimental

Methylene chloride, toluene, methanol and THF were purified by passage through an alumina column before use. Indole was purified by passage through a silica column and stored in a desiccator. DppONH<sub>2</sub> was prepared and stored in a desiccator. NaOH was ground to a fine powder immediately prior to use. All other commercial reagents were used as supplied. Reactions were run under a positive pressure of argon in oven- or flame-dried glassware with magnetic stirring. Reaction temperatures were recorded as bath temperatures. Flash column chromatography was carried out by using silica gel, particle size 40–60 µm. Analytical thin layer chromatography (TLC) was performed by using glass-backed plates precoated with silica gel 60 F254. Melting points were obtained using a hotplate microscope and are uncorrected. Infrared analyses were recorded using ATR. NMR analyses were recorded at 400 or 500 MHz in CDCl<sub>3</sub> or MeOD-*d*<sub>4</sub> as specified. Chemical shifts are quoted in ppm relative to TMS (as referenced to the residual solvent, e.g., CHCl<sub>3</sub> δH 7.26 or CDCl<sub>3</sub> δC 77.0), with coupling constants quoted in hertz and reported to the nearest 0.1 Hz. <sup>13</sup>C assignments, when given, are based on DEPT 135 experiments. Mass spectrometry analyses were carried out by using CI<sup>+</sup> (NH<sub>3</sub>), ES<sup>+</sup> or EI.

## Experimental details

### Synthesis of enoates 3a–j

#### General procedure A:

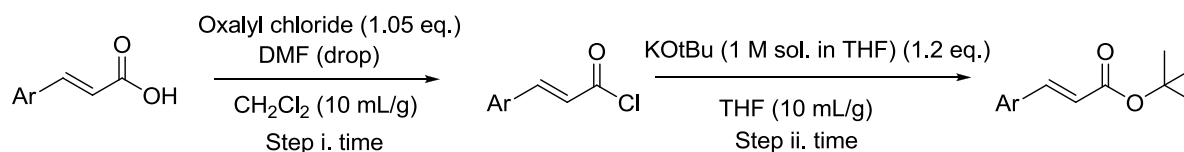

Oxalyl chloride (1.05 equiv) was added dropwise to the required cinnamic acid (1 equiv) in CH<sub>2</sub>Cl<sub>2</sub> (10 mL/g), followed by a drop of DMF. Once all the starting acid had been consumed (TLC analysis of an aliquot after a MeOH quench), the solvent was removed *in vacuo*. THF (10 mL/g) was added and the mixture cooled to 0 °C. KOt-Bu (1M solution in THF, 1.2 equiv) was added. After 10 min at 0 °C, the ice bath was removed and the reaction mixture stirred at rt. Once TLC analysis showed consumption of starting acid chloride, the reaction was diluted with diethyl ether (30 mL/g) and washed with water (30 mL/g). The aqueous phase was extracted with diethyl ether (3 × 30 mL/g), and the combined organic phases were dried over MgSO<sub>4</sub> and concentrated *in vacuo*.

**(E)-tert-Butyl cinnamate (3b)**

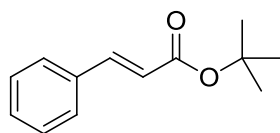

Following general procedure A; time for step i.: 2 h.; time for step ii.: 16 h. 3.62 g of cinnamic acid provided the title compound as a yellow oil (4.49 g, 90%) with no need for purification.  $R_f$  0.35 (UV 254 nm, petroleum ether/EtOAc, 20:1);  $\delta_H$  ( $CDCl_3$ , 400 MHz) 7.60 (1H, d,  $J$  16.0, PhCH), 7.56–7.52 (2H, ArH), 7.43–7.38 (3H, ArH), 6.42 (1H, d,  $J$  16.0,  $t$ -BuOC(O)CH), 1.55 (9H, s, C(CH<sub>3</sub>)<sub>3</sub>). All data are in agreement with literature values [1].

**(E)-tert-Butyl 4-methoxycinnamate (3c)**

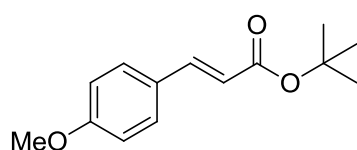

Following general procedure A; time for step i.: 30 min; time for step ii.: 16 h. 0.50 g of 4-methoxycinnamic acid provided the title compound as a white powdery solid (0.43 g, 65%), after purification by column chromatography on silica: petroleum ether/EtOAc (20:1). Mp 43–44 °C [lit: 41–44 °C];  $R_f$  0.30 (UV 254 nm, petroleum ether/EtOAc, 20:1);  $\delta_H$  ( $CDCl_3$ , 400 MHz) 7.55 (1H, d,  $J$  16.0, ArCH), 7.47 (2H, dt,  $J$  8.8 and 2.0, OCH<sub>3</sub>CCHCH), 6.91 (2H, dt,  $J$  8.8 and 2.0, OCH<sub>3</sub>CCH), 6.25 (1H, d,  $J$  16.0,  $t$ -BuOC(O)CH), 3.86 (3H, s, OCH<sub>3</sub>), 1.55 (9H, s, C(CH<sub>3</sub>)<sub>3</sub>). All data are in agreement with literature values [2].

**(E)-tert-Butyl 4-nitrocinnamate (3d)**

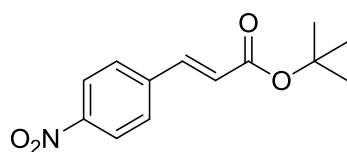

Following general procedure A; time for step i.: 50 min; time for step ii.: 4 h. 0.50 g of 4-nitrocinnamic acid provided the title compound as a brown solid (0.41 g, 63%), with no need for purification. Mp 152–55 °C [lit: 155–57 °C];  $R_f$  0.25 (UV 254 nm, petroleum ether/EtOAc, 10:1);  $\delta_H$  ( $CDCl_3$ , 400 MHz) 8.26 (2H, d,  $J$  8.4, NO<sub>2</sub>CCH), 7.67 (2H, d,  $J$  8.4, NO<sub>2</sub>CCHCH), 7.62 (1H, d,  $J$  16.0, ArCH), 6.50 (1H, d,  $J$  16.0,  $t$ -BuOC(O)CH), 1.56 (9H, s, C(CH<sub>3</sub>)<sub>3</sub>). All data are in agreement with literature values [2].

**(E)-tert-Butyl 4-methylcinnamate (3e)**

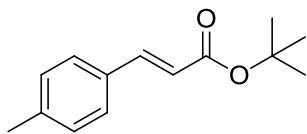

Following general procedure A; time for step i.: 50 min; time for step ii.: 4 h. 0.50 g of 4-methylcinnamic acid provided the title compound as a brown oil (0.53 g, 79%), with no need for purification.  $R_f$  0.35 (UV 254 nm, petroleum ether/EtOAc, 10:1);  $\delta_H$  ( $CDCl_3$ , 400 MHz) 7.57 (1H, d,  $J$  16.0, ArCH), 7.42 (2H, d,  $J$  8.0,  $CH_3CCH$ ), 7.19 (2H, d,  $J$  8.0,  $CH_3CCH$ ), 6.33 (1H, d,  $J$  16.0,  $t$ -BuOC(O)CH), 2.39 (3H, s, ArCH<sub>3</sub>), 1.56 (9H, s, C(CH<sub>3</sub>)<sub>3</sub>). All data are in agreement with literature values [2].

**(E)-tert-Butyl 4-chlorocinnamate (3f)**

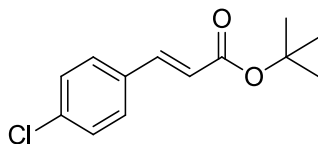

Following general procedure A; time for step i.: 1 h.; time for step ii.: 16 h. 0.50 g of 4-chlorocinnamic acid provided the title compound as a white solid (0.55 g, 84%), after purification by column chromatography on silica: petroleum ether/EtOAc (20:1). Mp 70–72 °C [lit:69–71 °C];  $R_f$  0.35 (UV 254 nm, petroleum ether/EtOAc, 20:1);  $\delta_H$  ( $CDCl_3$ , 400 MHz) 7.54 (1H, d,  $J$  15.6, ArCH), 7.46 (2H, dt,  $J$  8.8 and 2.0, ClCCH), 7.36 (2H, dt,  $J$  8.8 and 2.0, ClCCHCH), 6.35 (1H, d,  $J$  15.6,  $t$ -BuOC(O)CH), 1.56 (9H, s, C(CH<sub>3</sub>)<sub>3</sub>). All data are in agreement with literature values [2].

**(E)-tert-Butyl 3-methoxycinnamate (3g)**

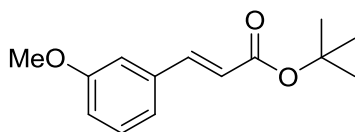

Following general procedure A; time for step i.: 1 h 30 min; time for step ii.: 4 h. 1.00 g of 3-methoxycinnamic acid provided the title compound as a yellow oil (1.32 g, quantitative yield), with no need for purification.  $R_f$  0.40 (UV 254 nm, petroleum ether/EtOAc, 20:1);  $\delta_H$  ( $CDCl_3$ , 400 MHz) 7.57 (1H, d,  $J$  16.1, ArCH), 7.30 (1H, t,  $J$  8.1, ArH), 7.11 (1H, d,  $J$  7.4, ArH), 7.03 (1H, br t,  $J$  2.4, ArH), 6.93 (1H, dd,  $J$  8.1 and 2.4, ArH), 6.37 (1H, d,  $J$  16.1, C(O)CH), 3.82 (3H, s, OCH<sub>3</sub>), 1.54 (9H, s, C(CH<sub>3</sub>)<sub>3</sub>). All data are in agreement with literature values [3].

**(E)-tert-Butyl 2-nitrocinnamate (3h)**

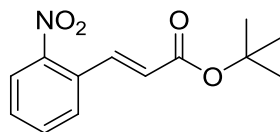

Following general procedure A; time for step i.: 2 h. then a further portion of oxalyl chloride (1.05 equiv) added, then 50 min; time for step ii.: 16 h. 1.00 g of 2-nitrocinnamic acid provided the title compound as a yellow oil (0.17 g, 13%), after purification twice by column chromatography on silica: petroleum ether/EtOAc (5:1), then petroleum ether/EtOAc (5:1).  $R_f$  0.40 (UV 254 nm, petroleum ether/EtOAc, 5:1);  $\nu_{\max}/\text{cm}^{-1}$  2990, 1736, 1704, 1524, 1332, 1145;  $\delta\text{H}$  ( $\text{CDCl}_3$ , 400 MHz) 8.01 (1H, d  $J$  15.6, ArCH), 8.01 (1H, d  $J$  7.6, ArH), 7.64 (2H, ArH), 7.55 (1H, m, ArH), 6.32 (1H, d,  $J$  15.6, ArCHCH), 1.53 (9H, s, C(CH<sub>3</sub>)<sub>3</sub>);  $\delta\text{C}$  ( $\text{CDCl}_3$ , 101 MHz) 165.0, 148.3, 138.7, 133.4, 130.7, 130.1, 129.1, 125.2, 124.8, 81.1, 28.1. All data are in agreement with literature values [4].

**(E)-tert-Butyl 3-(5-chlorofuran-2-yl)propenoate (3a)**

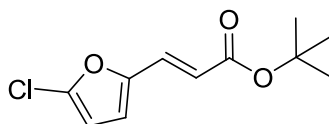

The ylide (*tert*-butoxycarbonyl-methylene)triphenylphosphorane (0.499 g, 1.3 mmol) was dissolved in THF (10 mL). 2-Chlorofuraldehyde (0.145 g, 1.1 mmol) in THF (5 mL) was added over 5 min. After 2 h, the solvent was removed *in vacuo*. Column chromatography on silica, eluting with petroleum ether/EtOAc (20:1) provided the pure product as a white crystalline solid (0.174 g, 71%). Mp 44–47 °C;  $R_f$  0.25 (UV 254 nm, petroleum ether/EtOAc, 20:1);  $\nu_{\max}/\text{cm}^{-1}$  3154, 2975, 1704, 1645, 1156;  $\delta\text{H}$  ( $\text{CDCl}_3$ , 400 MHz) 7.20 (1H, d,  $J$  15.7, CCH), 6.50 (1H, d,  $J$  3.4, ArH), 6.21 (1H, d,  $J$  15.7, C(O)CH), 6.20 (1H, d,  $J$  3.4, ArH), 1.48 (9H, s, C(CH<sub>3</sub>)<sub>3</sub>);  $\delta\text{C}$  ( $\text{CDCl}_3$ , 101 MHz) 166.0, 150.7, 138.9, 128.9, 118.3, 115.8, 109.0, 80.5, 28.1;  $m/z$  ( $\text{NH}_3$  CI<sup>+</sup>), Found:  $\text{MNH}_4^+$ , 246.0905.  $\text{C}_{11}\text{H}_{17}\text{NO}_3\text{Cl}$  requires 246.0897,  $\Delta$  3.3 ppm.

**(E)-tert-Butyl 4-iodocinnamate (3i)**

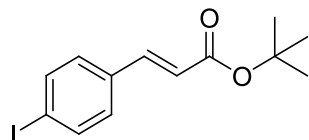

The ylide (*tert*-butoxycarbonyl-methylene)triphenylphosphorane (49 mg, 0.13 mmol) was dissolved in THF (2 mL). 4-Iodobenzaldehyde (25 mg, 0.11 mmol) in THF (1 mL) was added over 5 min. After 16 h, the solvent was removed *in vacuo* to provide the crude product as a yellow oil. Column chromatography on silica, eluting with EtOAc/petroleum ether (1:10) provided the pure product as a

pale yellow solid (28 mg, 79%). Mp 65–67 °C [lit. 65–66°C];  $R_f$  0.80 (UV 254 nm, EtOAc/petroleum ether, 1:10);  $\delta H$  (CDCl<sub>3</sub>, 400 MHz) 7.71 (2H, d,  $J$  9.0, ArCH), 7.51 (1H, d,  $J$  16.2, ArCH), 7.24 (2H, d,  $J$  9.0, ArH), 6.38 (1H, d,  $J$  16.2, C(O)CH), 1.52 (9H, s, C(CH<sub>3</sub>)<sub>3</sub>);  $m/z$  (NH<sub>3</sub> CI<sup>+</sup>), Found: MNH<sub>3</sub><sup>+</sup>, 348.0466. C<sub>13</sub>H<sub>19</sub>NO<sub>2</sub>I requires 348.0461,  $\Delta$  1.4 ppm. All data are in agreement with literature values [5].

### (*E*)-*tert*-Butyl 2-chlorocinnamate (3j)

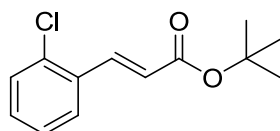

PdCl<sub>2</sub>(PPh<sub>3</sub>)<sub>2</sub> (0.118 g, 0.17 mmol) was added to a Wheaton vial. The vial was flushed with Ar (g), before the addition of Et<sub>3</sub>N (12 mL), 1-chloro-2-iodobenzene (0.200 g, 0.84 mmol) and *tert*-butyl acrylate (0.212 mL, 1.68 mmol) sequentially. The vial was sealed and heated to 115 °C. After 18 h, the heat source was removed, and NH<sub>4</sub>Cl (sat. aq., 15 mL) was added. The aqueous phase was extracted with CH<sub>2</sub>Cl<sub>2</sub> (3 × 15 mL) and the organic phase was dried over Na<sub>2</sub>SO<sub>4</sub>. The solvent was removed *in vacuo* to provide the crude product as a pale yellow solid (0.447 g). Column chromatography on silica, eluting with EtOAc/Petroleum ether (1:30) provided the pure product as yellow oil (0.186 g, 93%).  $R_f$  0.25 (UV 254 nm, petroleum ether/EtOAc, 30:1);  $\nu_{\max}/\text{cm}^{-1}$  2979, 1714, 1320, 1155;  $\delta H$  (CDCl<sub>3</sub>, 400 MHz) 8.02 (1H, d,  $J$  16.2, ArCH), 7.61–7.59 (1H, m, ArH), 7.41–7.38 (1H, ArH), 7.30–7.23 (2H, ArH), 6.38 (1H, d,  $J$  15.9), 1.54 (9H, s, C(CH<sub>3</sub>)<sub>3</sub>);  $\delta C$  (CDCl<sub>3</sub>, 101 MHz) 165.8, 139.4, 134.8, 132.9, 130.7, 130.1, 127.6, 127.0, 122.8, 80.8, 28.2;  $m/z$  (NH<sub>3</sub> CI<sup>+</sup>), Found: MNH<sub>4</sub><sup>+</sup>, 256.1100. C<sub>13</sub>H<sub>19</sub>NO<sub>2</sub>Cl requires 256.1104,  $\Delta$  1.6 ppm. All data are in agreement with literature values [6].

## Synthesis of aziridines 1a–j

### General procedure C

DppONH<sub>2</sub> [7] (3 equiv) was added to anhydrous CH<sub>2</sub>Cl<sub>2</sub> (0.12 M) in a flame-dried flask under Ar (g). NMM (3 equiv) was added dropwise over 1 min, and the reaction mixture was stirred for 30 min. NaOH (11 equiv) (ground to a fine powder immediately prior to use) was added, and the reaction mixture was stirred for a further 20 min. The required cinnamate ester (1 equiv) was then added. After 40 h stirring at rt, NH<sub>4</sub>Cl (sat. aq. 60 mL/g) was added, and the aqueous phase extracted with CH<sub>2</sub>Cl<sub>2</sub> (3 × 60 mL/g). The organic phase was dried over Na<sub>2</sub>SO<sub>4</sub>, and the solvent removed *in vacuo*.

### General procedure D

DppONH<sub>2</sub> [7] (1.04 equiv) was added to anhydrous CH<sub>2</sub>Cl<sub>2</sub> (0.24 M) in a flame-dried flask under Ar (g). NMM (1.04 equiv) was added dropwise over 1 min, and the reaction mixture was stirred for

30 min. NaOH (4 equiv) (ground to a fine powder immediately prior to use) was added, and the reaction mixture was stirred for a further 20 min. The required cinnamate ester (1 equiv) was then added. After 40 h stirring at rt, NH<sub>4</sub>Cl (sat. aq. 60 mL/g) was added and the aqueous phase extracted with CH<sub>2</sub>Cl<sub>2</sub> (3 × 60 mL/g). The organic phase was dried over Na<sub>2</sub>SO<sub>4</sub> and the solvent removed *in vacuo*.

### 3-Phenylaziridine-2-carboxylic acid *tert*-butylester (1a)

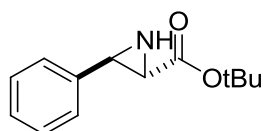

NMM (0.94 mL, 8.6 mmol) was added dropwise over 1 min to a suspension of DppONH<sub>2</sub> (2.00 g, 8.6 mmol) in CH<sub>2</sub>Cl<sub>2</sub> (24 mL), and the reaction mixture was stirred for 30 min. NaOH (1.26 g, 31.4 mmol) (ground to a fine powder immediately prior to use) was added, and the reaction mixture was stirred for a further 20 min. *tert*-Butyl cinnamate (0.58 g, 2.9 mmol) was then added. After 40 h of stirring at rt, NH<sub>4</sub>Cl (sat., aq., 40 mL) was added and the aqueous phase extracted with CH<sub>2</sub>Cl<sub>2</sub> (3 × 30 mL). The organic phase was dried over Na<sub>2</sub>SO<sub>4</sub> and the solvent removed *in vacuo*. Purification by column chromatography on silica: petroleum ether/EtOAc (10:1) provided the title compound as a white crystalline solid (0.40 g, 65%). Mp 63–66 °C; R<sub>f</sub> 0.20 (petroleum ether/EtOAc, 10:1); δ<sub>H</sub> (CDCl<sub>3</sub>, 400 MHz) 7.34–7.27 (5H, PhH), 3.17 (1H, br s, CHNH), 2.50 (1H, br s, CHNH), 1.82 (1H, br s, NH), 1.50 (9H, s, C(CH<sub>3</sub>)<sub>3</sub>); δ<sub>C</sub> (CDCl<sub>3</sub>, 101 MHz) 170.8, 138.2, 128.4, 127.7, 126.2, 82.4, 40.4, 39.9, 28.1. All data are in agreement with literature values [7]. A crystal structure was obtained for aziridine **1a**; see [crystallographic data](#).

### 3-(4-Methoxyphenyl)aziridine-2-carboxylic acid *tert*-butylester (1b)

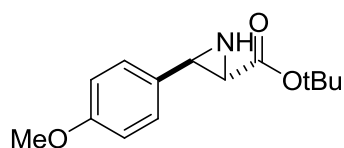

Following general procedure C, 4-methoxy-*tert*-butyl cinnamate (50 mg) provided the title compound as a pale yellow powder (21 mg, 39%) after purification by column chromatography on silica: petroleum ether/EtOAc (10:1). Mp 79–81 °C; R<sub>f</sub> 0.40 (KMnO<sub>4</sub> dip, petroleum ether/EtOAc, 10:1); ν<sub>max</sub>/cm<sup>-1</sup> 3291, 2986, 2947, 1715; δ<sub>H</sub> (CDCl<sub>3</sub>, 400 MHz) 7.21 (2H, dt, *J* 8.7 and 2.6, ArH), 6.87 (2H, dt, *J* 8.7 and 2.6, ArH), 3.82 (3H, s, OCH<sub>3</sub>), 3.14 (1H, dd, *J* 7.6 and 2.4, CHNH), 2.47 (1H, dd, *J* 7.6 and 2.4, CHNH), 1.78 (1H, br t, *J* 7.6, CHNH), 1.53 (9H, s, C(CH<sub>3</sub>)<sub>3</sub>); δ<sub>C</sub> (CDCl<sub>3</sub>, 101 MHz) 170.9, 159.3, 130.2, 127.3, 113.9, 82.2, 55.3, 40.3, 39.6, 28.1; *m/z* (electrospray), Found: MNa<sup>+</sup>, 272.1269. C<sub>14</sub>H<sub>19</sub>NO<sub>3</sub>Na requires 272.1263, Δ 2.2 ppm.

### 3-(4-Methylphenyl)aziridine-2-carboxylic acid *tert*-butylester (1c)

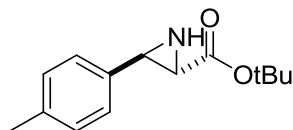

Following general procedure C, 4-methyl-*tert*-butyl cinnamate (50 mg) provided the title compound as a white powder (19 mg, 36%) after purification by column chromatography on silica: petroleum ether/EtOAc (50:1 to 10:1). Mp 62-65 °C;  $R_f$  0.25 (KMnO<sub>4</sub> dip, petroleum ether/EtOAc, 10:1);  $\nu_{\max}/\text{cm}^{-1}$  3275, 2981, 2933, 1714;  $\delta\text{H}$  (CDCl<sub>3</sub>, 400 MHz) 7.21–7.14 (4H, m, ArH), 3.14 (1H, dd, 8.8 and 2.7, CHNH), 2.48 (1H, dd,  $J$  8.8 and 2.7, CHNH), 2.36 (3H, s, CH<sub>3</sub>), 1.80 (1H, br t,  $J$  8.8, CHNH), 1.52 (9H, s, C(CH<sub>3</sub>)<sub>3</sub>);  $\delta\text{C}$  (CDCl<sub>3</sub>, 101 MHz) 170.9, 137.4, 135.2, 129.1, 126.0, 82.3, 40.4, 39.8, 28.1, 21.1;  $m/z$  (NH<sub>3</sub>, CI), Found: MH<sup>+</sup>, 234.1505. C<sub>14</sub>H<sub>20</sub>NO<sub>2</sub> requires 234.1494,  $\Delta$  4.7 ppm.

### 3-(2-Chlorophenyl)aziridine-2-carboxylic acid *tert*-butylester (1g)

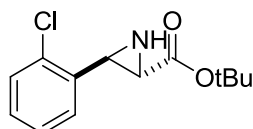

Following general procedure C, 2-chloro-*tert*-butyl cinnamate (50 mg) provided the title compound as a clear oil (25 mg, 47%) after purification by column chromatography on silica: petroleum ether/EtOAc (30:1 to 20:1).  $R_f$  0.20 (UV 254 nm, EtOAc/petroleum ether, 1:20);  $\nu_{\max}/\text{cm}^{-1}$  3293, 2982, 1729, 1229, 1161;  $\delta\text{H}$  (CDCl<sub>3</sub>, 400 MHz) 7.35–7.33 (2H, m, ArH), 7.24–7.17 (2H, m, ArH), 3.45 (1H, br s, ArCH), 2.39 (1H, br s, C(O)CH), 1.74 (1H, br s, NH), 1.51 (9H, s, C(CH<sub>3</sub>)<sub>3</sub>);  $\delta\text{C}$  (CDCl<sub>3</sub>, 101 MHz) 170.7, 135.8, 134.2, 129.0, 128.6, 127.2, 126.9, 82.4, 39.4, 37.8, 28.1;  $m/z$  (NH<sub>3</sub> CI<sup>+</sup>), Found: MH<sup>+</sup>, 254.0947. C<sub>13</sub>H<sub>17</sub>NO<sub>2</sub>Cl requires 254.0948,  $\Delta$  0.4 ppm.

### 3-(3-Methoxyphenyl)aziridine-2-carboxylic acid *tert*-butylester (1i)

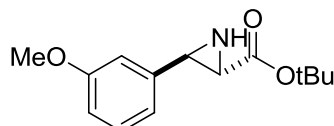

Following general procedure C, 3-methoxy-*tert*-butyl cinnamate (50 mg) provided the title compound as a clear oil (17 mg, 32%) after purification by column chromatography on silica: petroleum ether/EtOAc (20:1 to 10:1).  $R_f$  0.20 (UV 254 nm, EtOAc/petroleum ether, 1:10);  $\nu_{\max}/\text{cm}^{-1}$  2987, 1719, 1234, 1156;  $\delta\text{H}$  (CDCl<sub>3</sub>, 400 MHz) 7.25–7.20 (1H, m, ArCH), 6.89 (1H, d,  $J$  7.3, ArH), 6.83–6.80 (2H, ArH), 3.80 (3H, s, OCH<sub>3</sub>), 3.15 (1H, d,  $J$  2.3 ArCH), 2.50 (1H, d,  $J$  2.3,



C(O)CH), 1.74 (1H, br s, NH), 1.50 (9H, s, C(CH<sub>3</sub>)<sub>3</sub>);  $\delta$ C (CDCl<sub>3</sub>, 101 MHz) 170.7, 159.8, 139.9, 129.4, 118.7, 113.6, 111.1, 82.3, 55.3, 40.4, 39.9, 28.1;  $m/z$  (NH<sub>3</sub> CI+), Found: MH<sup>+</sup>, 250.1441. C<sub>14</sub>H<sub>20</sub>NO<sub>3</sub> requires 250.1441,  $\Delta$  0 ppm.

### 3-(4-Iodophenyl)aziridine-2-carboxylic acid *tert*-butylester (1d)

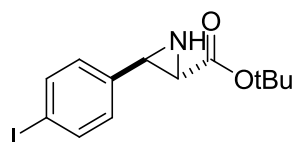

Following general procedure D, 4-iodo-*tert*-butyl cinnamate (50 mg) provided the title compound as a white solid (17 mg, 33%) after purification by column chromatography on silica: petroleum ether/EtOAc (30:1 to 20:1). Mp 83–85 °C;  $R_f$  0.40 (UV 254 nm, EtOAc/petroleum ether, 1:20);  $\nu_{\max}/\text{cm}^{-1}$  3273, 2979, 1717, 1360, 1151;  $\delta$ H (CDCl<sub>3</sub>, 400 MHz) 7.64 (2H, d,  $J$  8.5, ArH), 7.03 (2H, d,  $J$  8.5, ArH), 3.11 (1H, d,  $J$  2.0, ArCH), 2.44 (1H, d,  $J$  2.0, C(O)CH), 1.76 (1H, br s, NH), 1.49 (9H, s, C(CH<sub>3</sub>)<sub>3</sub>);  $\delta$ C (CDCl<sub>3</sub>, 101 MHz) 170.5, 138.0, 137.4, 128.1, 93.0, 82.6, 40.5, 39.4, 28.1;  $m/z$  (NH<sub>3</sub> CI+), Found: MH<sup>+</sup>, 346.0295. C<sub>13</sub>H<sub>17</sub>NO<sub>2</sub>I requires 346.0304,  $\Delta$  2.6 ppm.

### 3-(4-Chloro)phenylaziridine-2-carboxylic acid *tert*-butylester (1e)

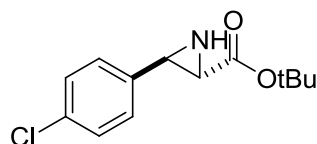

Following general procedure D, 4-chloro-*tert*-butyl cinnamate (57 mg) provided the title compound as a white oil (32 mg, 53%) after purification by column chromatography on silica: petroleum ether/EtOAc (15:1).  $R_f$  0.35 (KMnO<sub>4</sub> dip, petroleum ether/EtOAc, 15:1);  $\nu_{\max}/\text{cm}^{-1}$  3289, 2984, 2933, 1723;  $\delta$ H (CDCl<sub>3</sub>, 400 MHz) 7.33–7.29 (2H, m, ArH), 7.26–7.23 (2H, m, ArH), 3.16 (1H, br d,  $J$  4.8, CHNH), 2.48 (1H, br s, CHNH), 1.86 (1H, br s, CHNH), 1.53 (9H, s, C(CH<sub>3</sub>)<sub>3</sub>);  $\delta$ C (CDCl<sub>3</sub>, 101 MHz) 170.5, 136.8, 133.4, 128.5, 127.5, 82.5, 40.5, 39.2, 28.1;  $m/z$  (NH<sub>3</sub> chemical), Found: MH<sup>+</sup>, 254.0952. C<sub>13</sub>H<sub>17</sub>NO<sub>2</sub>Cl requires 254.0948,  $\Delta$  1.6 ppm.

### 3-(4-Nitrophenyl)aziridine-2-carboxylic acid *tert*-butylester (1f)

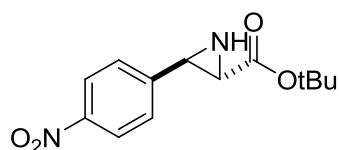

Following general procedure D, 4-nitro-*tert*-butyl cinnamate (63 mg) provided the title compound as a yellow powder (51 mg, 76%) after purification by column chromatography on silica: petroleum

ether/EtOAc (5:1). Mp 90-92 °C;  $R_f$  0.25 (KMnO<sub>4</sub> dip, petroleum ether/EtOAc, 5:1);  $\nu_{\max}/\text{cm}^{-1}$  3281, 2984, 2972, 1709;  $\delta_{\text{H}}$  (CDCl<sub>3</sub>, 400 MHz) 8.22–8.19 (2H, m, ArH), 7.50–7.46 (2H, m, ArH), 3.27 (1H, br s, CHNH), 2.52 (1H, br s, CHNH), 1.97 (1H, br s, CHNH), 1.54 (9H, s, C(CH<sub>3</sub>)<sub>3</sub>);  $\delta_{\text{C}}$  (CDCl<sub>3</sub>, 101 MHz) 169.9, 147.5, 145.8, 127.1, 123.7, 83.0, 41.0, 39.0, 28.0;  $m/z$  (NH<sub>3</sub>, CI+), Found: MH<sup>+</sup>, 265.1196. C<sub>13</sub>H<sub>17</sub>N<sub>2</sub>O<sub>4</sub> requires 265.1188,  $\Delta$  3.0 ppm.

### 3-(2-Nitrophenyl)aziridine-2-carboxylic acid *tert*-butylester (1h)

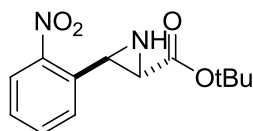

Following general procedure D, 2-nitro-*tert*-butyl cinnamate (50 mg) provided the title compound as a white oil (21 mg, 40%) after purification by column chromatography on silica: petroleum ether/EtOAc (10:1).  $R_f$  0.40 (UV 254 nm, EtOAc/petroleum ether, 1:10);  $\nu_{\max}/\text{cm}^{-1}$  3298, 2991, 1722, 1525, 1346;  $\delta_{\text{H}}$  (CDCl<sub>3</sub>, 400 MHz) 8.09 (1H, dd,  $J$  8.4 and 1.0, ArH), 7.74 (1H, d,  $J$  7.5, ArH), 7.62 (1H, t,  $J$  7.5, ArH), 7.45 (1H, t,  $J$  8.4, ArH), 3.69 (1H, d,  $J$  5.8, ArCH), 2.41 (1H, d,  $J$  5.8, C(O)CH), 1.86 (1H, m, NH), 1.53 (9H, s, C(CH<sub>3</sub>)<sub>3</sub>);  $\delta_{\text{C}}$  (CDCl<sub>3</sub>, 101 MHz) 170.4, 148.7, 134.0, 133.8, 128.9, 128.3, 124.7, 82.7, 39.5, 38.1, 28.0;  $m/z$  (NH<sub>3</sub>, CI+), Found: MH<sup>+</sup>, 265.1190. C<sub>13</sub>H<sub>17</sub>N<sub>2</sub>O<sub>4</sub> requires 265.1188,  $\Delta$  0.8 ppm.

### 3-(5-Chlorofuran-2-yl)aziridine-2-carboxylic acid *tert*-butylester (1j)

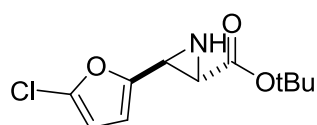

Following general procedure D, quenching the reaction after 20 h, 5-chloro-*tert*-butyl furfural (50 mg) provided the title compound as a yellow oil (19 mg, 35%) after purification by column chromatography on silica: petroleum ether/EtOAc (10:1).  $R_f$  0.25 (UV 254 nm, petroleum ether/EtOAc, 10:1);  $\nu_{\max}/\text{cm}^{-1}$  2987, 1722, 1531, 1233, 1158;  $\delta_{\text{H}}$  (CDCl<sub>3</sub>, 400 MHz) 6.27 (1H, d,  $J$  3.1, ArH), 6.09 (1H, d,  $J$  3.1, ArH), 3.15 (1H, dd,  $J$  9.1 and 2.3, CHN), 2.76 (1H, dd,  $J$  9.1 and 2.3, CHN), 1.75 (1H, br t,  $J$  9.1, NH), 1.50 (9H, s, C(CH<sub>3</sub>)<sub>3</sub>);  $\delta_{\text{C}}$  (CDCl<sub>3</sub>, 101 MHz) 170.1, 150.9, 135.7, 109.6, 107.1, 82.8, 37.6, 33.7, 28.0;  $m/z$  (ESI+), Found: MH<sub>3</sub>O<sup>+</sup>, 262.0832. C<sub>11</sub>H<sub>17</sub>NO<sub>4</sub>Cl requires 262.0846,  $\Delta$  5.3 ppm.

## Ring-opening products 2a–i

### *tert*-Butyl 2-amino-3-phenyl-3-(indol-3-yl)propanoate (2a)

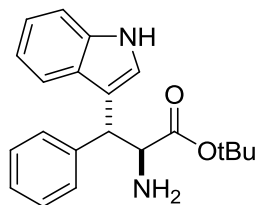

Aziridine **1a** (25 mg, 0.11 mmol) and indole (27 mg, 0.23 mmol) were dissolved in CH<sub>2</sub>Cl<sub>2</sub> (1 mL), and cooled to 0 °C. BF<sub>3</sub>·THF (19 µl, 0.17 mmol) was added over 30 s. The mixture was stirred at 0 °C for 5 min, before warming to rt, and after 24 h, the reaction was quenched with NaHCO<sub>3</sub> (5 mL). The aqueous phase was extracted with CH<sub>2</sub>Cl<sub>2</sub> (3 × 5 mL), dried over Na<sub>2</sub>SO<sub>4</sub>, and concentrated *in vacuo* to provide the crude product as yellow oil (59 mg). Column chromatography eluting with petroleum ether/EtOAc (3:2) provided the pure product as a white solid (24 mg, 63%). Mp 167–169 °C, [lit: 175–176 °C [8]] R<sub>f</sub> 0.10 (UV 254 nm, petroleum ether/EtOAc, 3:2); ν<sub>max</sub>/cm<sup>-1</sup> 3419, 2962, 2928, 2547, 1722; δ<sub>H</sub> (CDCl<sub>3</sub>, 500 MHz) 8.22 (1H, br s, ArNH), 7.49 (1H, d, *J* 8.0, ArH), 7.40 (2H, d, *J* 7.5, ArH), 7.33–7.25 (4H, ArH), 7.23 (1H, tt, *J* 7.5 and 1.5, ArH), 7.17 (1H, m, ArH), 7.06 (1H, m, ArH), 4.65 (1H, d, *J* 6.5, ArCH), 4.20 (1H, br s, NH<sub>2</sub>CH), 1.72 (2H, br s, NH<sub>2</sub>), 1.26 (9H, s, C(CH<sub>3</sub>)<sub>3</sub>); δ<sub>C</sub> (CDCl<sub>3</sub>, 101 MHz) 173.7, 140.6, 136.1, 129.0, 128.4, 127.0, 126.8, 122.3, 122.0, 119.4, 119.4, 116.6, 111.0, 81.2, 59.5, 47.3, 27.8; *m/z* (NH<sub>3</sub>, CI<sup>+</sup>), Found: MH<sup>+</sup>, 337.1916. C<sub>21</sub>H<sub>25</sub>N<sub>2</sub>O<sub>2</sub> requires 337.1916, Δ 0 ppm.

### Phenylalanine-*tert*-butyl ester (2b)

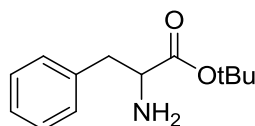

Aziridine **1a** (25 mg, 0.11 mmol) and Pd/C (5 mg, 20% w/w) were added to MeOH (1 mL). The flask was evacuated and refilled with H<sub>2</sub> (g), and the reaction mixture was stirred under a H<sub>2</sub> atmosphere. After 3 h, the Pd/C was removed by filtration, and the filtrate washed with CH<sub>2</sub>Cl<sub>2</sub> (10 mL). The solvent was removed *in vacuo* to provide the pure product as a clear oil (24 mg, 95%). R<sub>f</sub> 0.45 (UV 254 nm, EtOAc/MeOH, 20%); ν<sub>max</sub>/cm<sup>-1</sup> 3388, 2984, 1730; δ<sub>H</sub> (CDCl<sub>3</sub>, 400 MHz) 7.31–7.20 (5H, ArH), 3.63 (1H, br t, *J* 6.2, NH<sub>2</sub>CH), 3.06 (1H, dd, *J* 13.8 and 6.2, ArCHH), 2.87 (1H, dd, *J* 13.8 and 8.0, ArCHH), 1.52 (2H, br s, NH<sub>2</sub>), 1.42 (9H, s, C(CH<sub>3</sub>)<sub>3</sub>); δ<sub>C</sub> (CDCl<sub>3</sub>, 101 MHz) 174.3, 137.6, 129.4, 128.4, 126.7, 81.2, 56.3, 41.3, 28.0; *m/z* (ESI<sup>+</sup>) C<sub>13</sub>H<sub>20</sub>NO<sub>2</sub> found 222 (M<sup>+</sup>), 150 (- OtBu). All data are in agreement with literature values [9].

**tert-Butyl 2-amino-3-phenyl-3-(methoxy)propanoate (2c)**

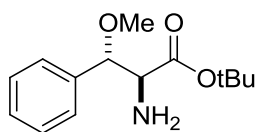

CSA (27 mg, 0.11 mmol) was added to anhydrous MeOH (1 mL) at 0 °C. After 2 min, the ice bath was removed and aziridine **1a** (25 mg, 0.11 mmol) added immediately. After 6 h, the reaction was quenched with NaHCO<sub>3</sub> (sat. aq., 5 mL). The aqueous phase was extracted with CH<sub>2</sub>Cl<sub>2</sub> (3 × 5 mL), and the combined organic phases were dried over Na<sub>2</sub>SO<sub>4</sub>. The solvent was removed *in vacuo* to provide the pure product as a clear oil (29 mg, quantitative). *R*<sub>f</sub> 0.45 (UV 254 nm, EtOAc/MeOH, 2%); *v*<sub>max</sub>/cm<sup>-1</sup> 3399, 2982, 1735, 1370, 1159;  $\delta$ H (CDCl<sub>3</sub>, 400 MHz) 7.41–7.28 (5H, ArH), 4.39 (1H, d, *J* 5.9, ArCH), 3.67 (1H, d, *J* 5.9, C(O)CH), 3.27 (3H, s, OCH<sub>3</sub>), 1.58 (2H, br s NH<sub>2</sub>), 1.42 (9H, s, C(CH<sub>3</sub>)<sub>3</sub>);  $\delta$ C (CDCl<sub>3</sub>, 101 MHz) 172.1, 137.4, 128.3, 128.3, 127.6, 85.4, 81.4, 60.5, 57.2, 28.0; *m/z* (NH<sub>3</sub>, CI<sup>+</sup>), Found: MH<sup>+</sup>, 252.1602. C<sub>14</sub>H<sub>22</sub>NO<sub>3</sub> requires 252.1600,  $\Delta$  0.8 ppm.

**tert-Butyl 2-amino-3-phenyl-3-(allyloxy)propanoate (2d)**

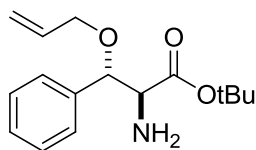

CSA (66 mg, 0.29 mmol) was added to allyl alcohol (1 mL) at 0 °C. After 2 min, the ice bath was removed and aziridine **1a** (25 mg, 0.11 mmol) added immediately. After 16 h, the reaction was quenched with NaHCO<sub>3</sub> (sat. aq., 5 mL). The aqueous phase was extracted with CH<sub>2</sub>Cl<sub>2</sub> (3 × 5 mL), and the combined organic phases were dried over Na<sub>2</sub>SO<sub>4</sub>. The solvent was removed *in vacuo* to provide the crude product as a yellow oil (30 mg). Column chromatography, eluting with EtOAc/petroleum ether (1:10) then (1:2) provided the pure product as a clear oil (18 mg, 57%). *R*<sub>f</sub> 0.25 (KMnO<sub>4</sub> dip, EtOAc/petroleum ether, 1:2); *v*<sub>max</sub>/cm<sup>-1</sup> 2984, 2867, 1737, 1368, 1156;  $\delta$ H (CDCl<sub>3</sub>, 400 MHz) 7.37–7.29 (5H, m, ArH), 5.91–5.81 (1H, m, H<sub>2</sub>C=CH), 5.25 (1H, dq, *J*<sub>trans</sub> 17.5 and 1.5, HHC=CH), 5.16 (1H, dq, *J*<sub>cis</sub> 10.4 and 1.5 HHC=CH), 4.52 (1H, d, *J* 7.2, ArCH), 3.98 (1H, ddt, *J* 12.8, 5.7 and 1.5, OCHH), 3.82 (1H, ddt, *J* 12.8, 5.7 and 1.4, OCHH), 3.66 (1H, d, *J* 6.5, NCH), 1.47 (2H, br s, NH<sub>2</sub>), 1.43 (9H, s, C(CH<sub>3</sub>)<sub>3</sub>);  $\delta$ C (CDCl<sub>3</sub>, 101 MHz) 172.3, 137.8, 134.5, 128.3, 128.3, 127.7, 116.9, 83.1, 81.4, 69.9, 60.7, 28.0; *m/z* (NH<sub>3</sub>, CI<sup>+</sup>), Found: MH<sup>+</sup>, 278.1766. C<sub>16</sub>H<sub>24</sub>NO<sub>3</sub> requires 278.1756,  $\Delta$  4.0 ppm.

***tert*-Butyl 2-amino-3-phenyl-3-(benzyloxy)propanoate (2e)**

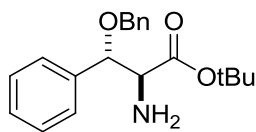

CSA (66 mg, 0.29 mmol) was added to benzyl alcohol (1 mL) at 0 °C. After 2 min of stirring, the ice bath was removed and aziridine **1a** (25 mg, 0.11 mmol) added immediately. After 16 h of stirring under Ar (g), the reaction was quenched with NaHCO<sub>3</sub> (sat. aq., 5 mL). The aqueous phase was extracted with hexane (3 × 5 mL). The organic phases were combined and washed with H<sub>2</sub>O (3 × 8 mL) and dried over Na<sub>2</sub>SO<sub>4</sub>. The solvent was removed *in vacuo*. Column chromatography, eluting with EtOAc/petroleum ether (1:5) then (1:3) provided the pure product as a clear oil (17 mg, 46%). *R*<sub>f</sub> 0.20 (UV 254 nm, EtOAc/petroleum ether, 1:3);  $\nu_{\max}/\text{cm}^{-1}$  2982, 1730, 1372, 1153;  $\delta_{\text{H}}$  (CDCl<sub>3</sub>, 400 MHz) 7.39–7.27 (10H, ArH), 4.61 (1H, d, *J* 6.5 BnOCH), 4.51 (1H, d, *J* 11.8, PhCHH), 4.35 (1H, d, *J* 11.8, PhCHH), 3.72 (1H, d, *J* 6.5, NCH), 1.67 (2H, br s, NH<sub>2</sub>), 1.41 (9H, s, C(CH<sub>3</sub>)<sub>3</sub>);  $\delta_{\text{C}}$  (CDCl<sub>3</sub>, 101 MHz) 172.0, 137.9, 137.6, 128.4, 128.4, 128.3, 127.8, 127.7, 127.6, 83.2, 81.4, 70.8, 60.7, 28.0; *m/z* (NH<sub>3</sub>, CI<sup>+</sup>), Found: MH<sup>+</sup>, 328.1903. C<sub>20</sub>H<sub>26</sub>NO<sub>3</sub> requires 328.1913,  $\Delta$  3.0 ppm.

***tert*-Butyl 2-acetylamino-3-phenyl-3-(hydroxy)propanoate (2f)**

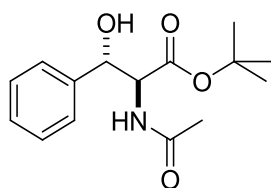

*tert*-Butyl aziridine **1a** (25 mg, 0.11 mmol) was suspended in acetic acid (2 mL) and heated to 70 °C. After 2 h, the heat source was removed and the reaction mixture cooled. The acetic acid was removed *in vacuo*, and the resulting white crystals dissolved in CH<sub>2</sub>Cl<sub>2</sub> (4 mL). The organic phase was washed with NaHCO<sub>3</sub> and the aqueous phase extracted with dichloromethane (3 × 4 mL). The organic phase was dried over MgSO<sub>4</sub> and concentrated *in vacuo* to provide the pure product (27 mg, 79%). Mp 173–174 °C; *R*<sub>f</sub> 0.20 (KMnO<sub>4</sub> dip, EtOAc/Hexane, 1:1);  $\nu_{\max}/\text{cm}^{-1}$  3357 (br), 3266, 2931, 2861, 1734 (s), 1652 (s);  $\delta_{\text{H}}$  (CDCl<sub>3</sub>, 400 MHz) 7.34–7.24 (5H, m, ArH), 6.42 (1H, d, *J* 6.7, NH), 5.26 (1H, d, *J* 3.0, ArCH), 4.90 (1H, dd, *J* 6.7 and 3.0, COCH), 4.30 (1H, br s, OH), 2.02 (3H, s, COCH<sub>3</sub>), 1.41 (9H, s, OC(CH<sub>3</sub>)<sub>3</sub>);  $\delta_{\text{C}}$  (CDCl<sub>3</sub>, 101 MHz) 171.7, 168.4, 139.5, 128.1, 127.8, 126.0, 83.4, 75.3, 59.8, 27.9, 23.0; *m/z* (NH<sub>3</sub>, CI<sup>+</sup>), Found: MH<sup>+</sup>, 280.1551. C<sub>15</sub>H<sub>22</sub>NO<sub>4</sub> requires 280.1549,  $\Delta$  0.7 ppm.

### 3-Chloro-3-phenylalanine hydrochloride (2g)

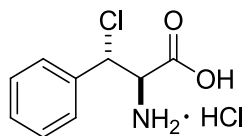

*tert*-Butyl aziridine **1a** (25 mg, 0.11 mmol) was dissolved in CH<sub>2</sub>Cl<sub>2</sub> (1 mL) and HCl (37% aq., 10 drops) added. After 20 min, a white precipitate was seen forming. After 2 h, the precipitate was filtered off and washed with CH<sub>2</sub>Cl<sub>2</sub> (4 mL). The precipitate was dried *in vacuo* for 15 min, providing the pure compound as a white flaky solid (12 mg, 45%). Mp 164–166 °C; *R*<sub>f</sub> 0.0 (UV 254 nm, petroleum ether/EtOAc, 3:1);  $\nu_{\text{max}}/\text{cm}^{-1}$  2978 (br), 2904, 1739, 1208, 820;  $\delta\text{H}$  (d<sub>6</sub>-DMSO, 400 MHz) 8.98 (2.5H, br s, OH/NH<sub>2</sub>), 7.60–7.55 (2H, ArH), 7.49–7.40 (3H, ArH), 5.86 (1H, d, *J* 4.1, ArCH), 4.59 (1H, d, 4.28), 3.86 (0.5H, br s, OH/NH<sub>2</sub>);  $\delta\text{C}$  (CD<sub>3</sub>OD, 101 MHz) 166.5, 134.4, 129.3, 128.6, 127.5, 59.3, 59.2; *m/z* (ESI+), Found: MH<sup>+</sup>, 200.0473. C<sub>9</sub>H<sub>11</sub>NO<sub>2</sub>Cl requires 200.0478,  $\Delta$  2.5 ppm.

### 3-Chloro-3-phenylalanine *tert*-butyl ester hydrochloride (2h)

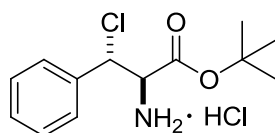

*tert*-Butyl aziridine **1a** (25 mg, 0.11 mmol) dissolved in CH<sub>2</sub>Cl<sub>2</sub> (1 mL) and HCl (2 mL, 4 M in dioxan) was added. After 30 min, the reaction solvent was removed *in vacuo* to yield the crude product as an off-white solid. Et<sub>2</sub>O (10 mL) was added, and the insoluble white solid was collected by filtration. Removal of the solvent from the solid *in vacuo* yielded the pure product as a white solid (12 mg, 36 %). *R*<sub>f</sub> 0.0 (UV 254 nm, EtOAc/MeOH 5%); m.p. 155–158 °C;  $\nu_{\text{max}}/\text{cm}^{-1}$  2967, 1729, 1264, 1154;  $\delta\text{H}$  (CD<sub>3</sub>OD, 400 MHz) 7.59 (2H, ArH), 7.52 (3H, ArH), 5.68 (1H, d, *J* 4.4, ArCH), 4.65 (1H, d, *J* 4.4, NH<sub>2</sub>CH), 1.43 (9H, s, C(CH<sub>3</sub>)<sub>3</sub>);  $\delta\text{C}$  (CD<sub>3</sub>OD, 101 MHz) 164.4, 134.8, 129.1, 128.5, 127.4, 84.8, 59.7, 59.2, 26.6; *m/z* (ESI+), Found: MH<sup>+</sup>, 256.1096. C<sub>13</sub>H<sub>19</sub>NO<sub>2</sub>Cl requires 256.1104,  $\Delta$  3.1 ppm.

### 3-Chloro-3-phenylalanine *tert*-butyl ester (2i)

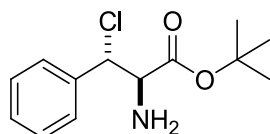

*tert*-Butyl aziridine **1a** (24 mg, 0.11 mmol) was dissolved in CH<sub>2</sub>Cl<sub>2</sub> (1 mL), and HCl (2 mL, 4 M in dioxan) was added. After 1 h, the reaction solvent was removed *in vacuo* to yield the product as the hydrochloride salt. The salt was dissolved in CH<sub>2</sub>Cl<sub>2</sub> (4 mL) and washed with NaHCO<sub>3</sub> (4 mL, sat. aq). The organic phase was dried over Na<sub>2</sub>SO<sub>4</sub> and the solvent removed *in vacuo*, to provide the title

compound as a clear oil (25 mg, 90%).  $R_f$  0.8 (UV 254 nm, EtOAc/MeOH 5%);  $\nu_{\max}/\text{cm}^{-1}$  3394, 2979, 1731, 1371, 1153;  $\delta_{\text{H}}$  ( $\text{CDCl}_3$ , 400 MHz) 7.43–7.32 (5H, ArH), 5.06 (1H, d,  $J$  7.2, ArCH), 3.87 (1H, d,  $J$  7.2, C(O)CH), 1.52 (2H, br s, NH), 1.47 (9H, s, C(CH<sub>3</sub>)<sub>3</sub>);  $\delta_{\text{C}}$  ( $\text{CDCl}_3$ , 101 MHz) 170.9, 137.3, 128.9, 128.6, 128.2, 82.3, 64.0, 62.2, 28.0;  $m/z$  ( $\text{NH}_3$ ,  $\text{CI}^+$ ), Found:  $\text{MH}^+$ , 256.1105.  $\text{C}_{13}\text{H}_{19}\text{NO}_2\text{Cl}$  requires 256.1104,  $\Delta$  0.4 ppm.

## NMR Spectra of compounds 3a, 1b–j, 2a–i

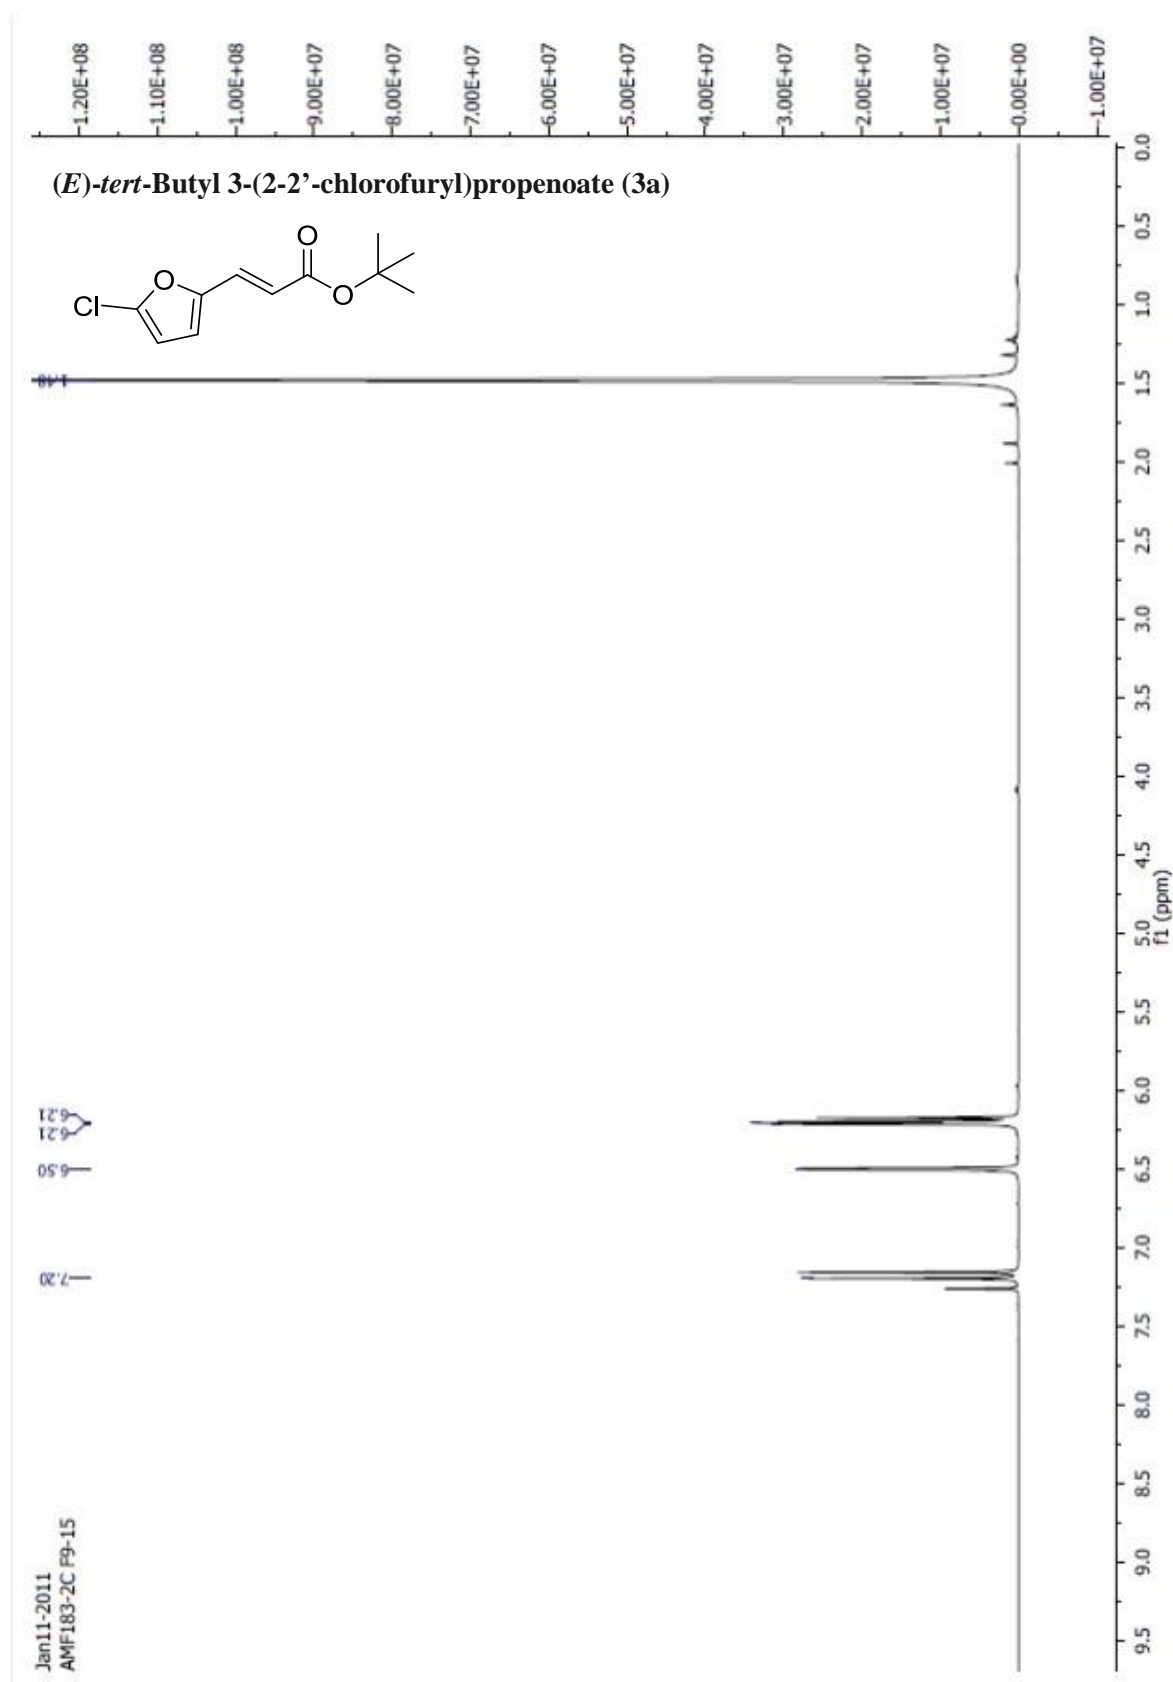



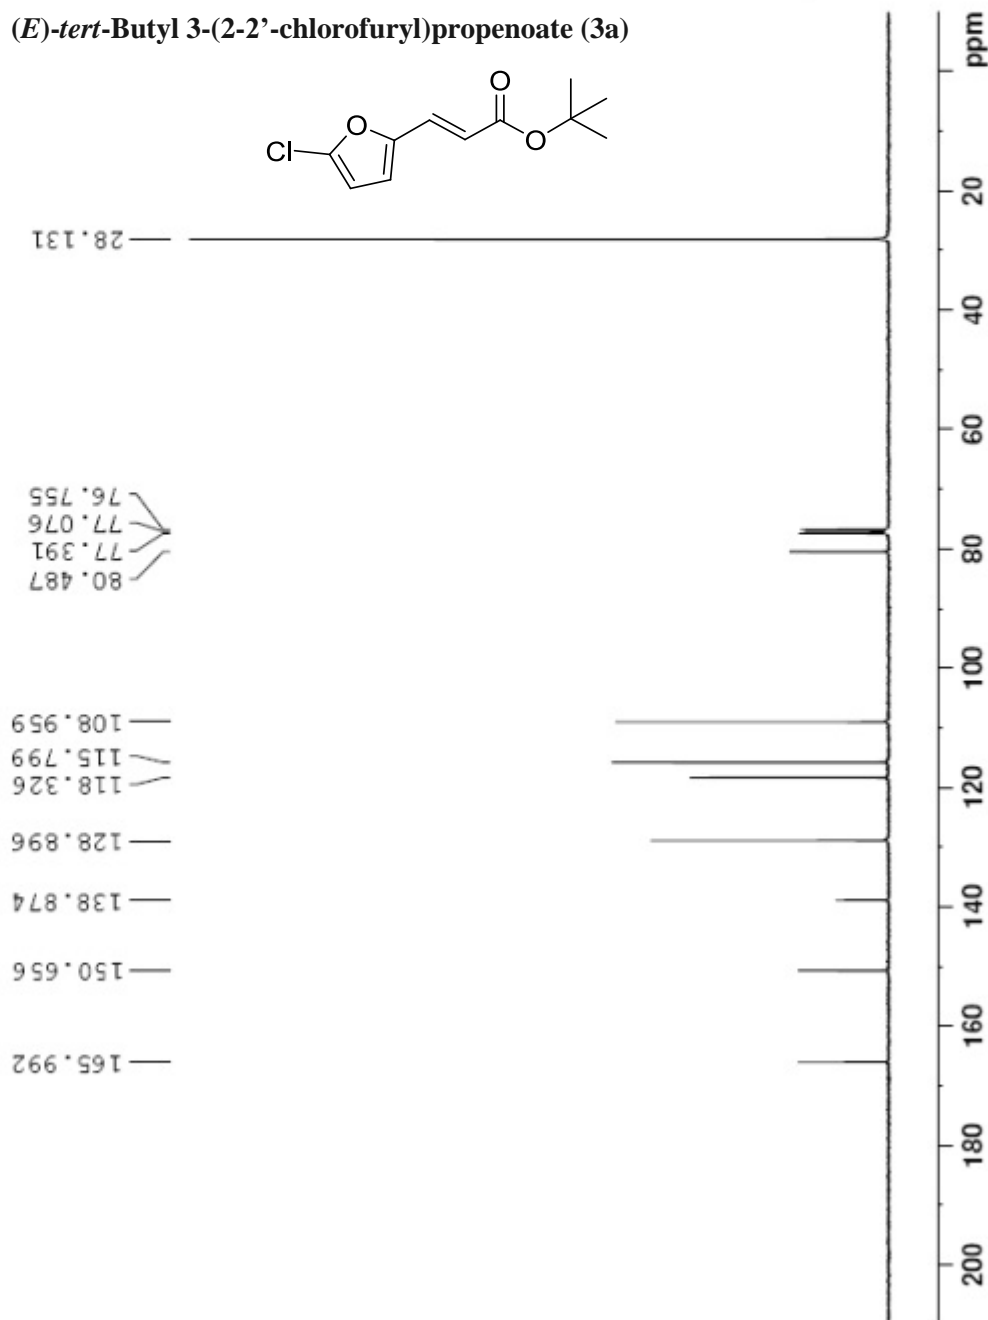

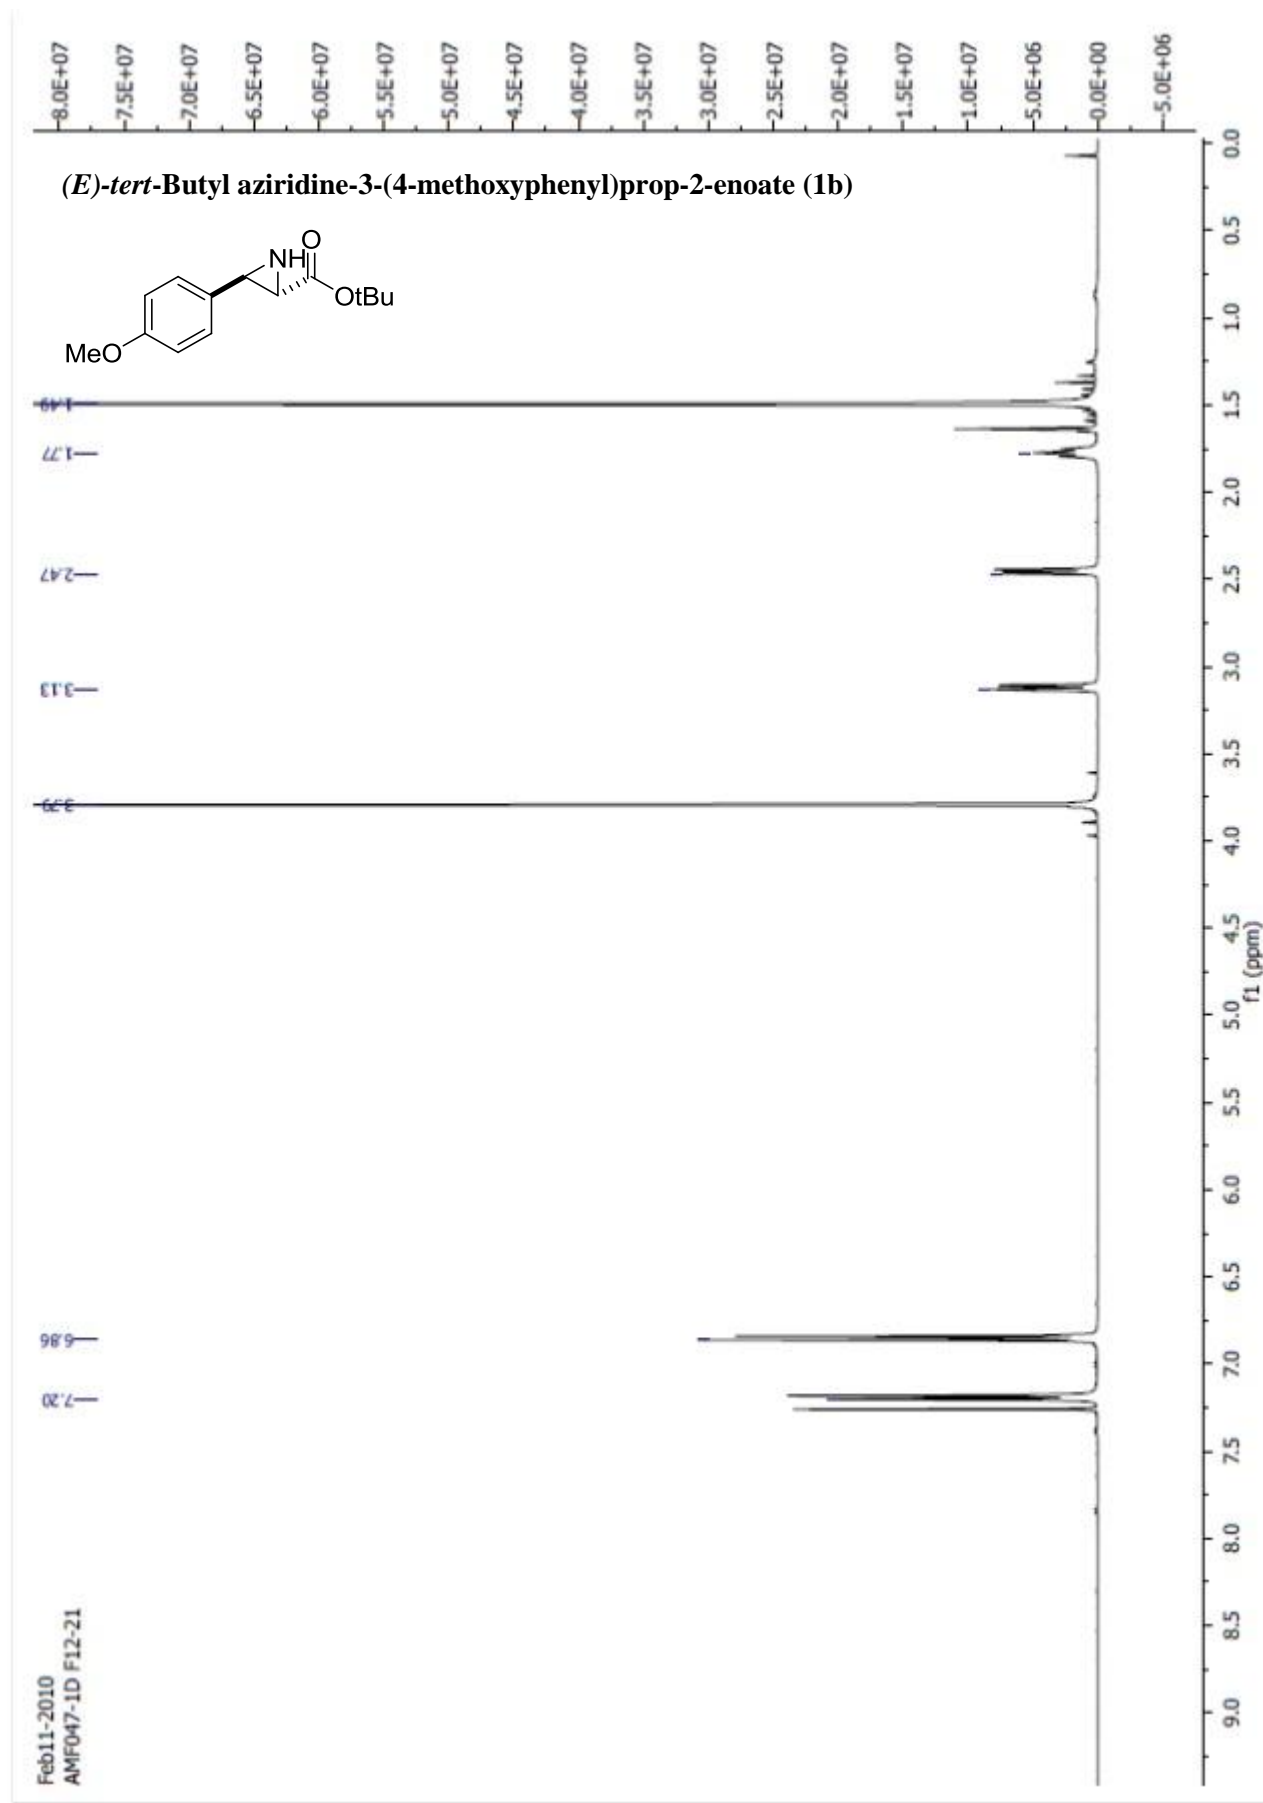

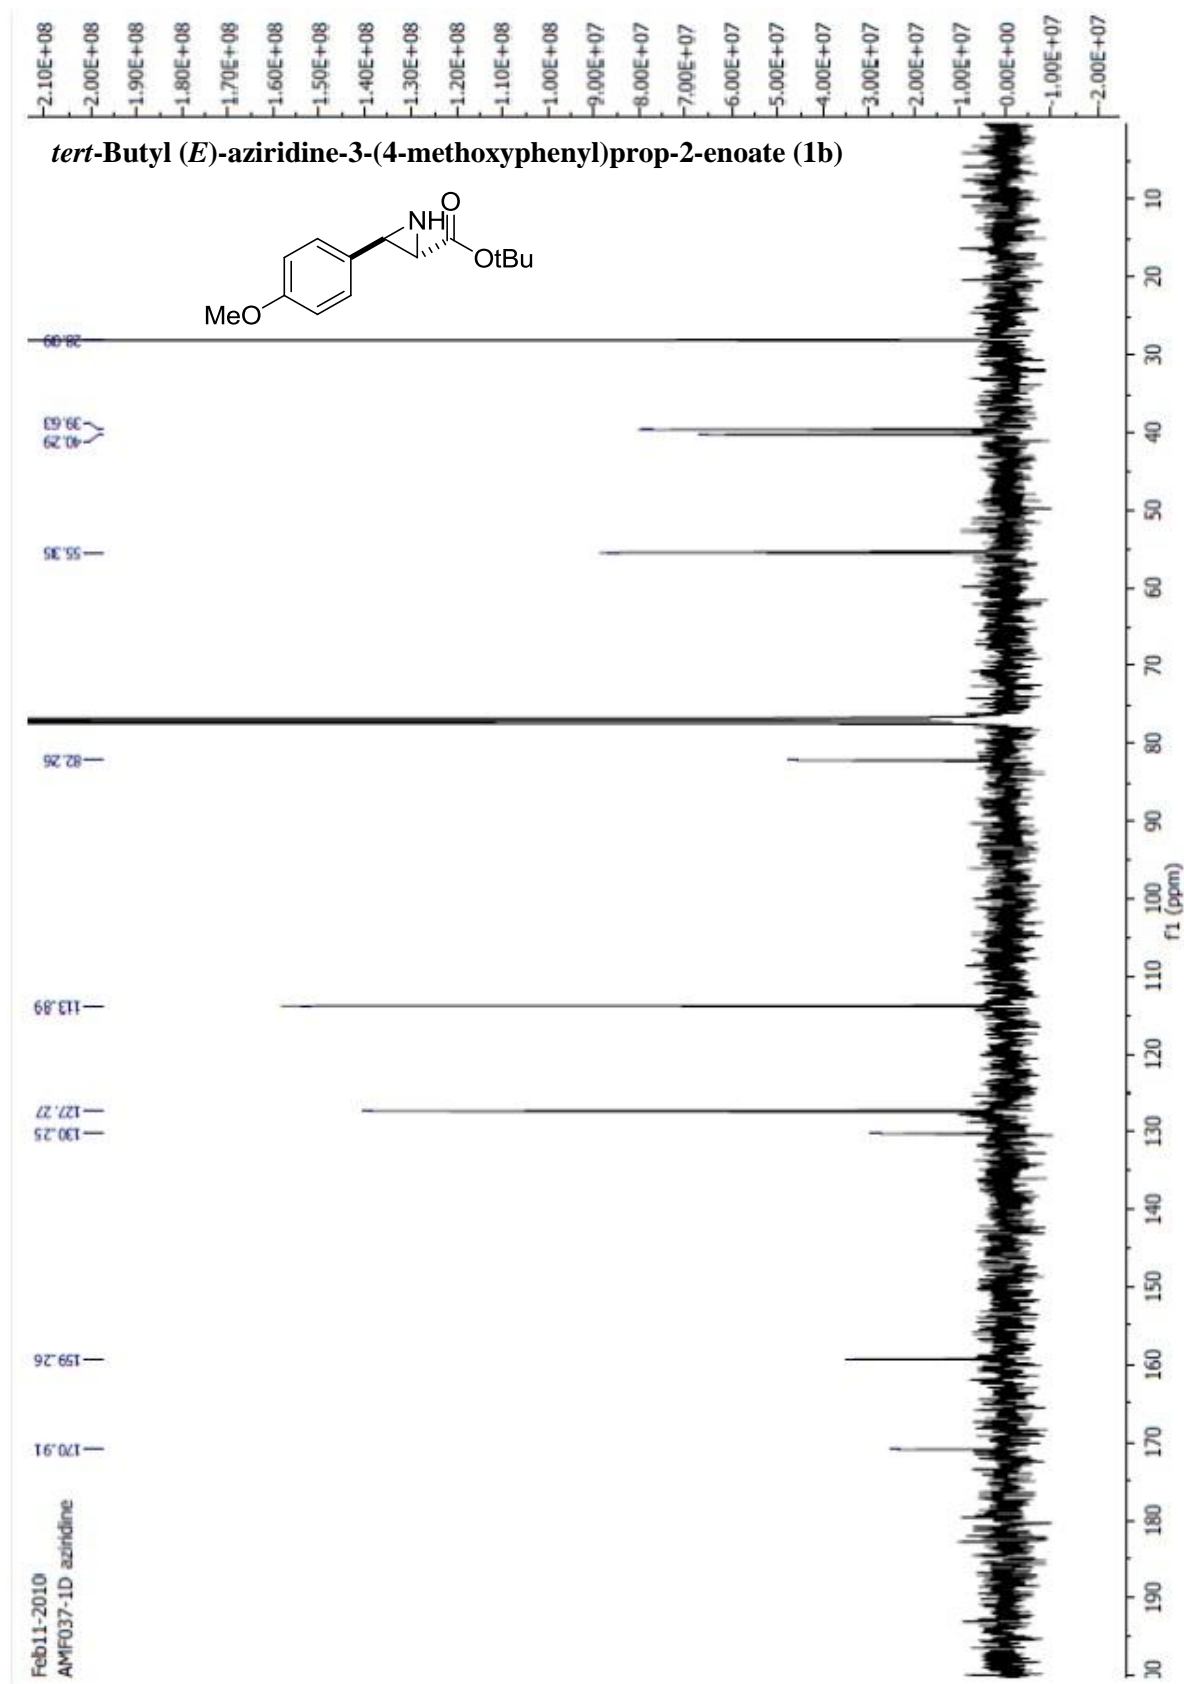

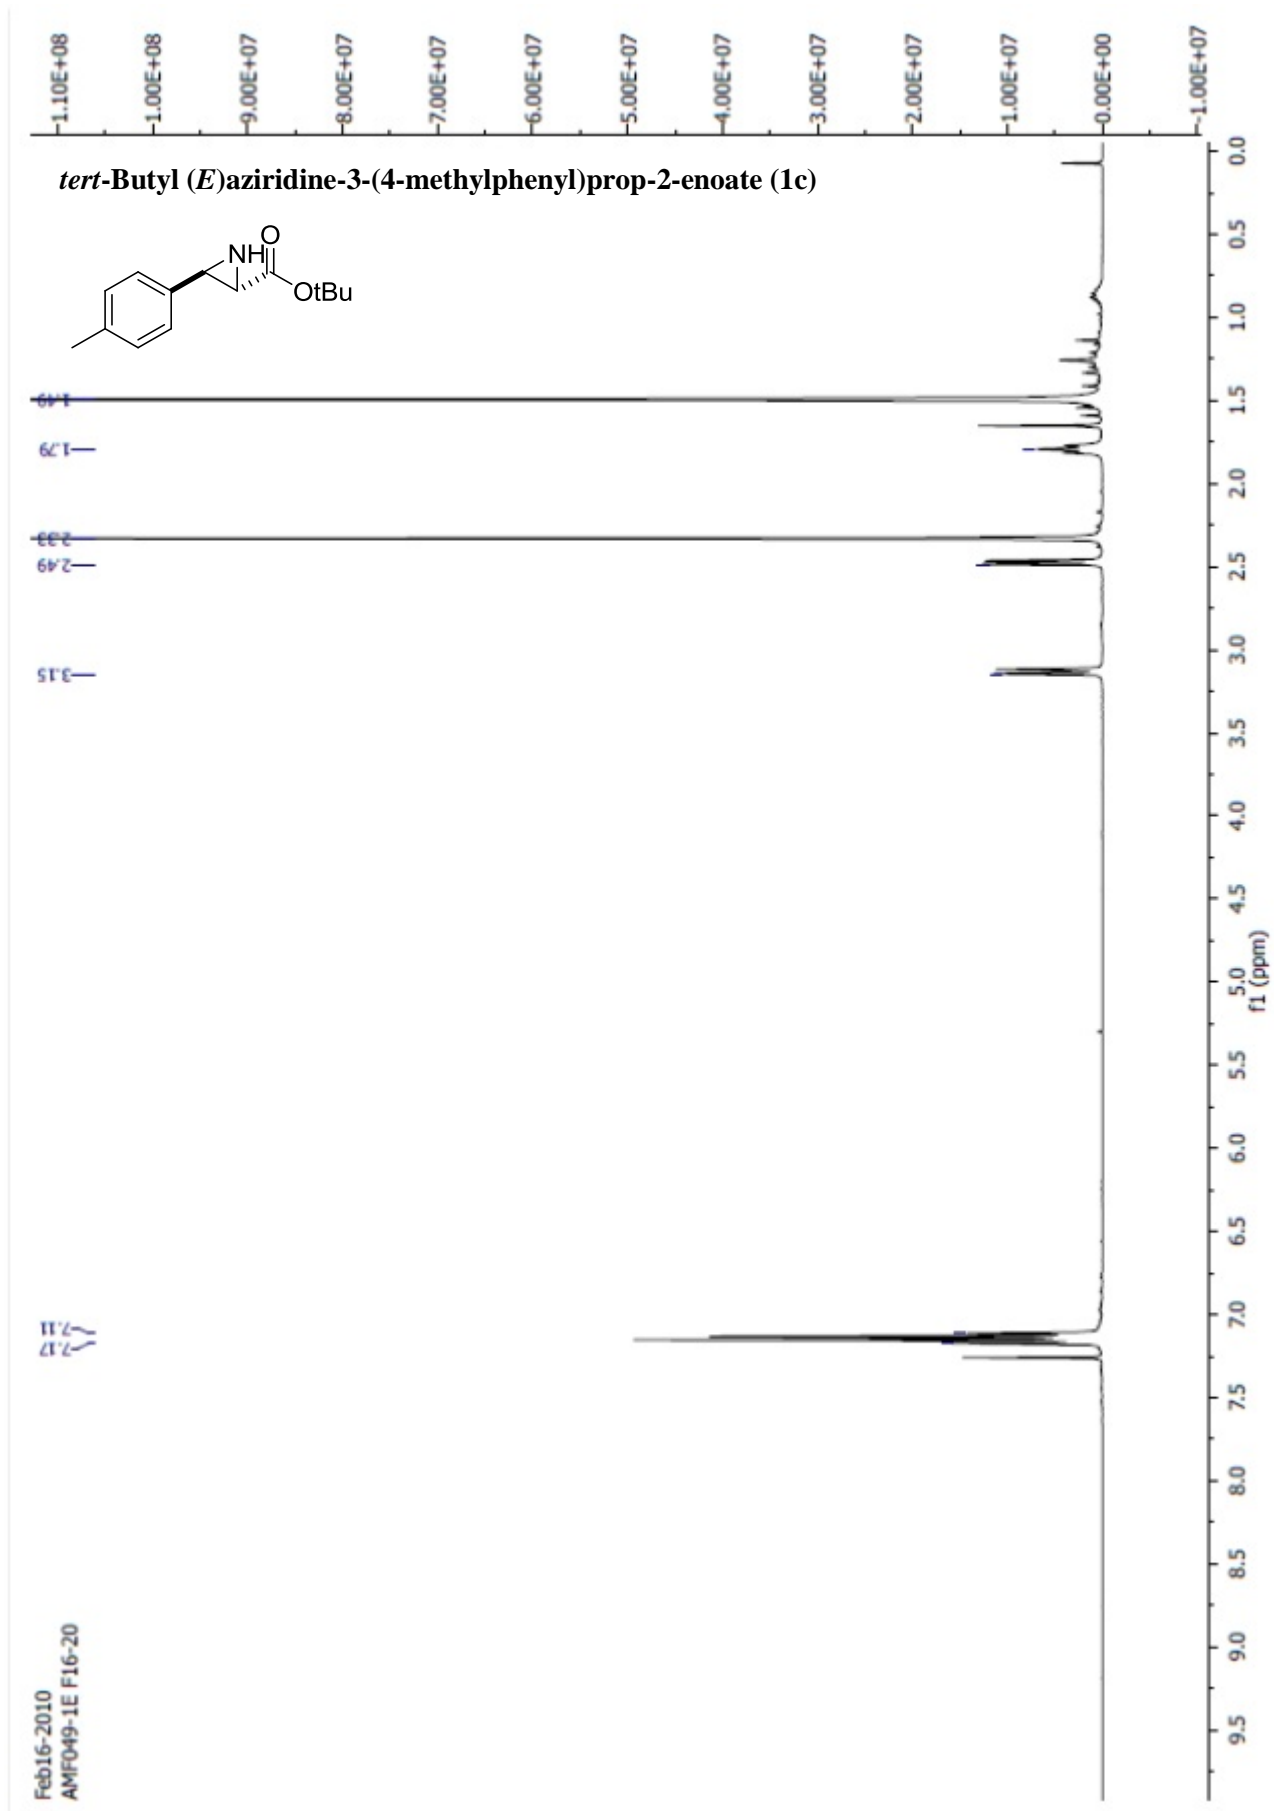

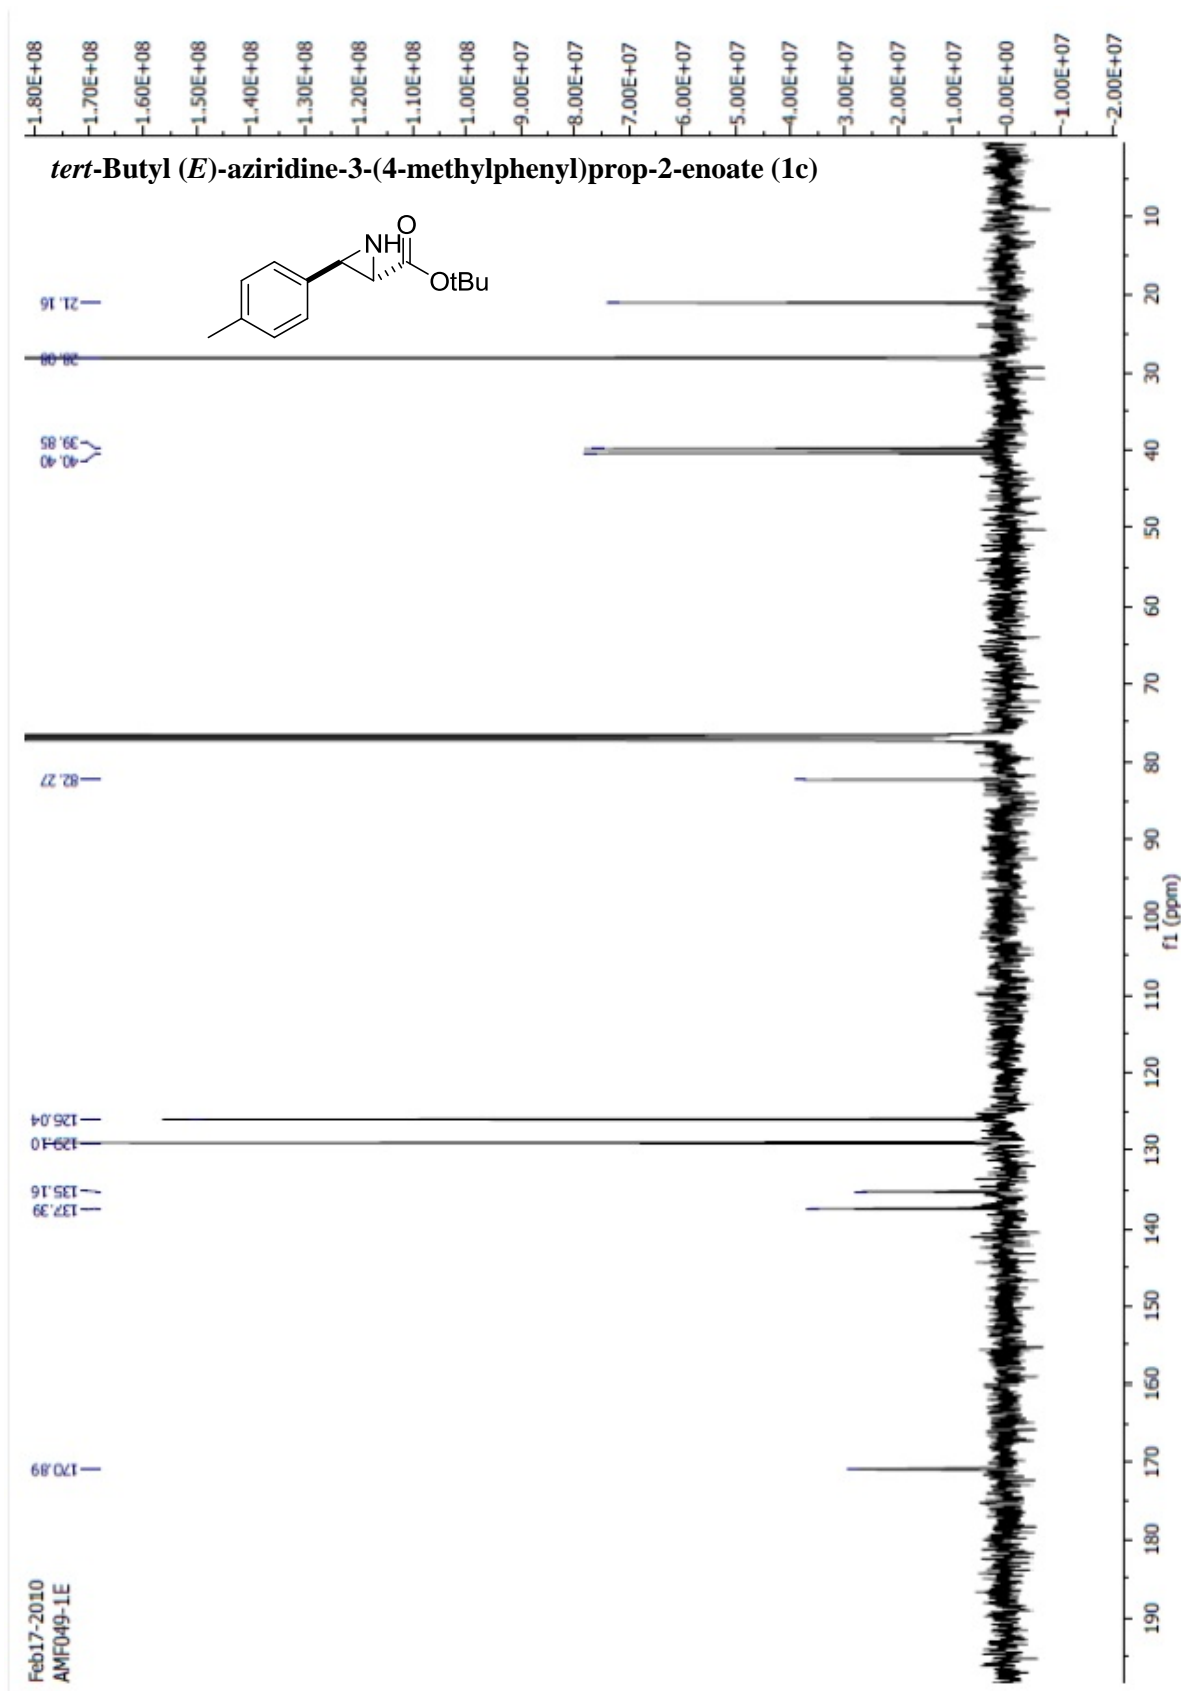

Feb12-2010  
AMF047-1G F8-15

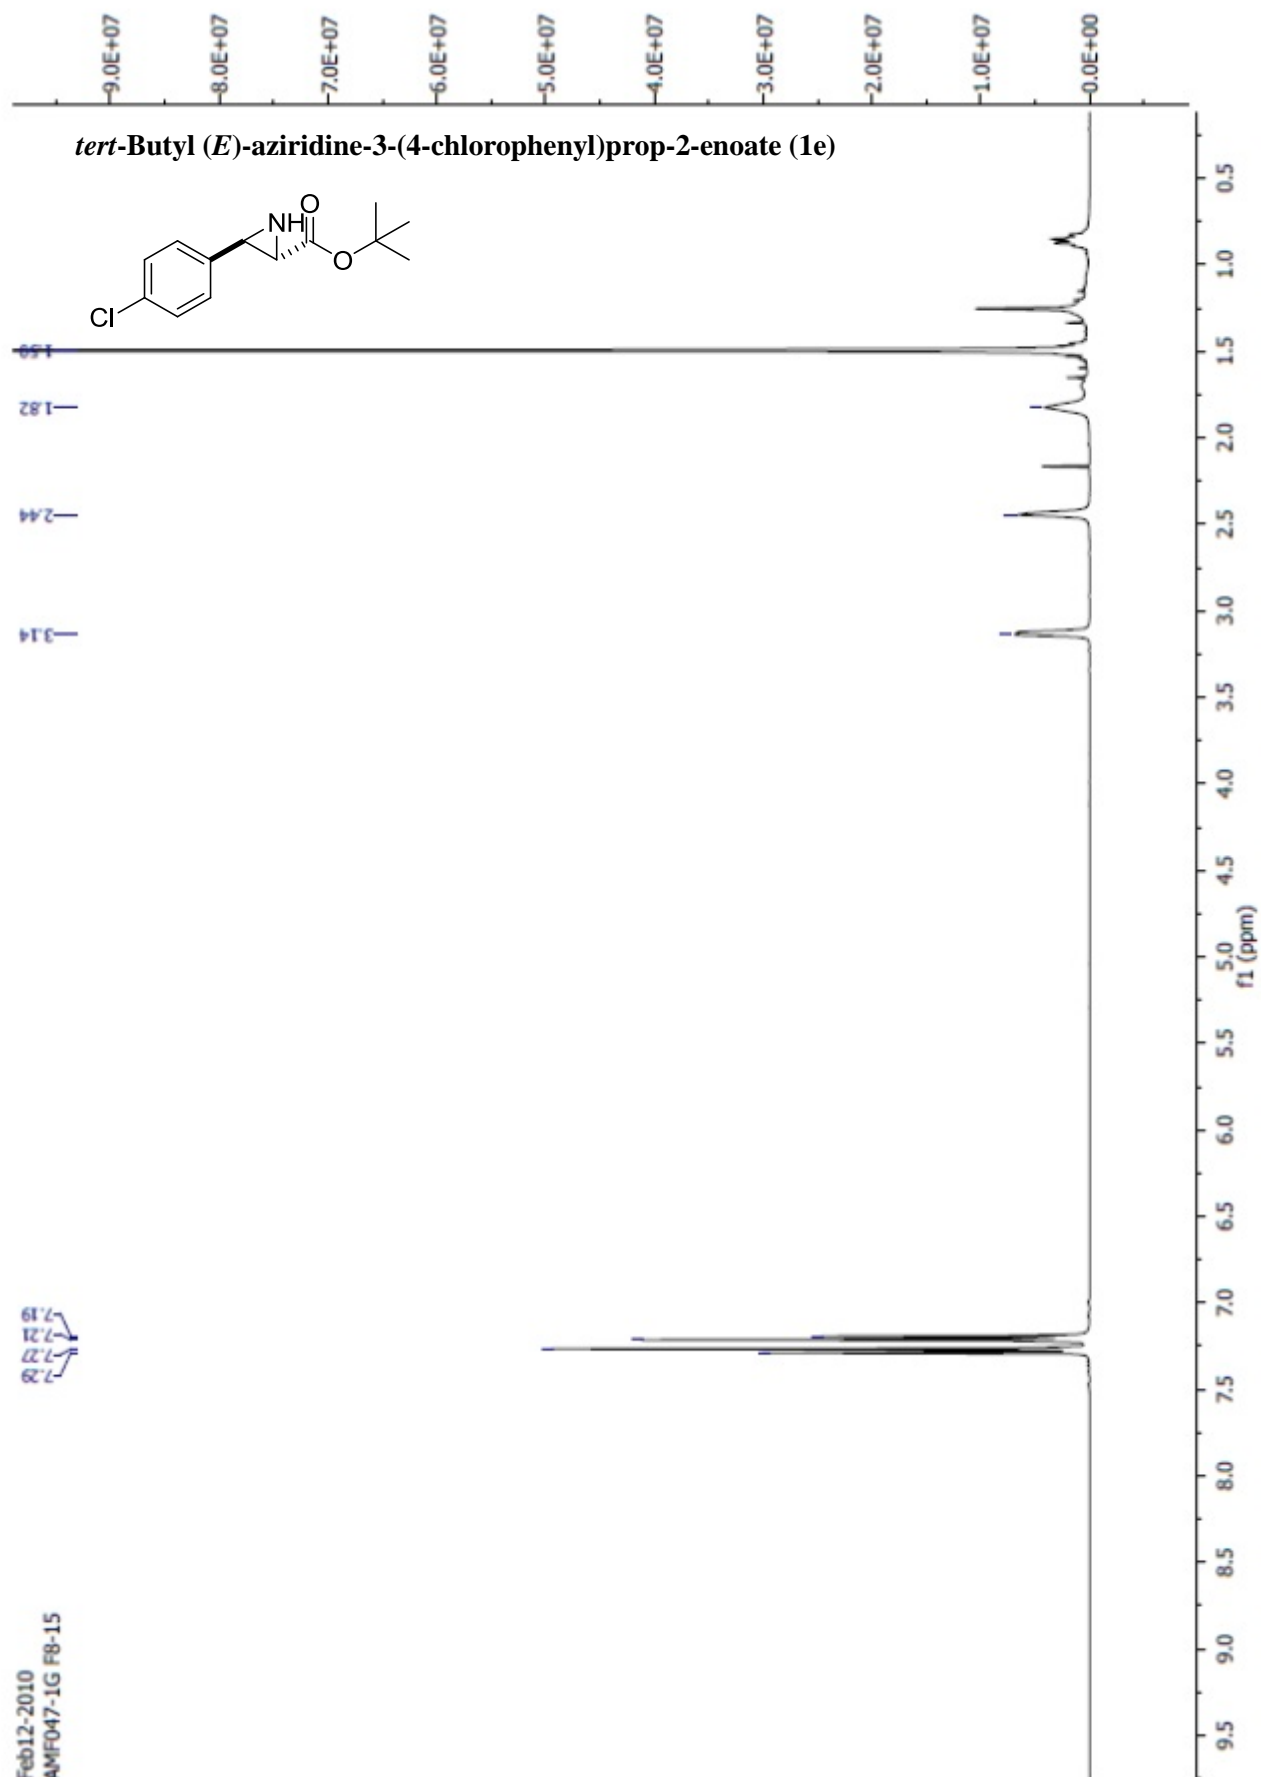

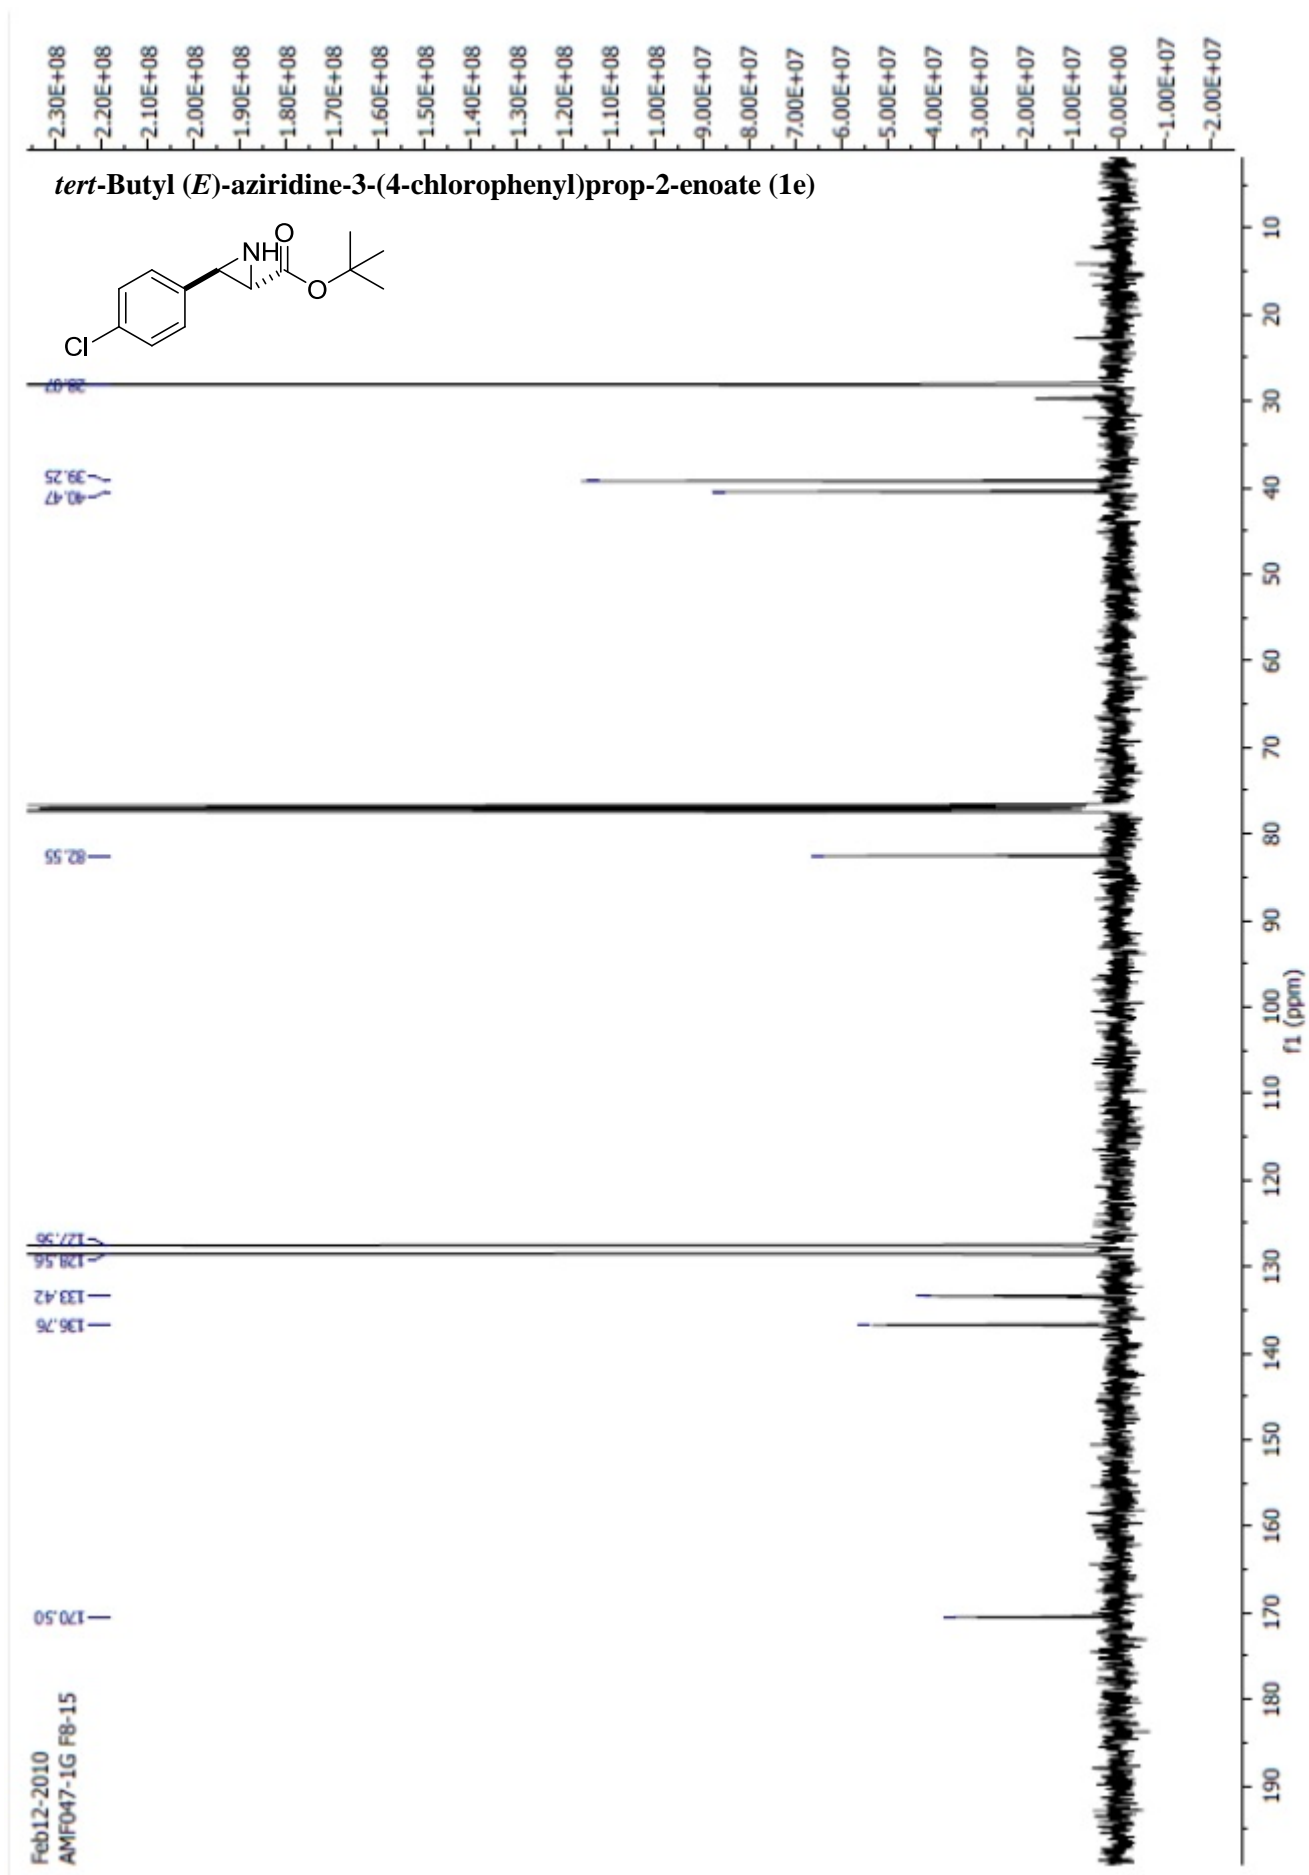

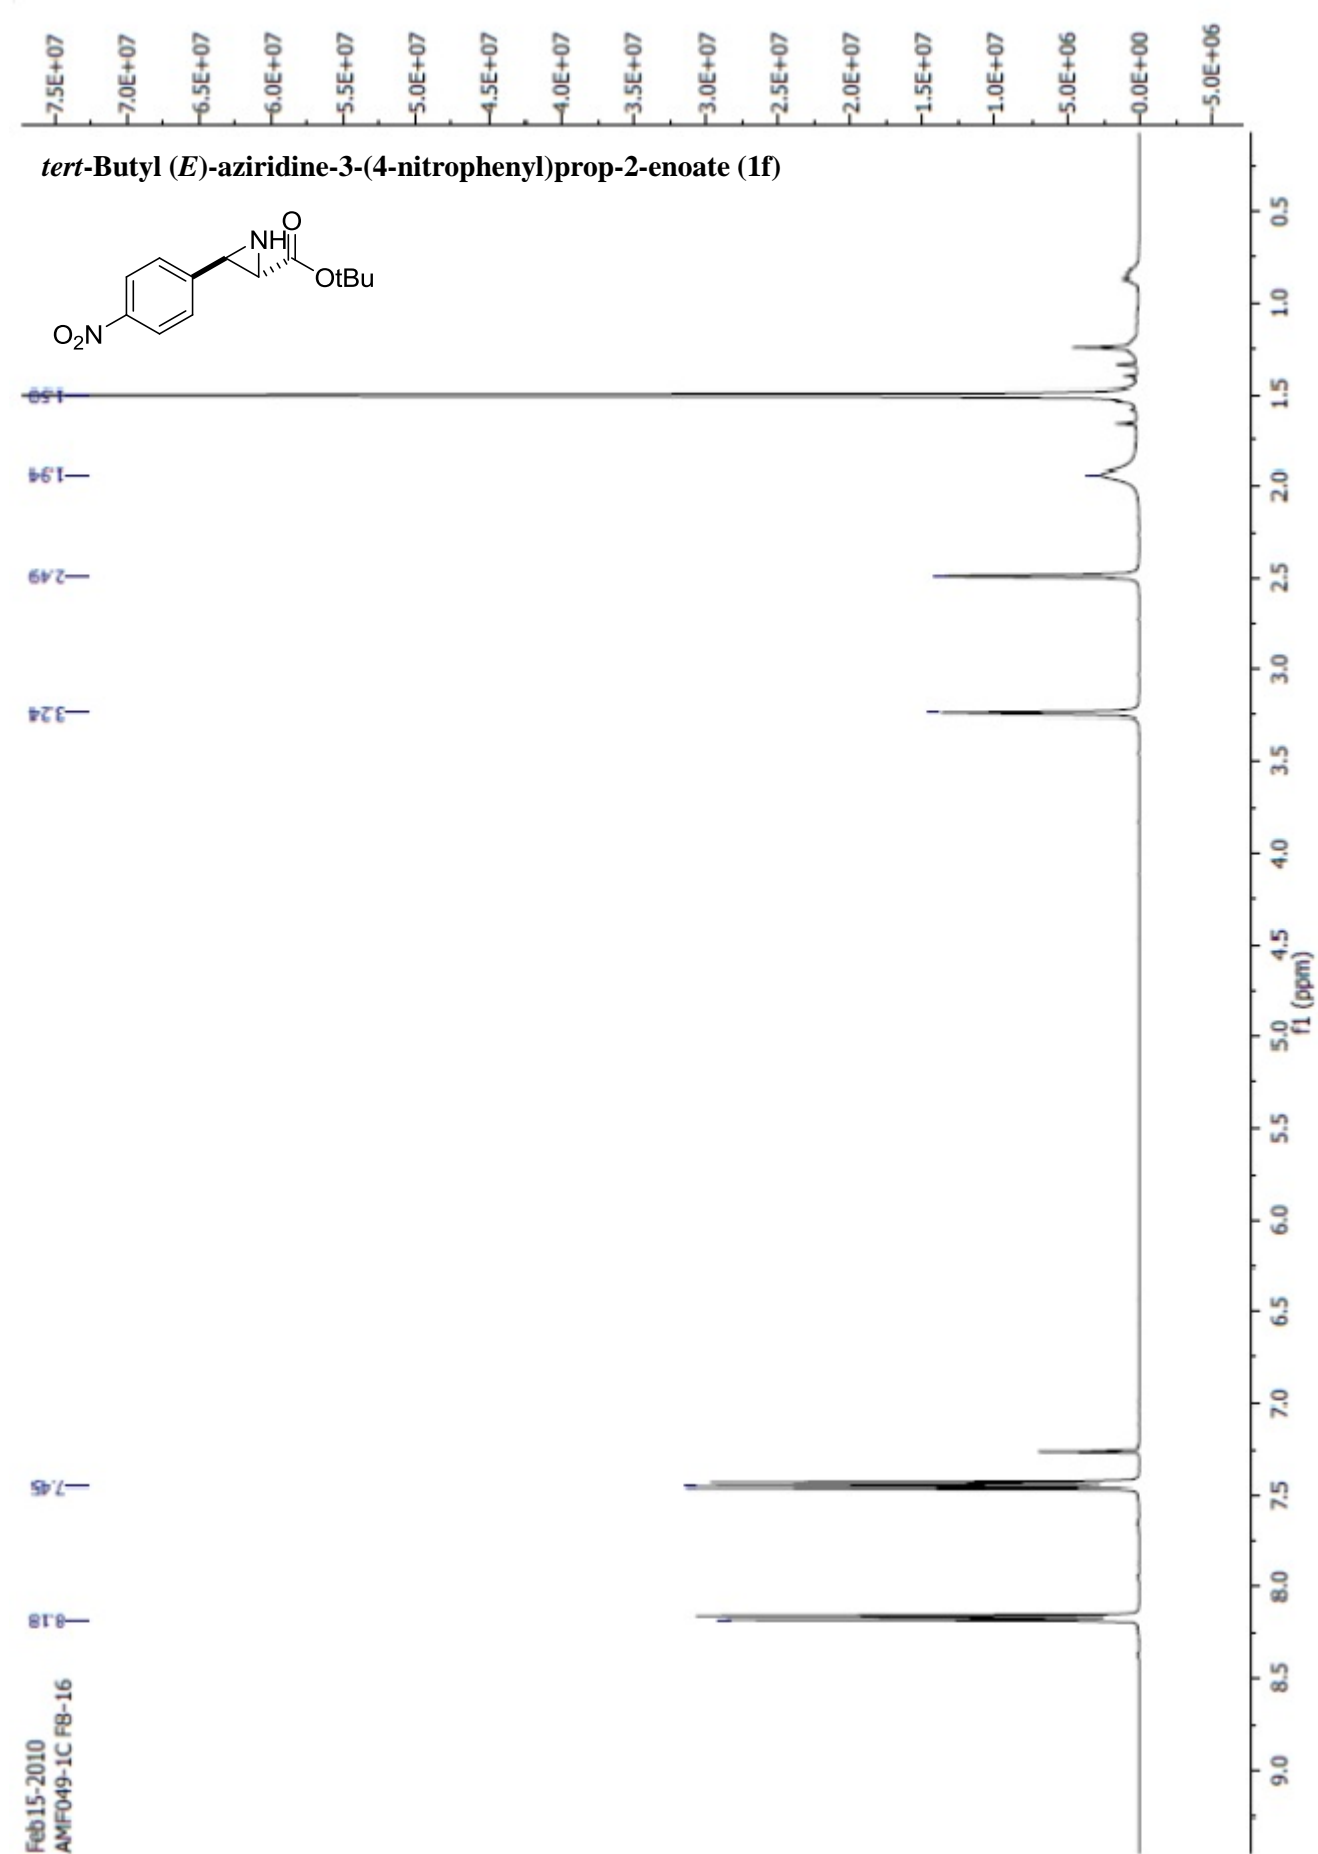



Av-400C

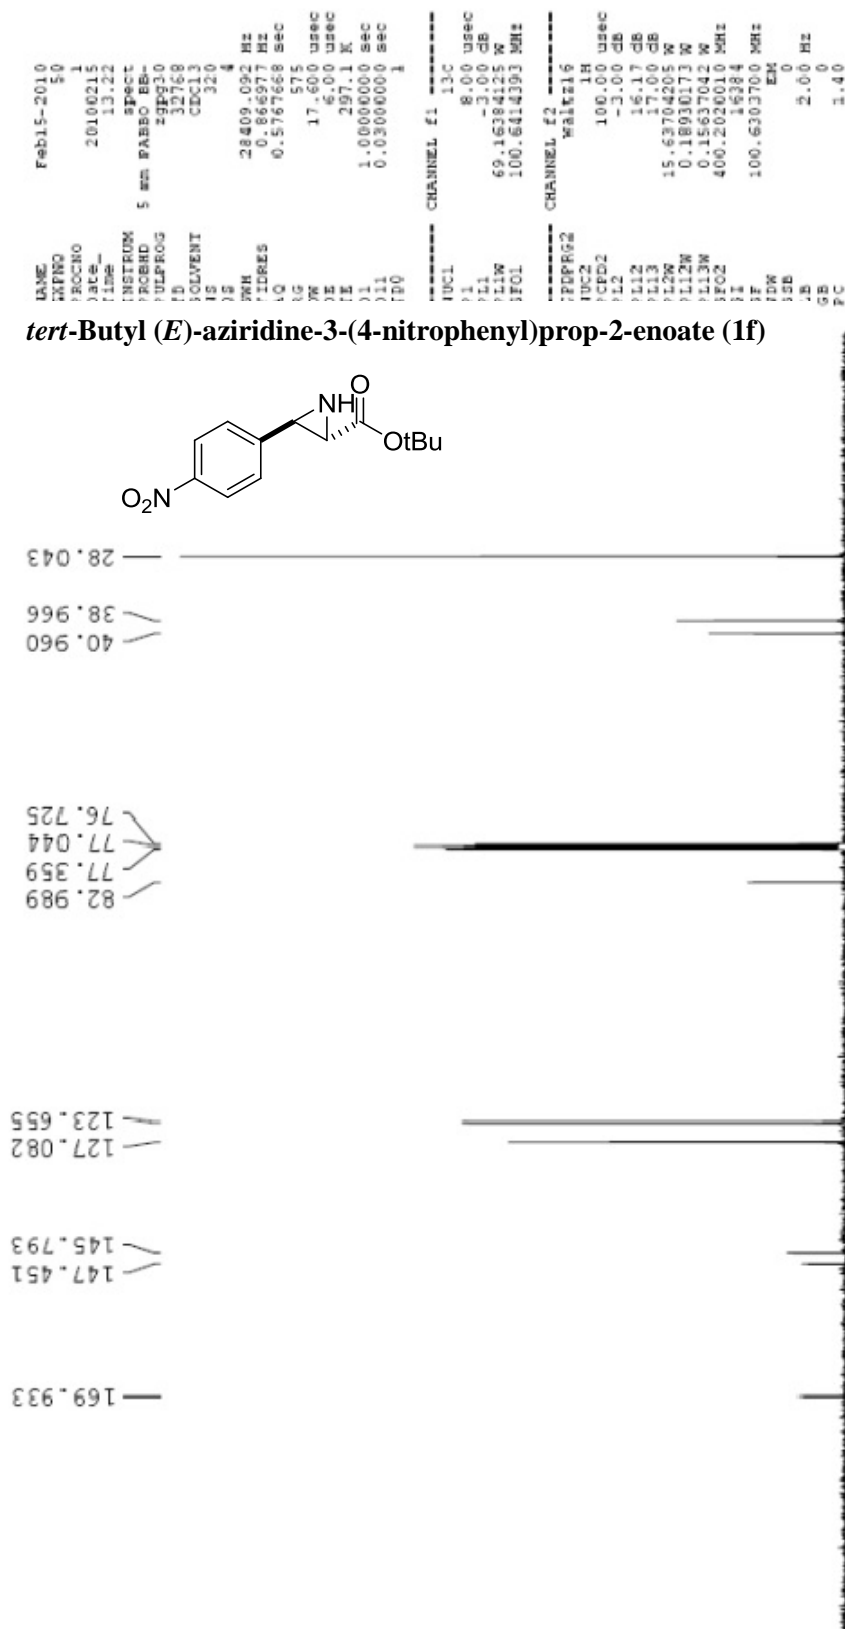

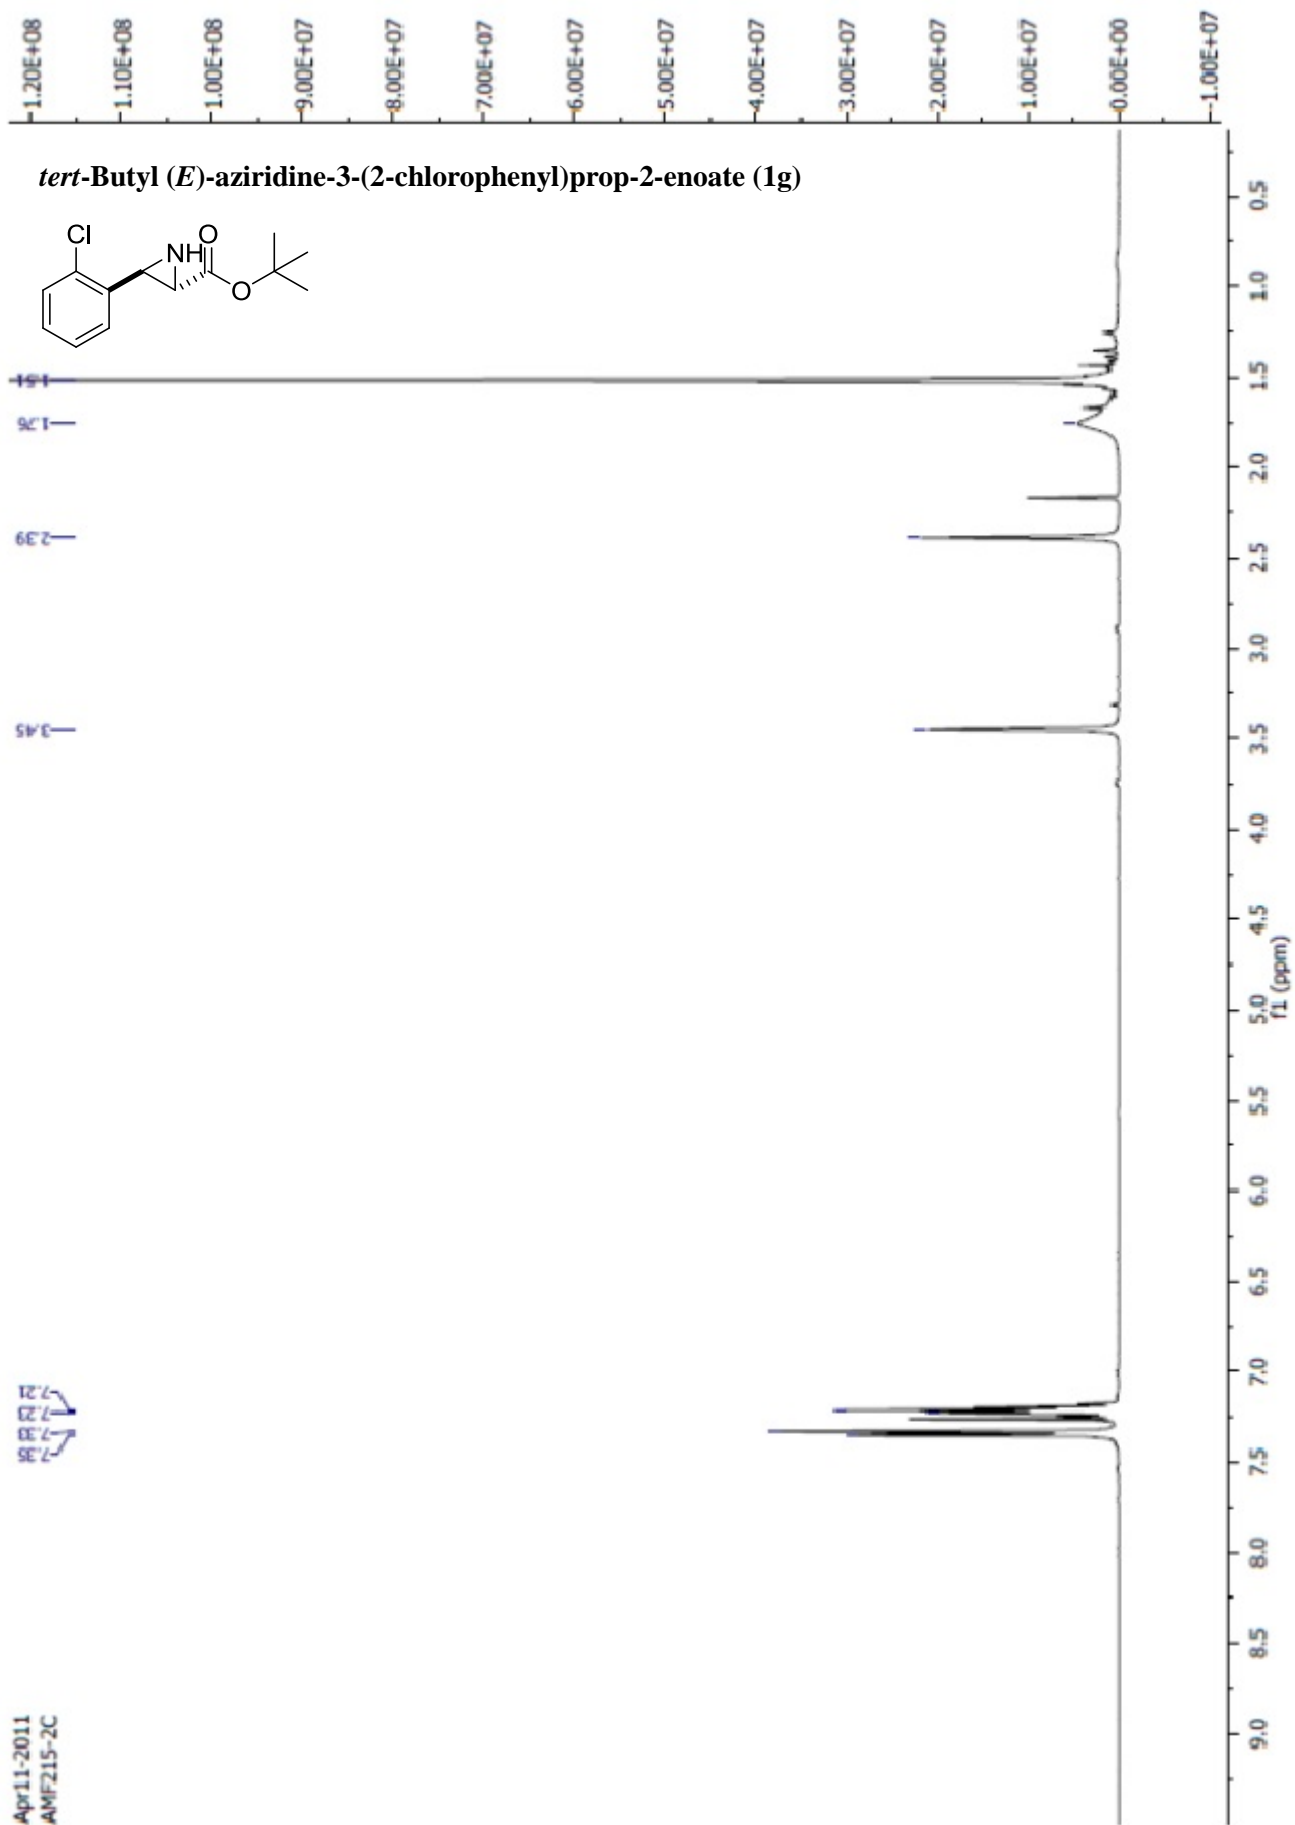

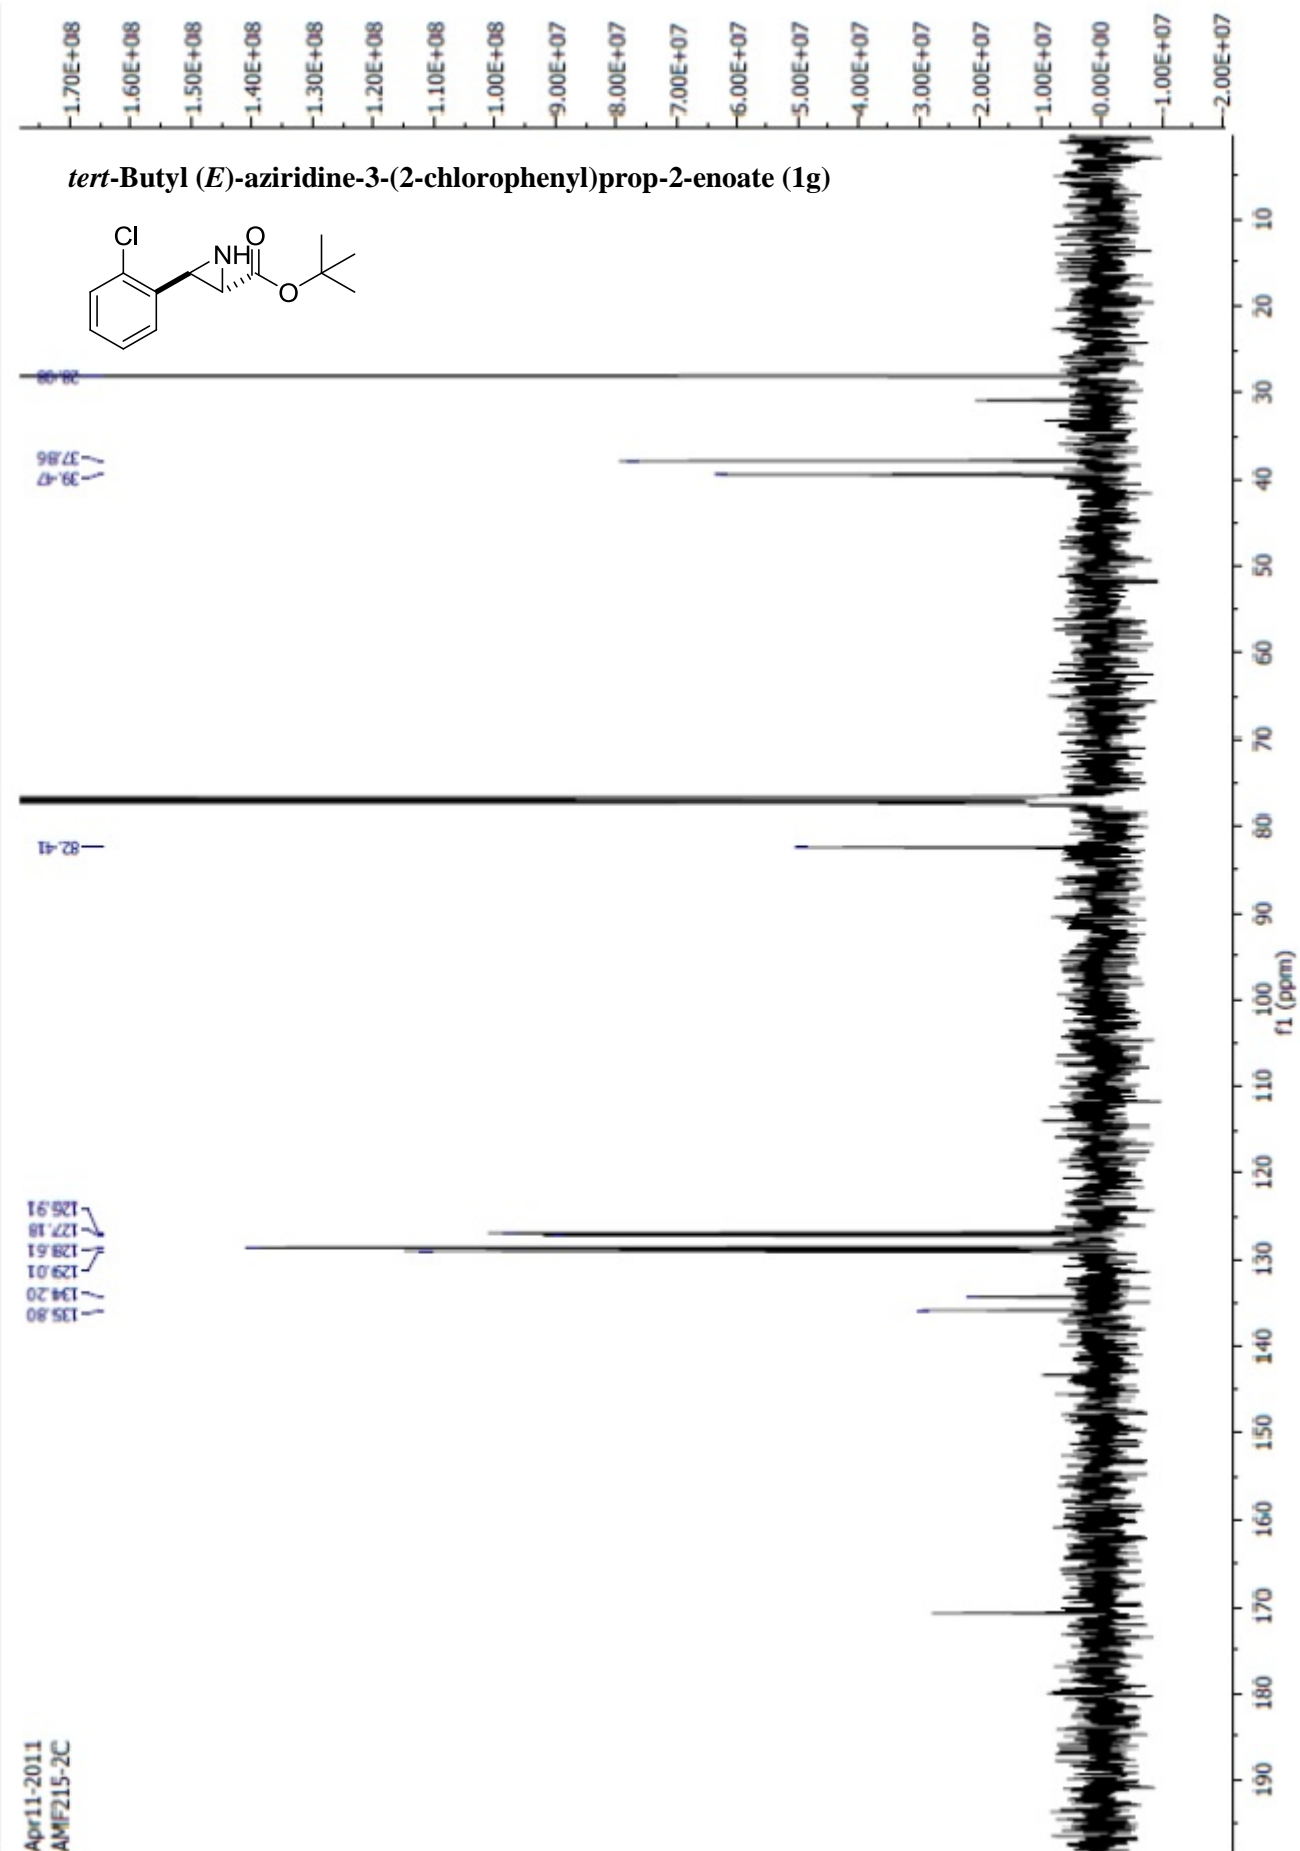

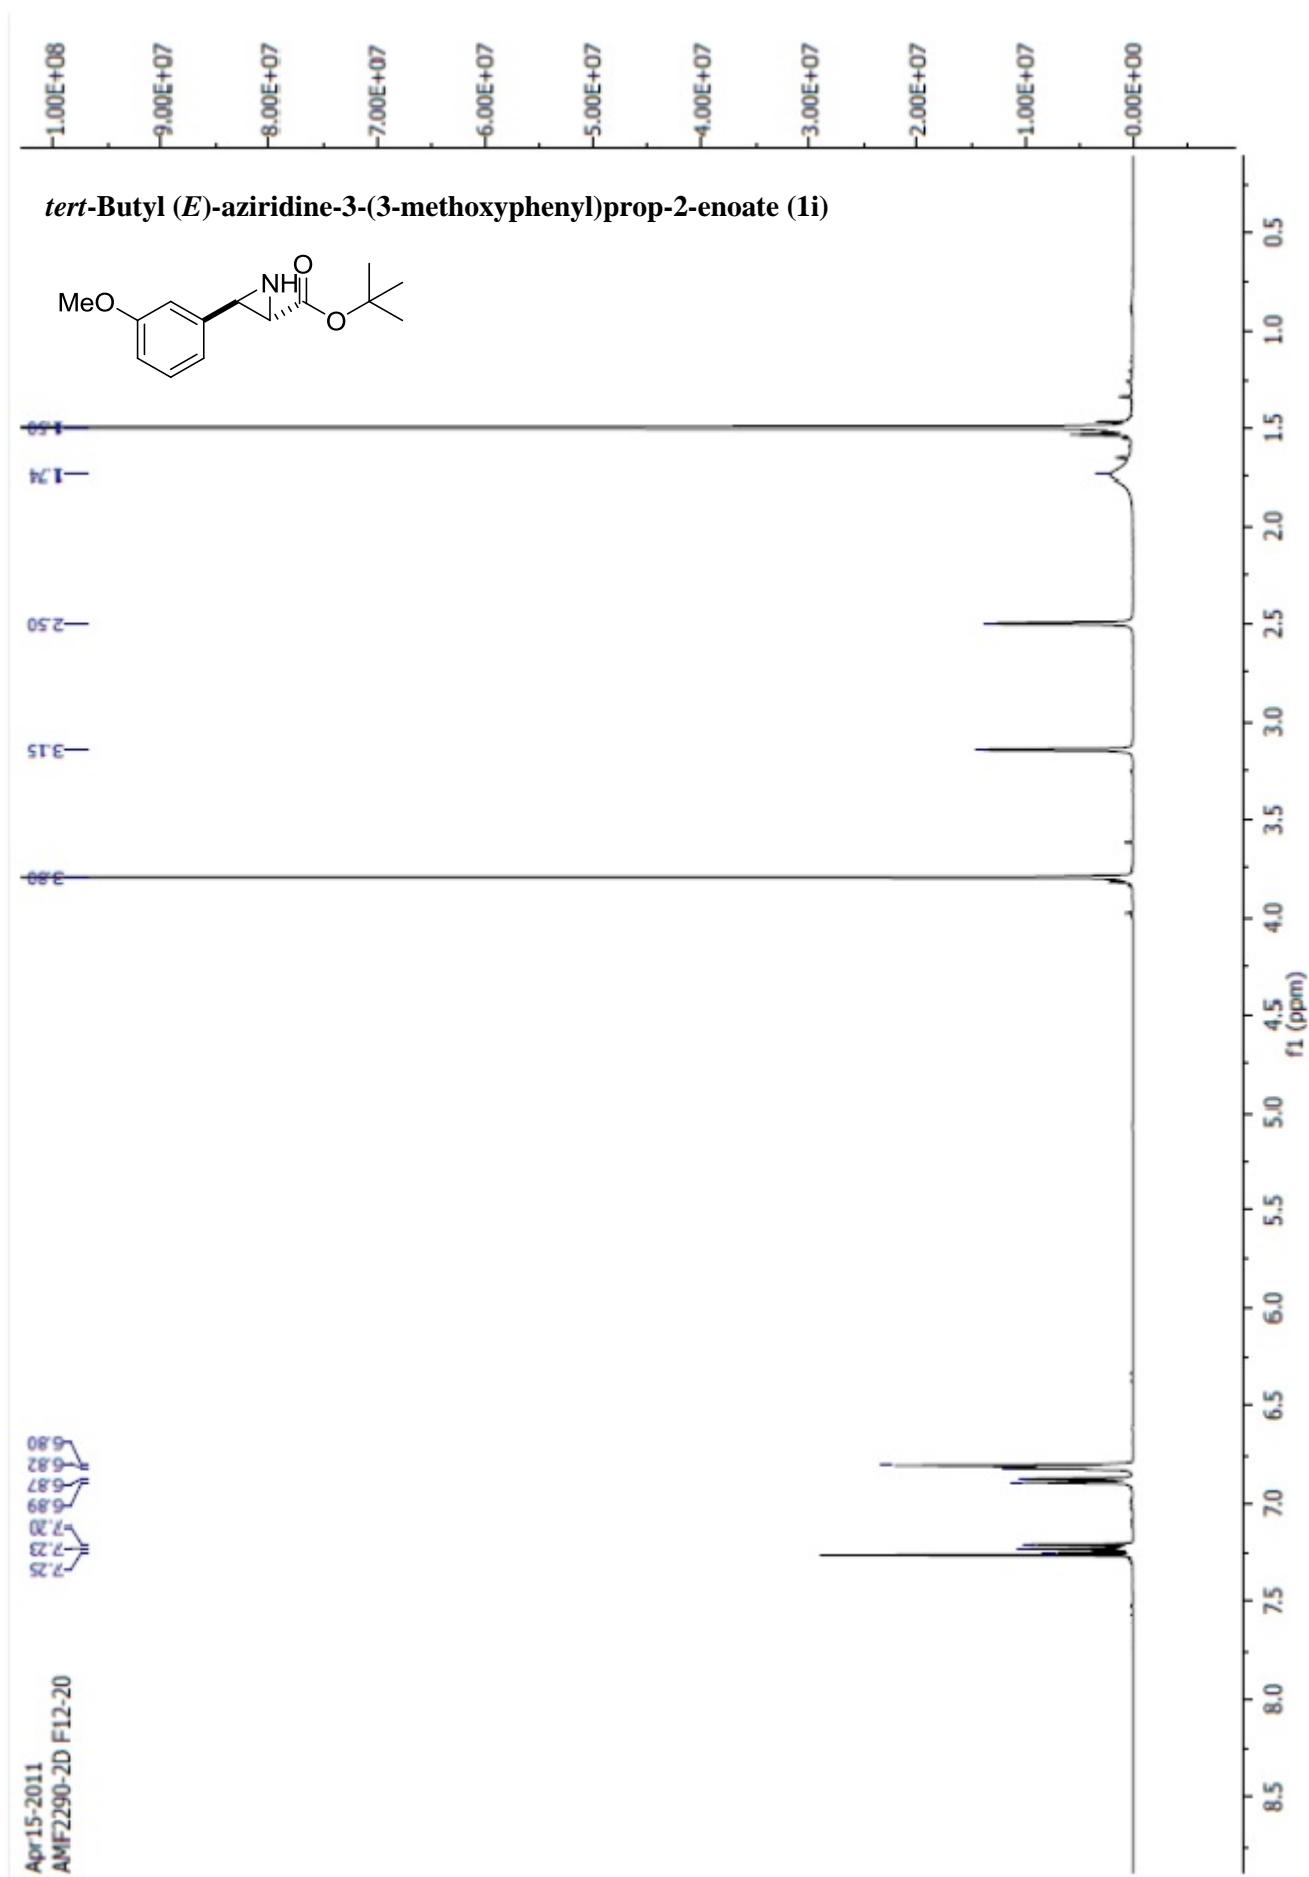

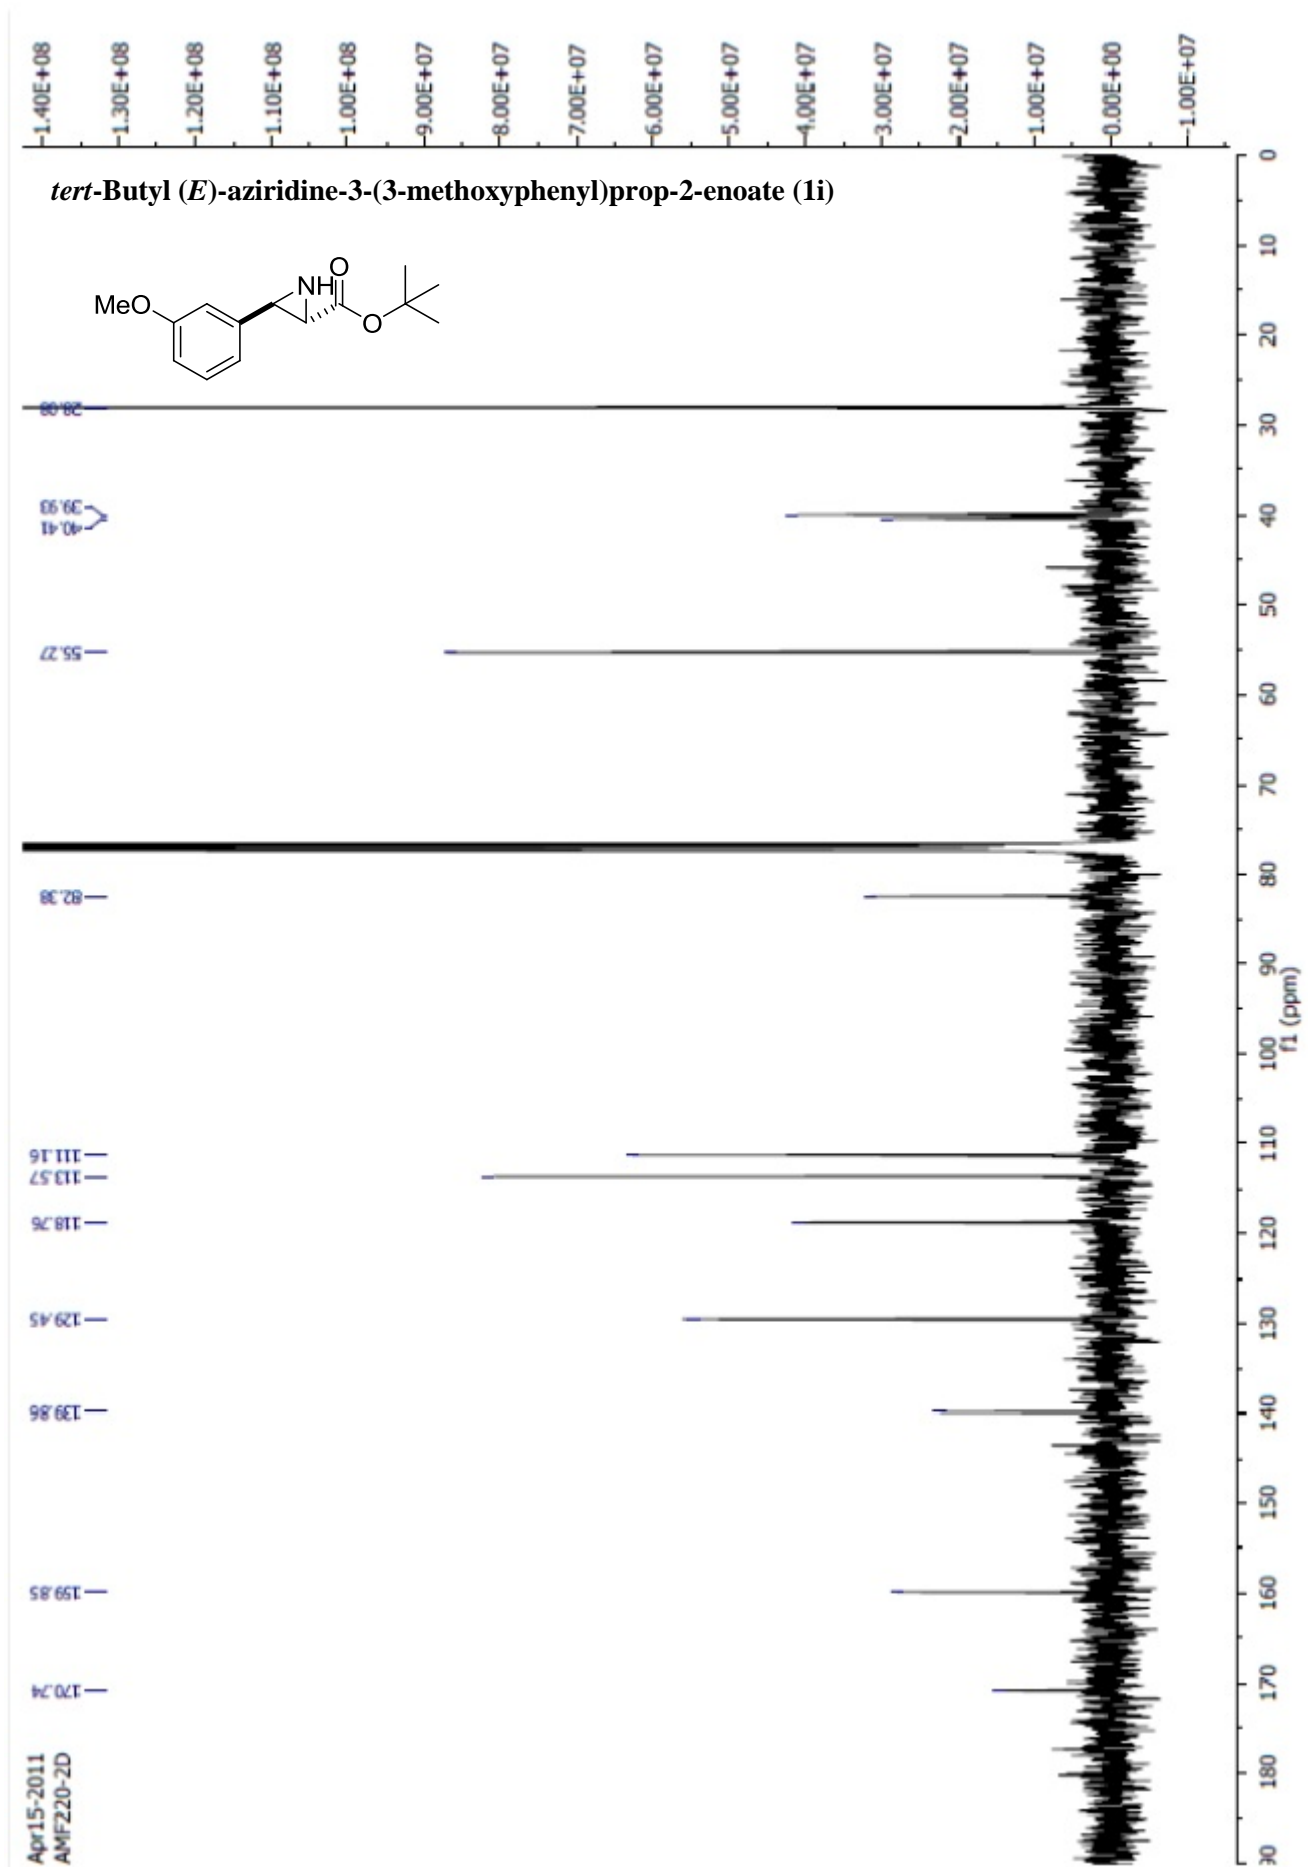

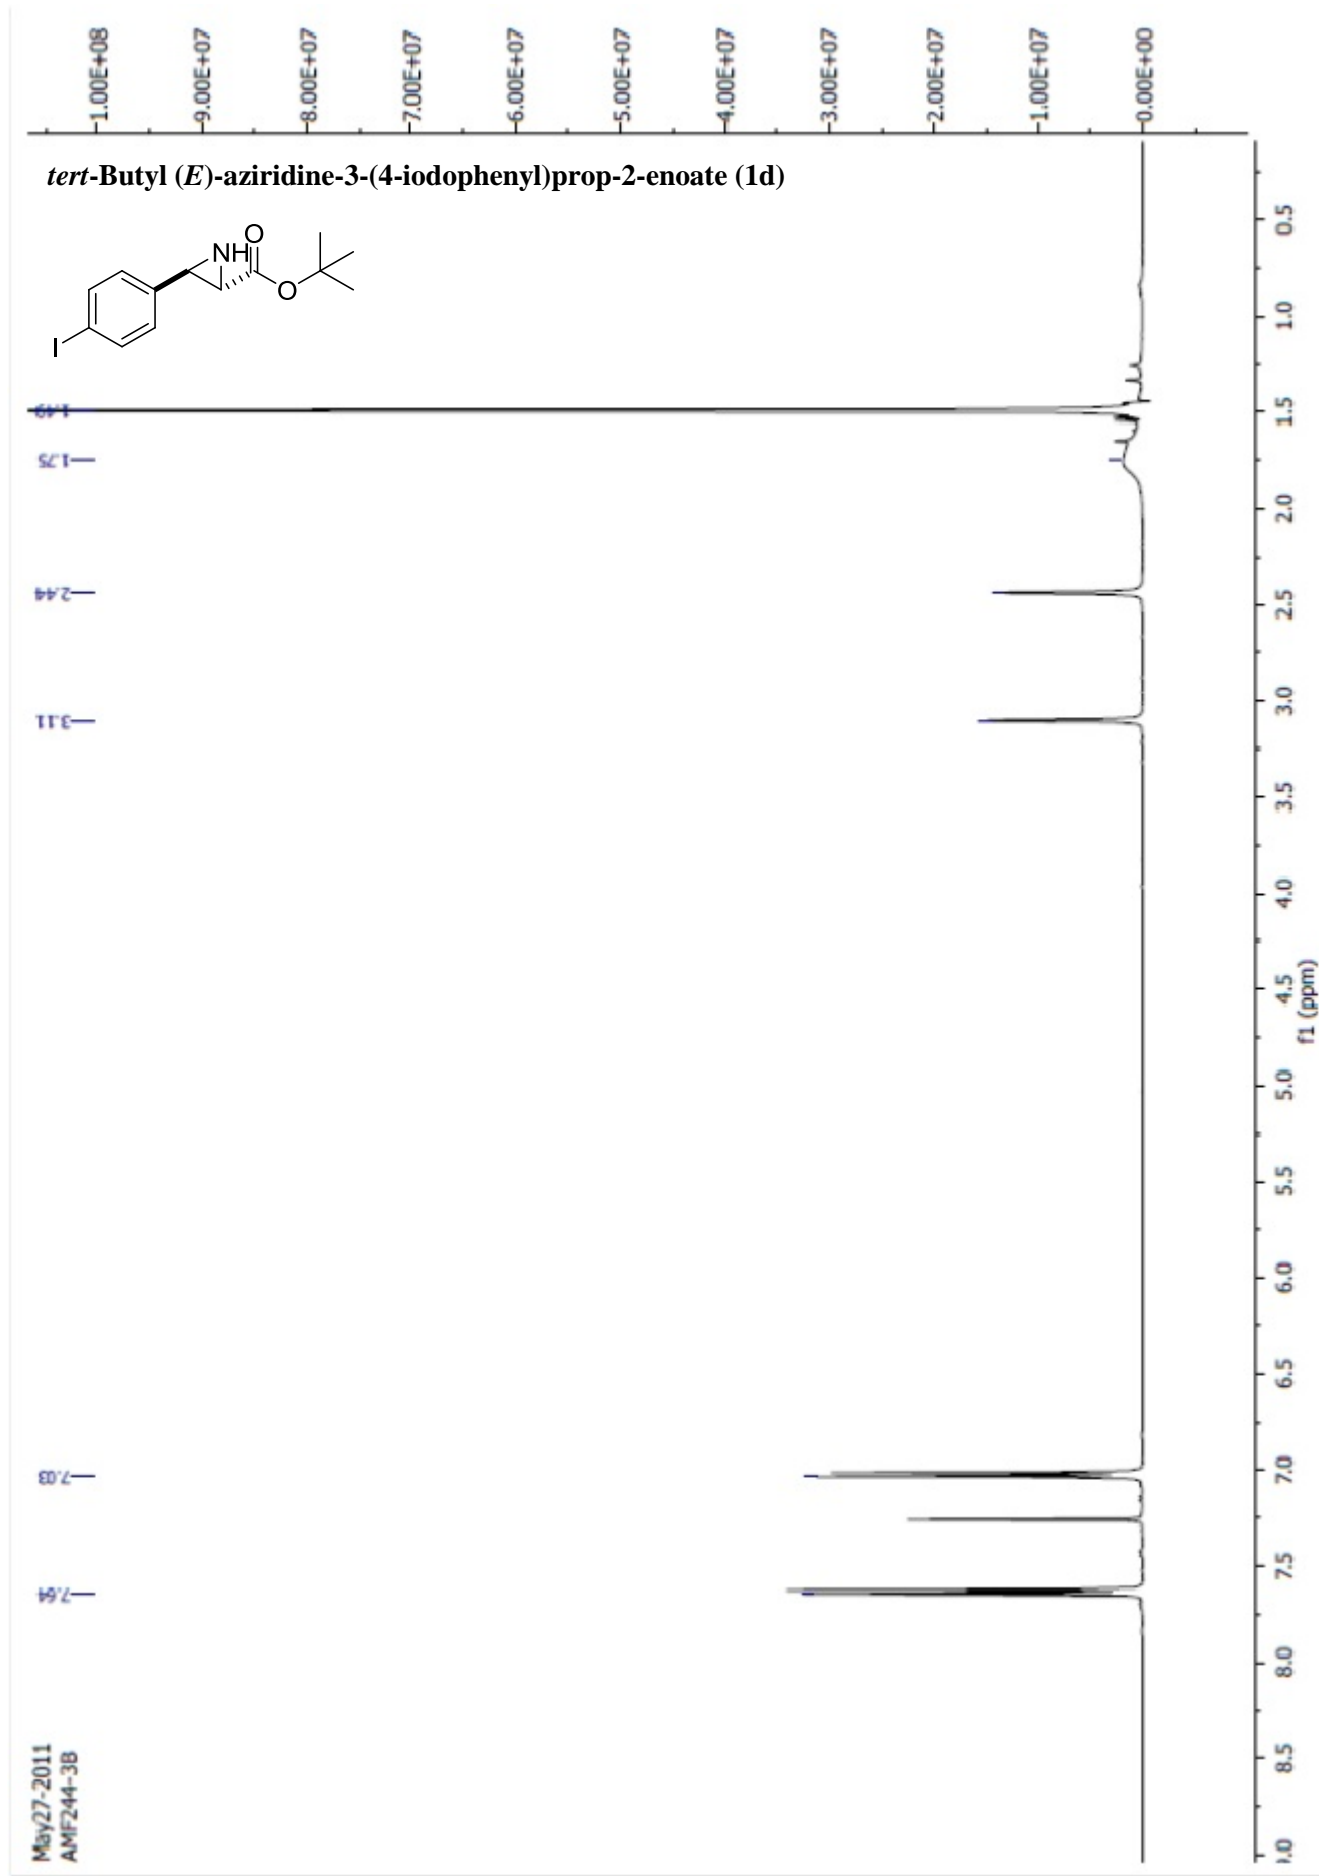



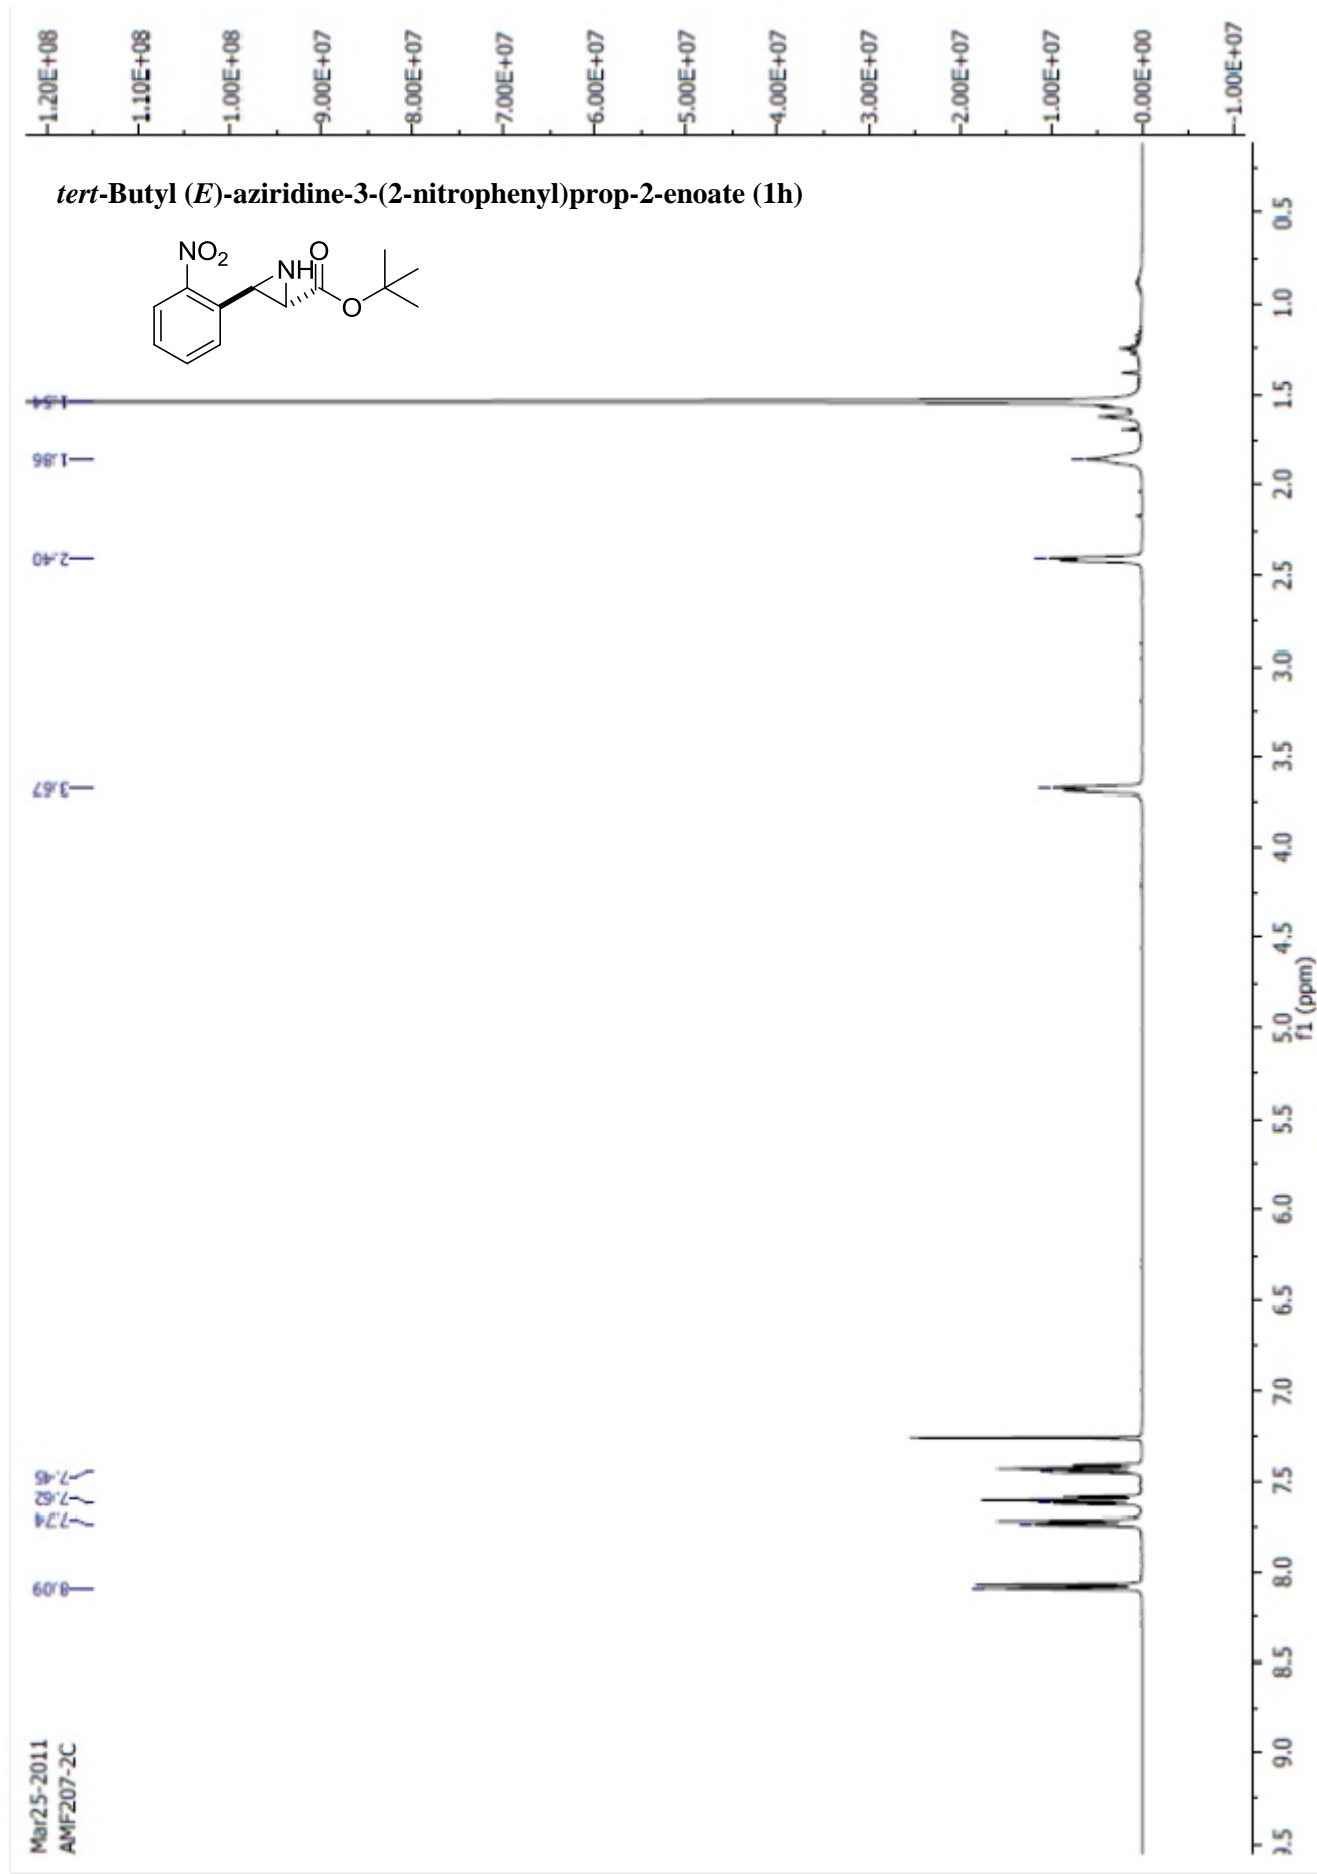



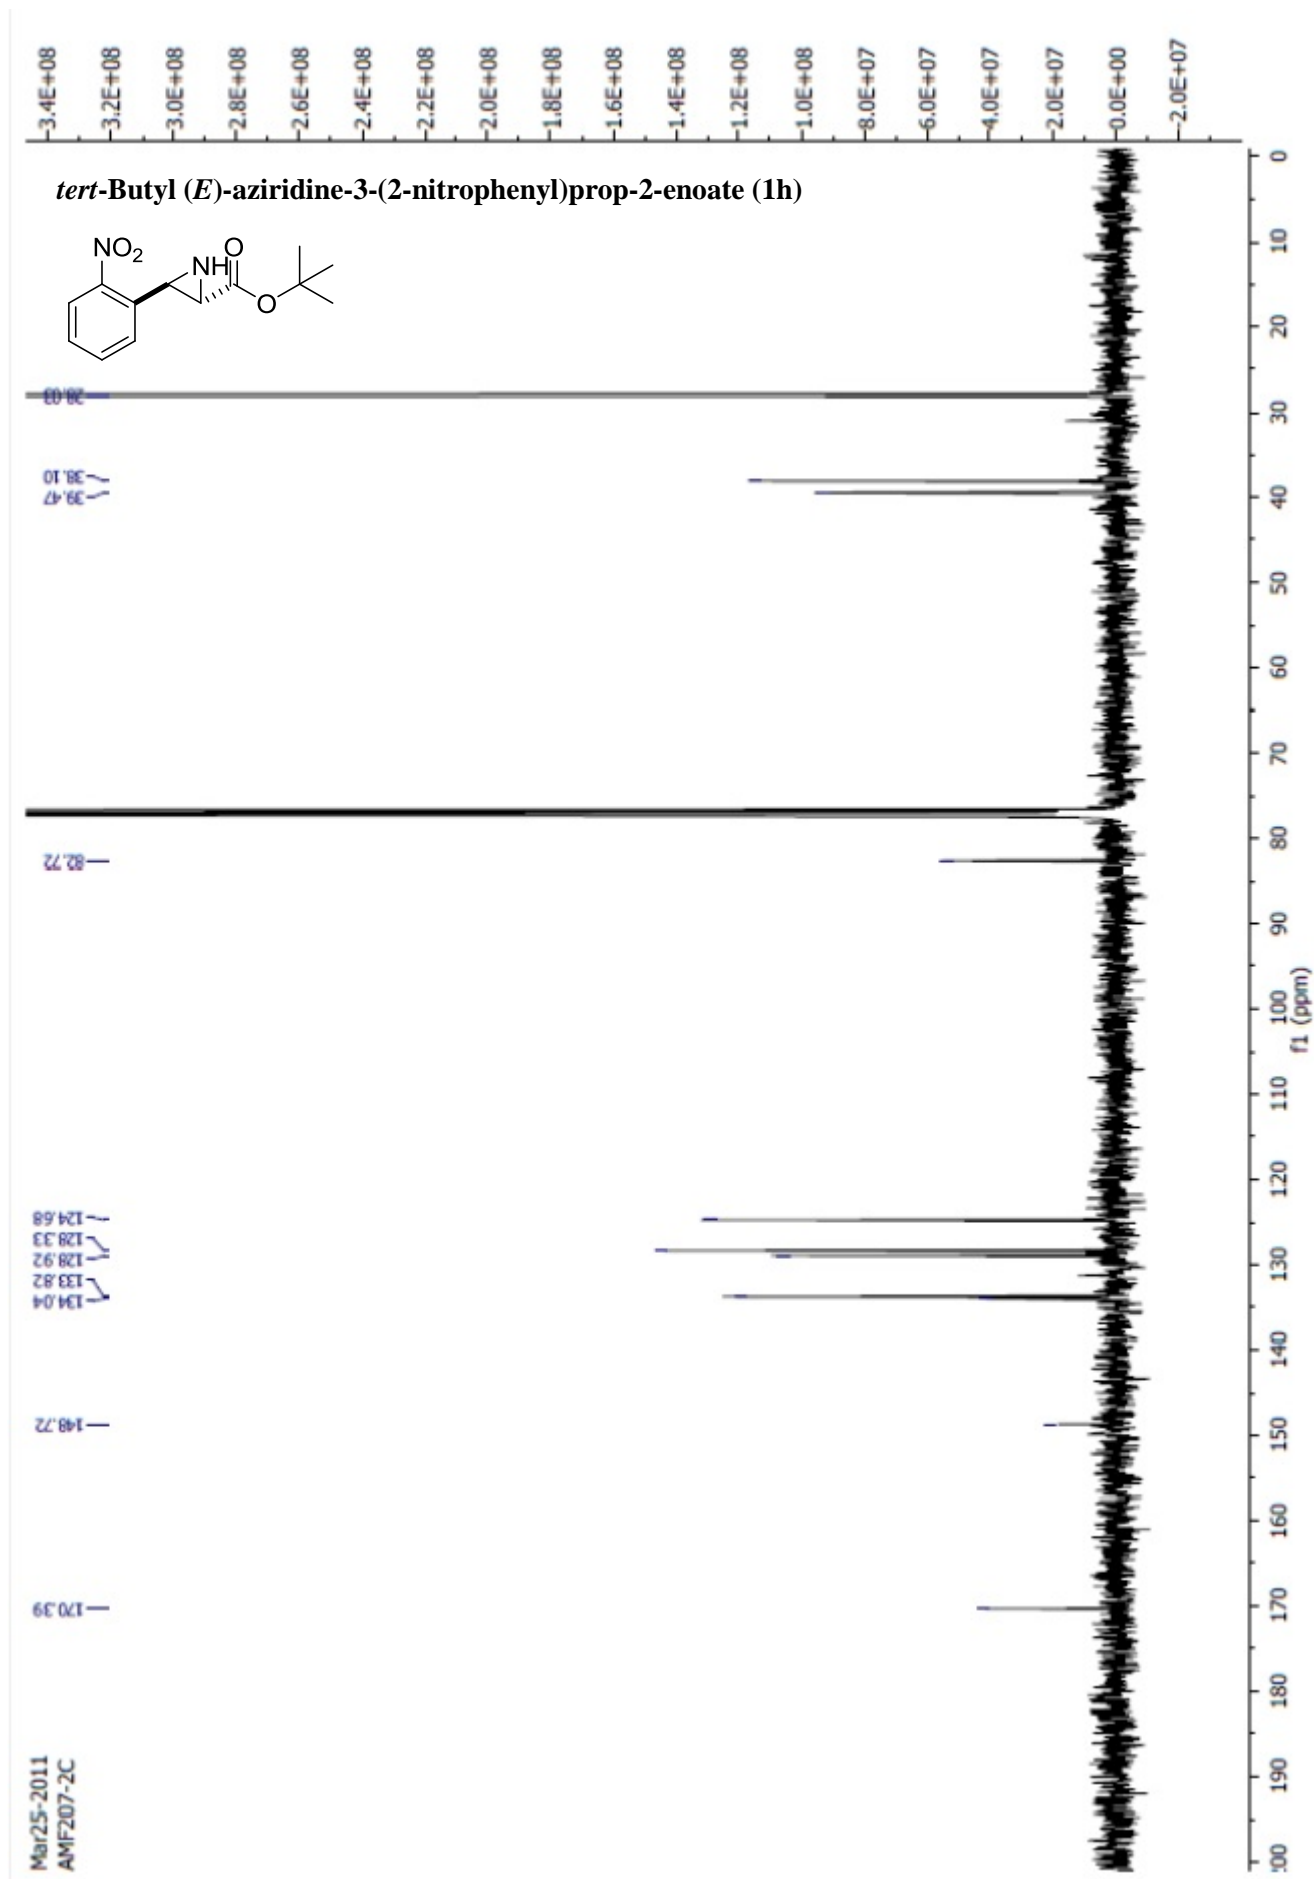

Feb16-2011  
AMF193-2C

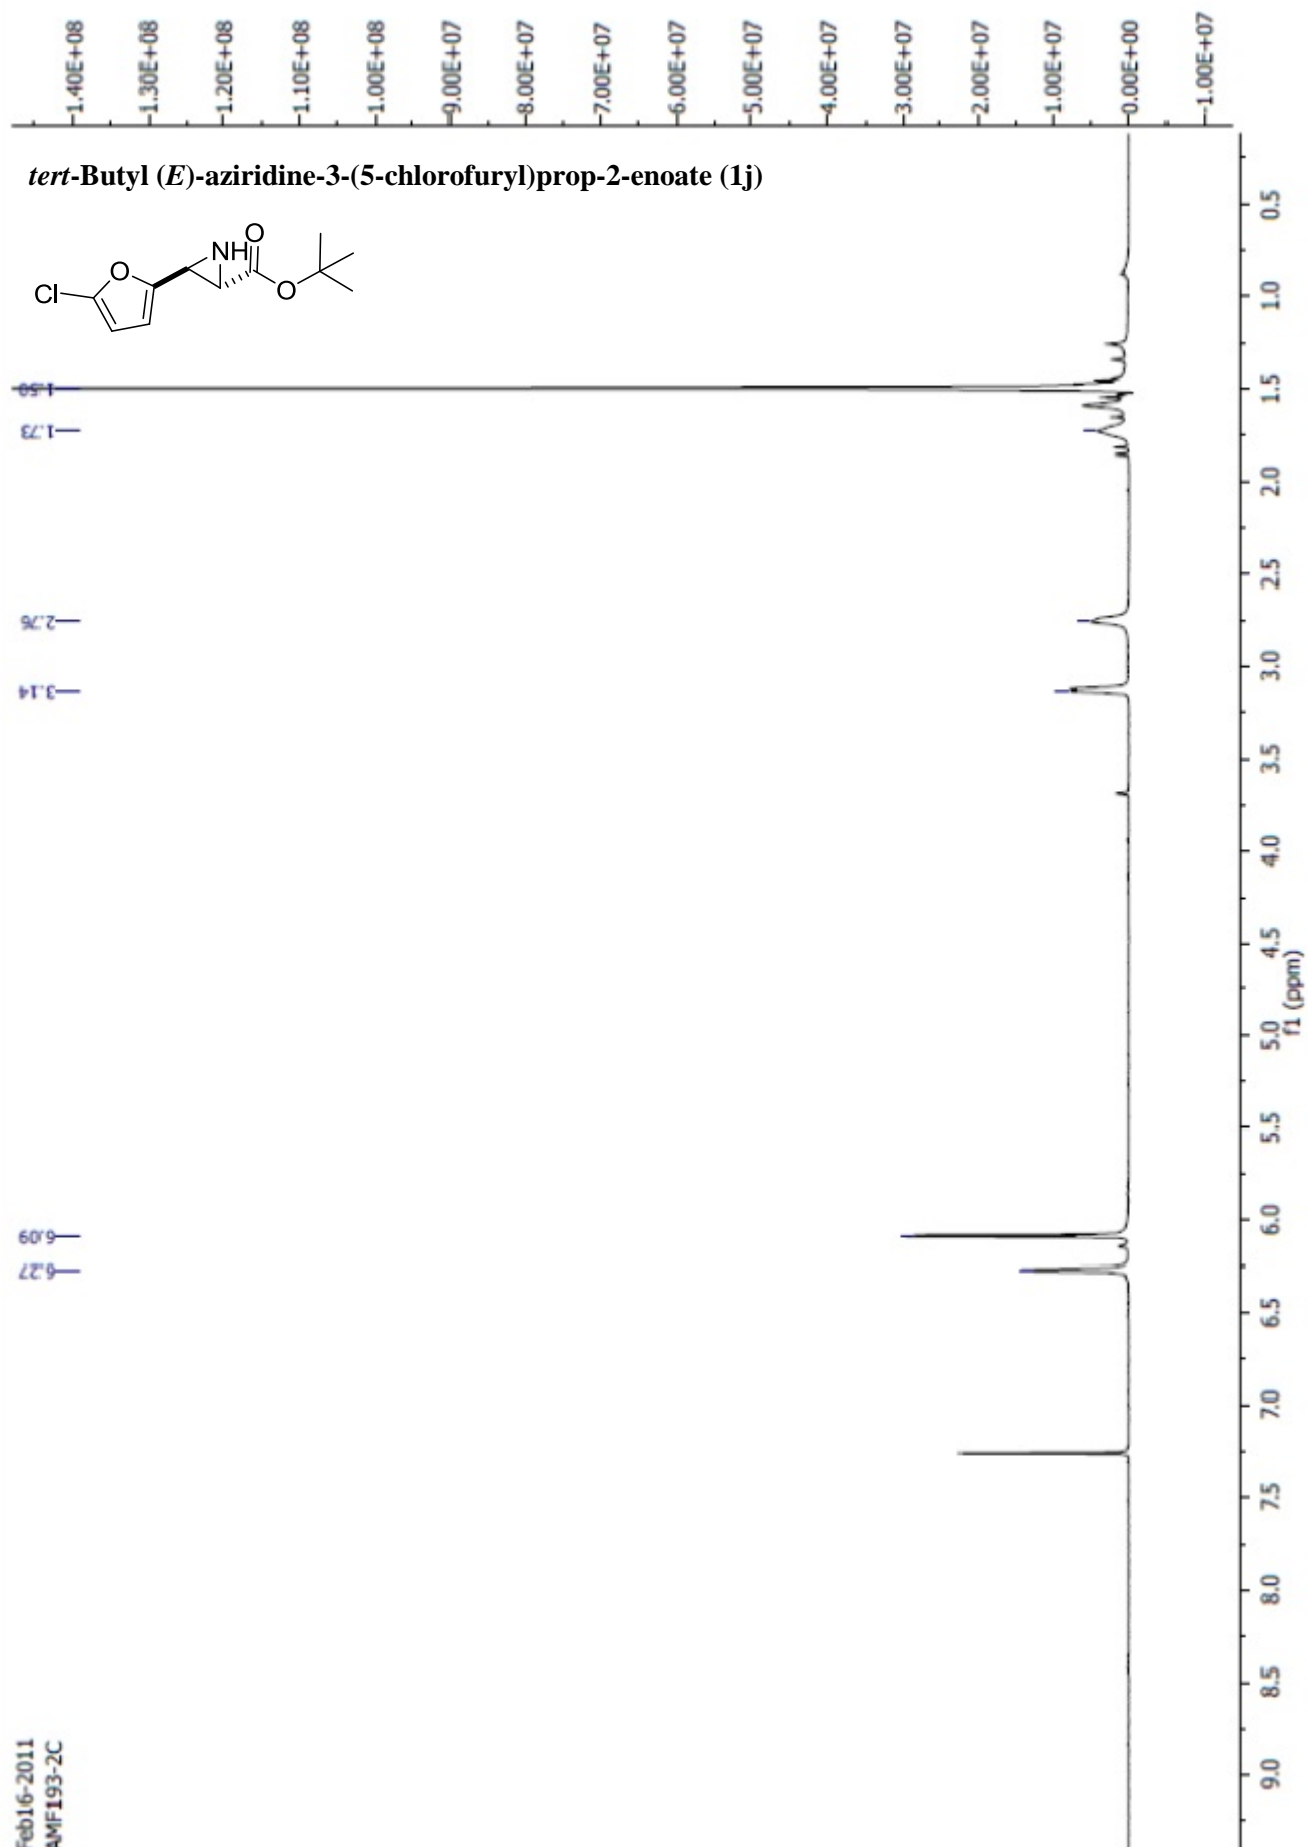

A Ferguson AMF193.2C in CDCl<sub>3</sub> ; 13C{1H} spectrum using DRX400 ; Feb18-2011

DRX-400

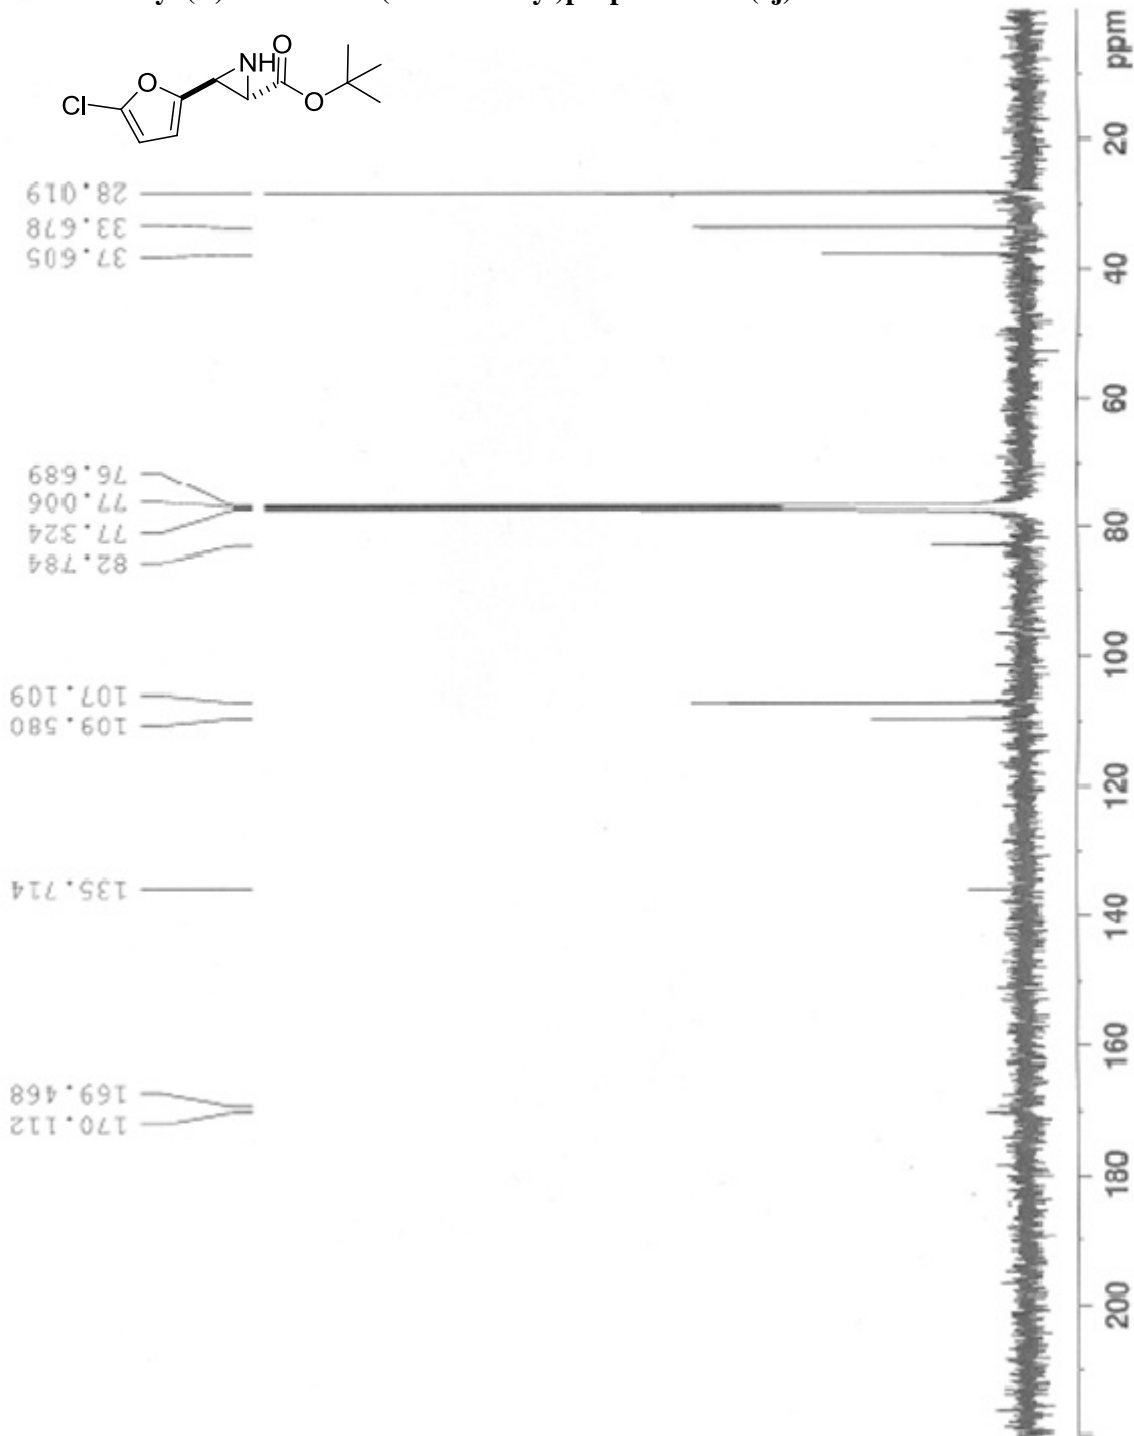

*tert*-Butyl (*E*)-aziridine-3-(5-chlorofuryl)prop-2-enoate (1j)

Current Data Parameters  
NAME Feb18-2011  
EXPNO 1  
PROCNO 2

F2 - Acquisition Parameters  
Date\_ 20110219  
Time 15.41  
INSTRUM spect  
PROBHD 5 mm BBO BB-1H  
PULPROG zgpg30  
TD 32768  
SOLVENT CDCl<sub>3</sub>  
NS 9441  
DS 4  
SWH 33344.588 Hz  
FIDRES 0.860379 Hz  
AQ 0.5800436 sec  
RG 10241.3  
DC 17.700 usec  
DE 6.00 usec  
TE 300.0 K  
D1 1.0000000 sec  
d11 0.0300000 sec  
DELTA 0.8899998 sec  
TD0 30

===== CHANNEL f1 =====  
NUC1 13C  
P1 7.90 usec  
PL1 0.00 dB  
SFO1 100.6228303 MHz

===== CHANNEL f2 =====  
CPDPRG2 waltz16  
NUC2 1H  
P2 75.00 usec  
PL2 0.00 dB  
PL12 19.80 dB  
PL13 19.80 dB  
SFO2 400.1316005 MHz

F2 - Processing parameters  
SI 65536  
SF 100.6127700 MHz  
WDW EN  
SSB 0  
LB 2.50 Hz  
GB 0  
PC 3.40



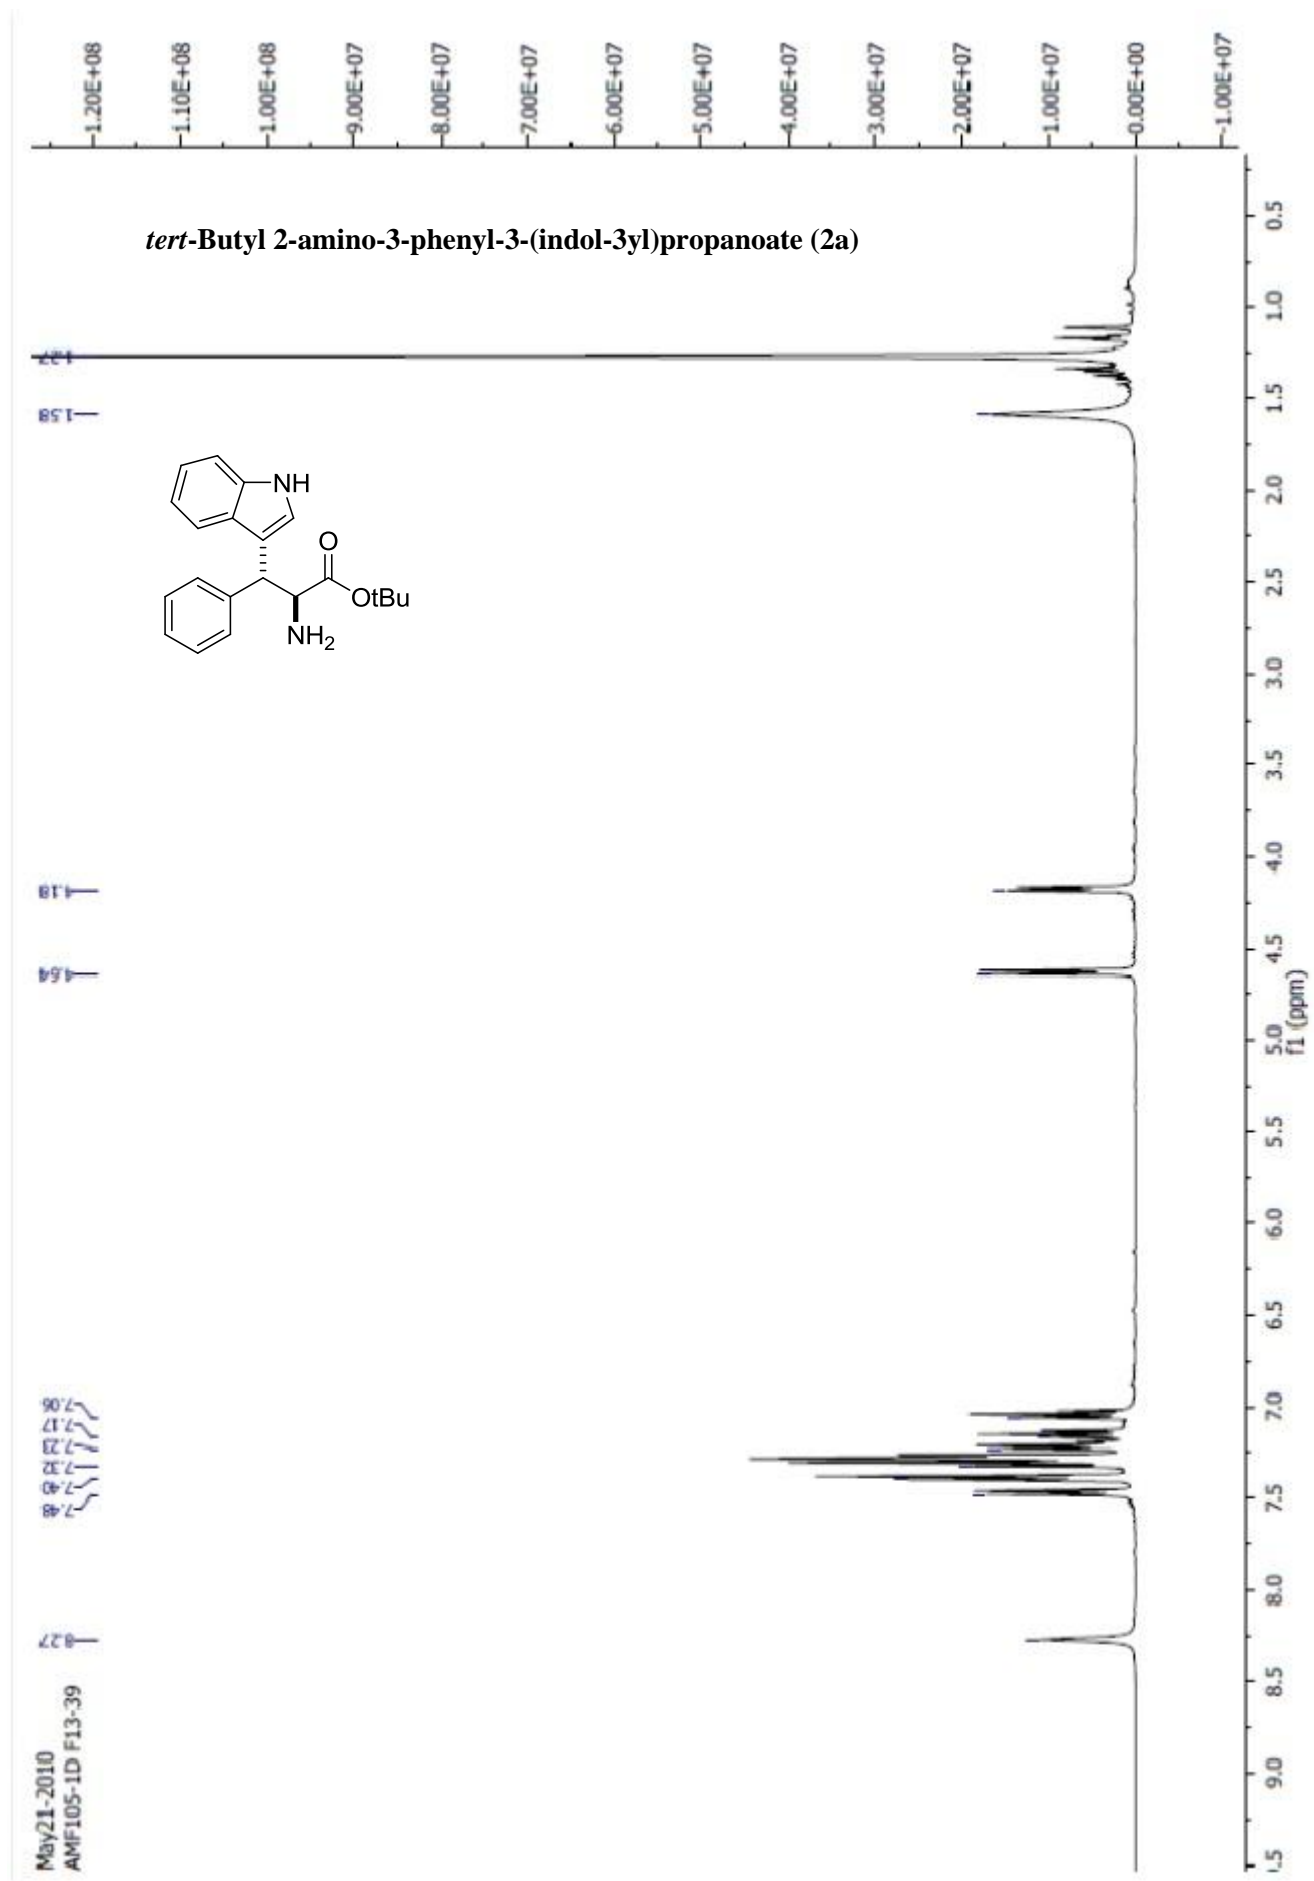

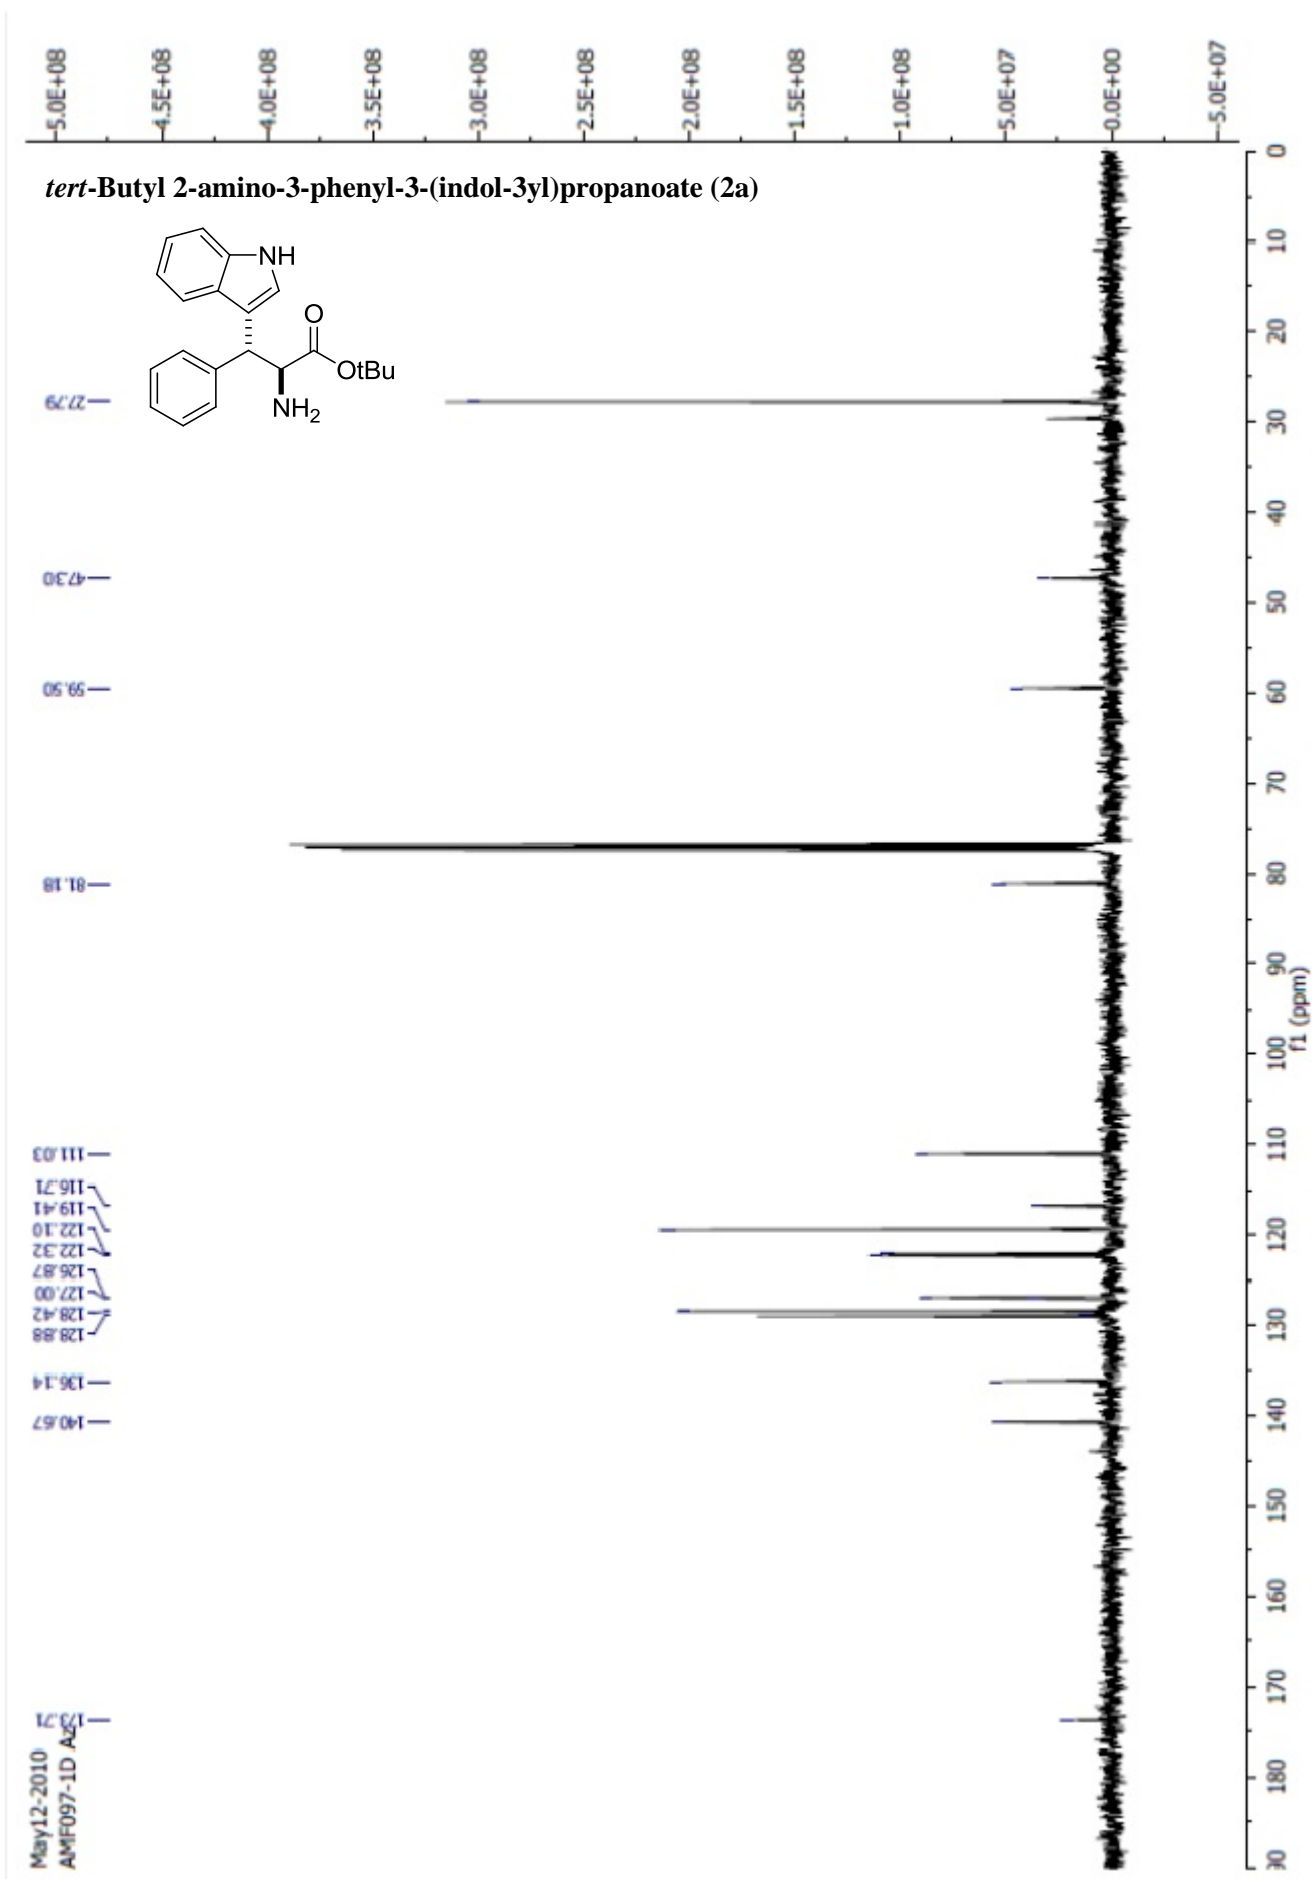

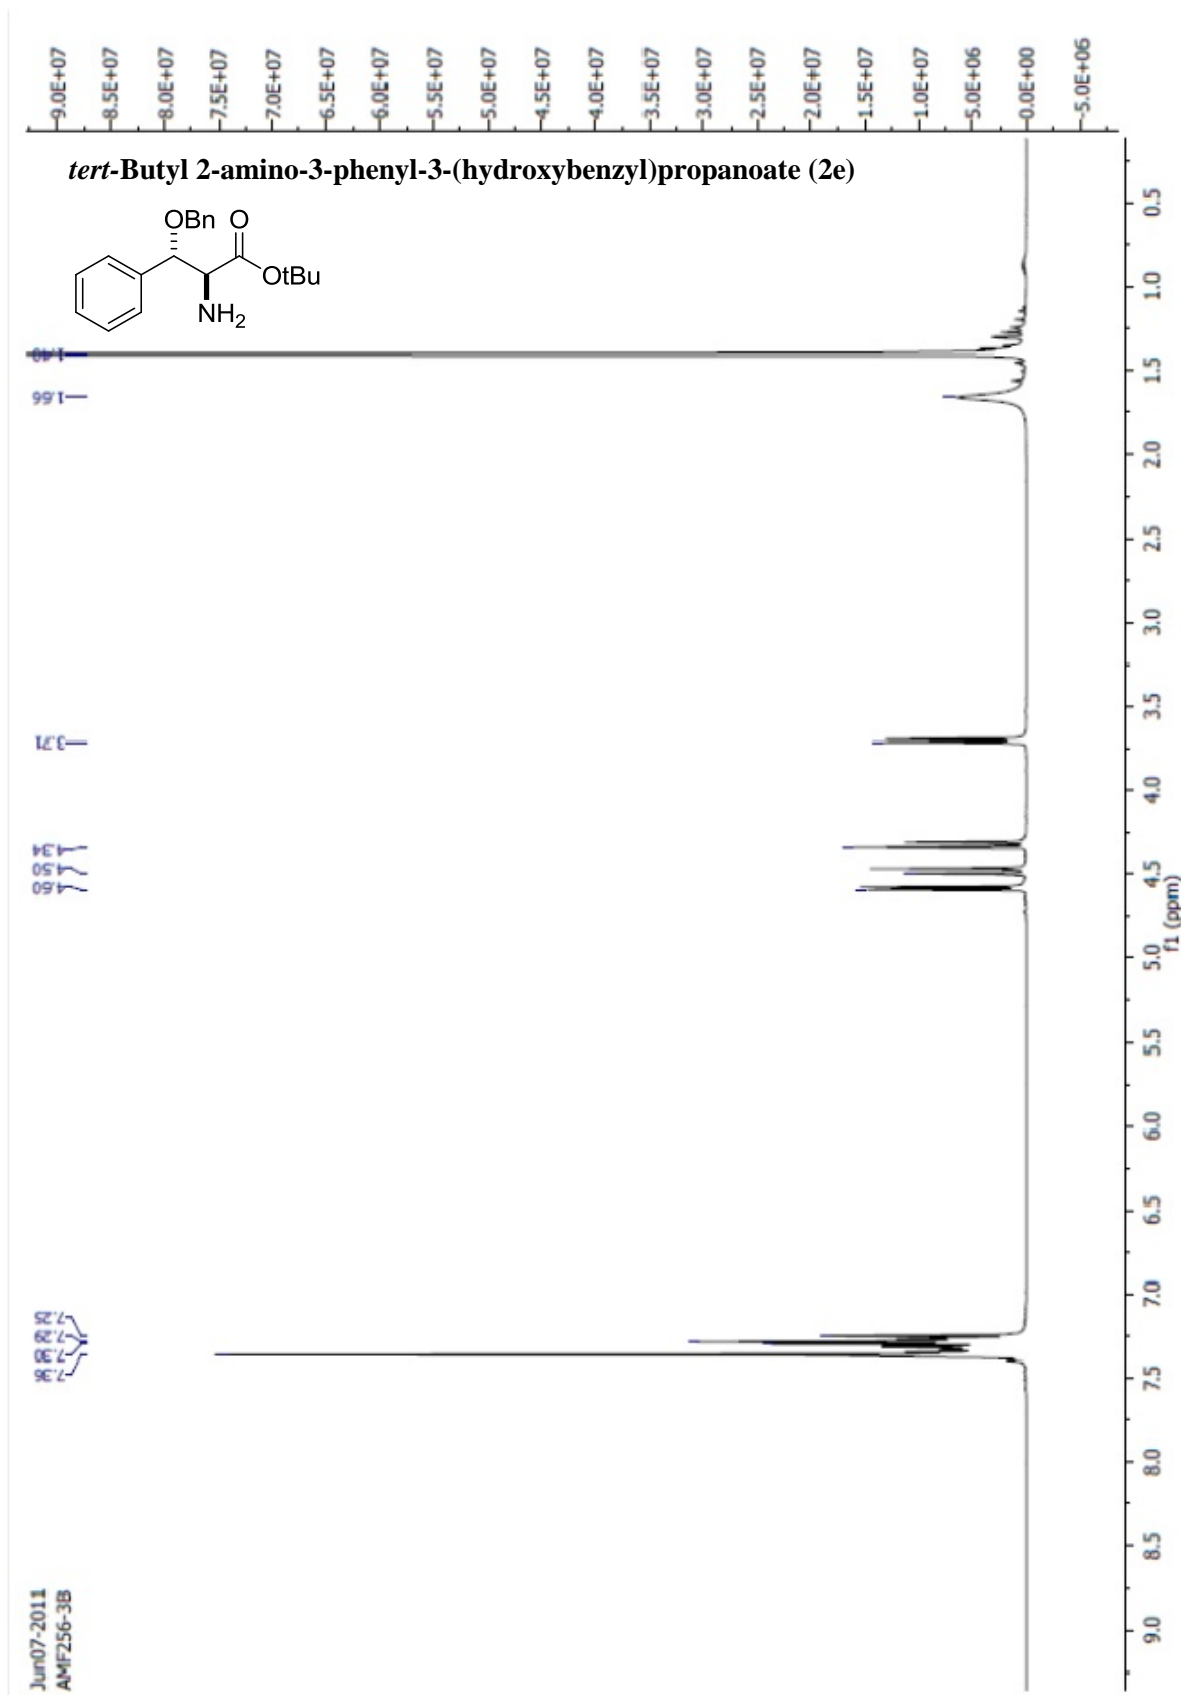

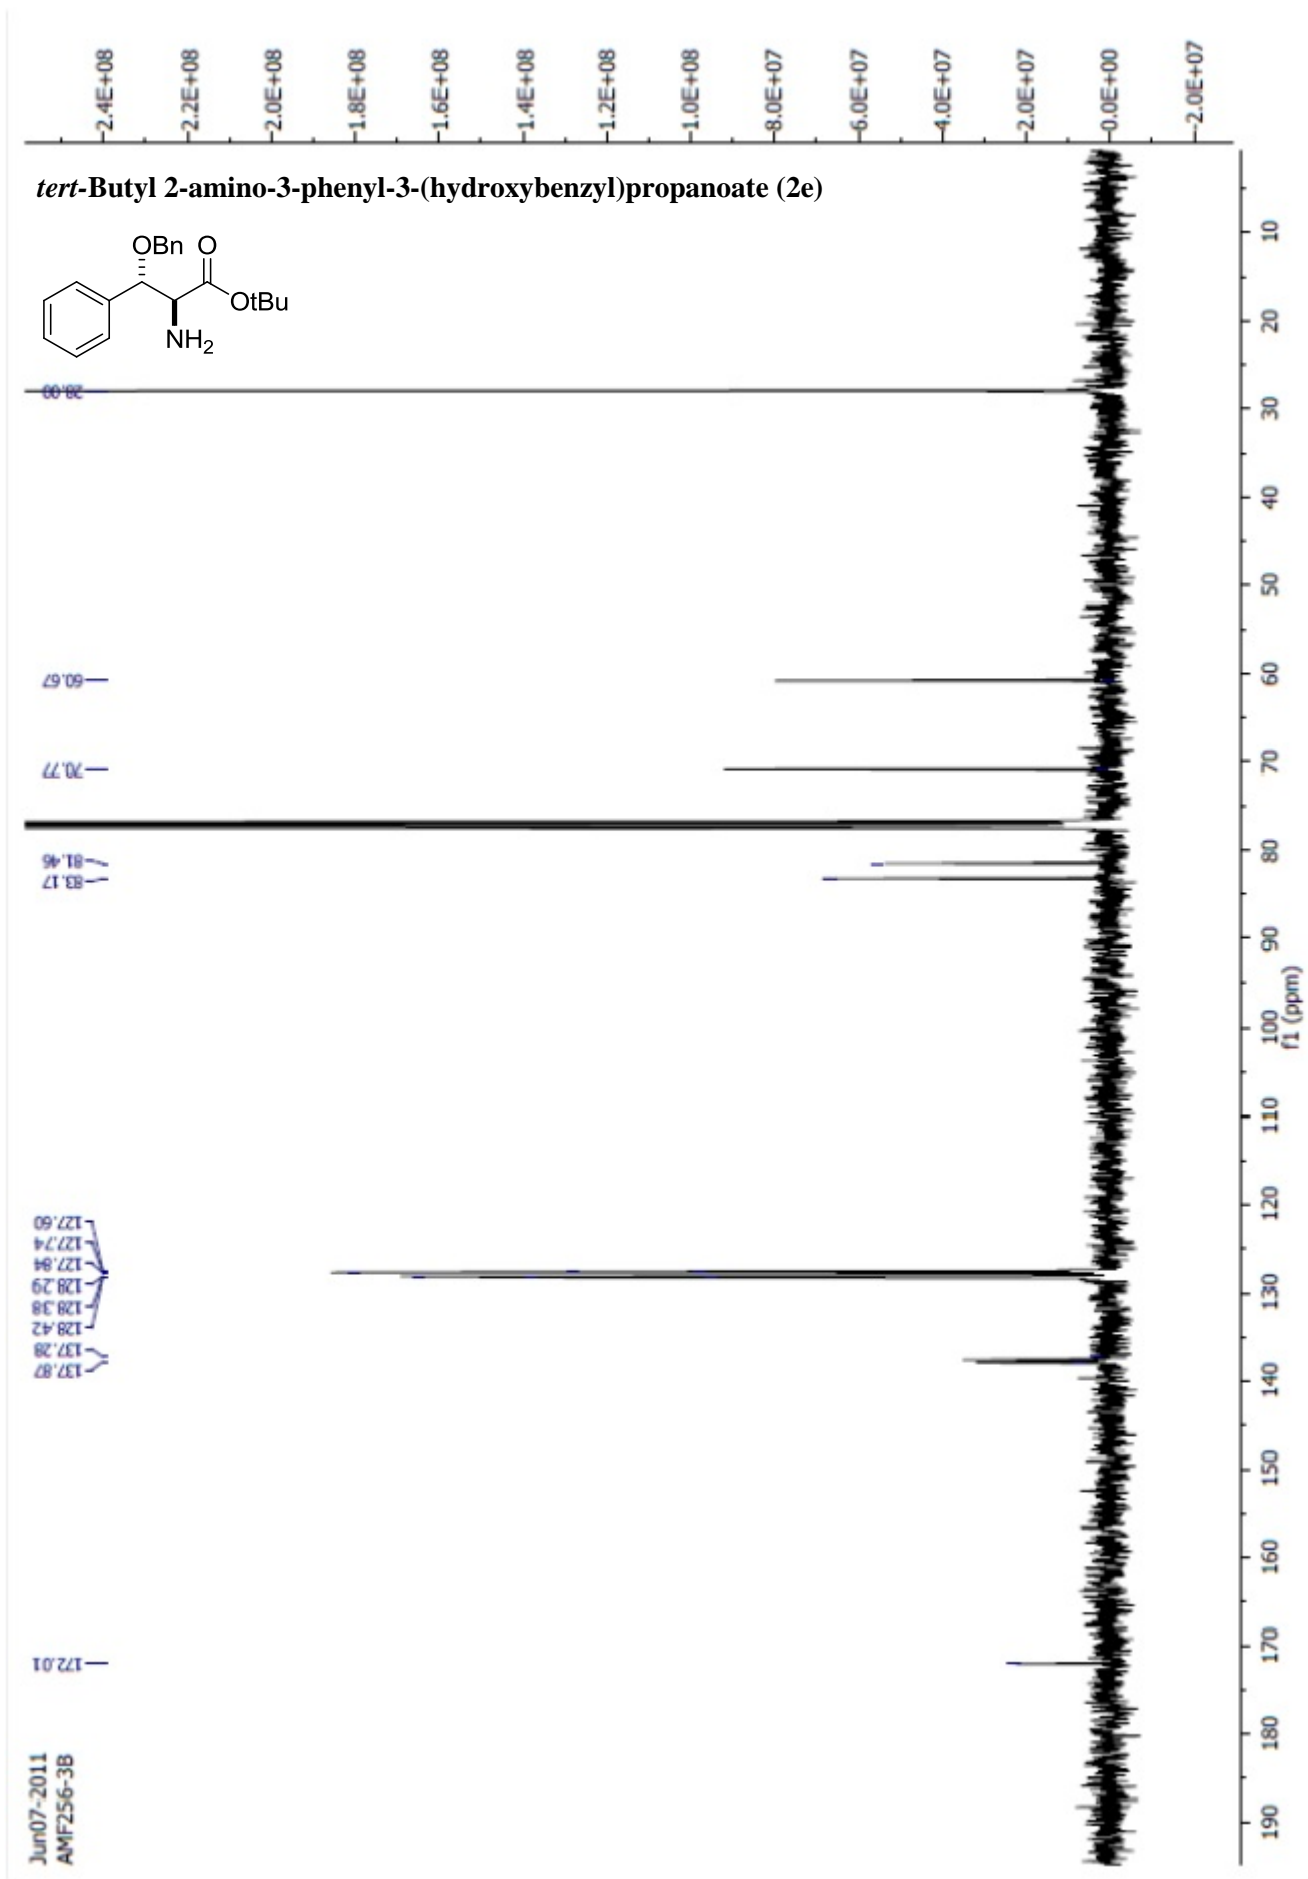



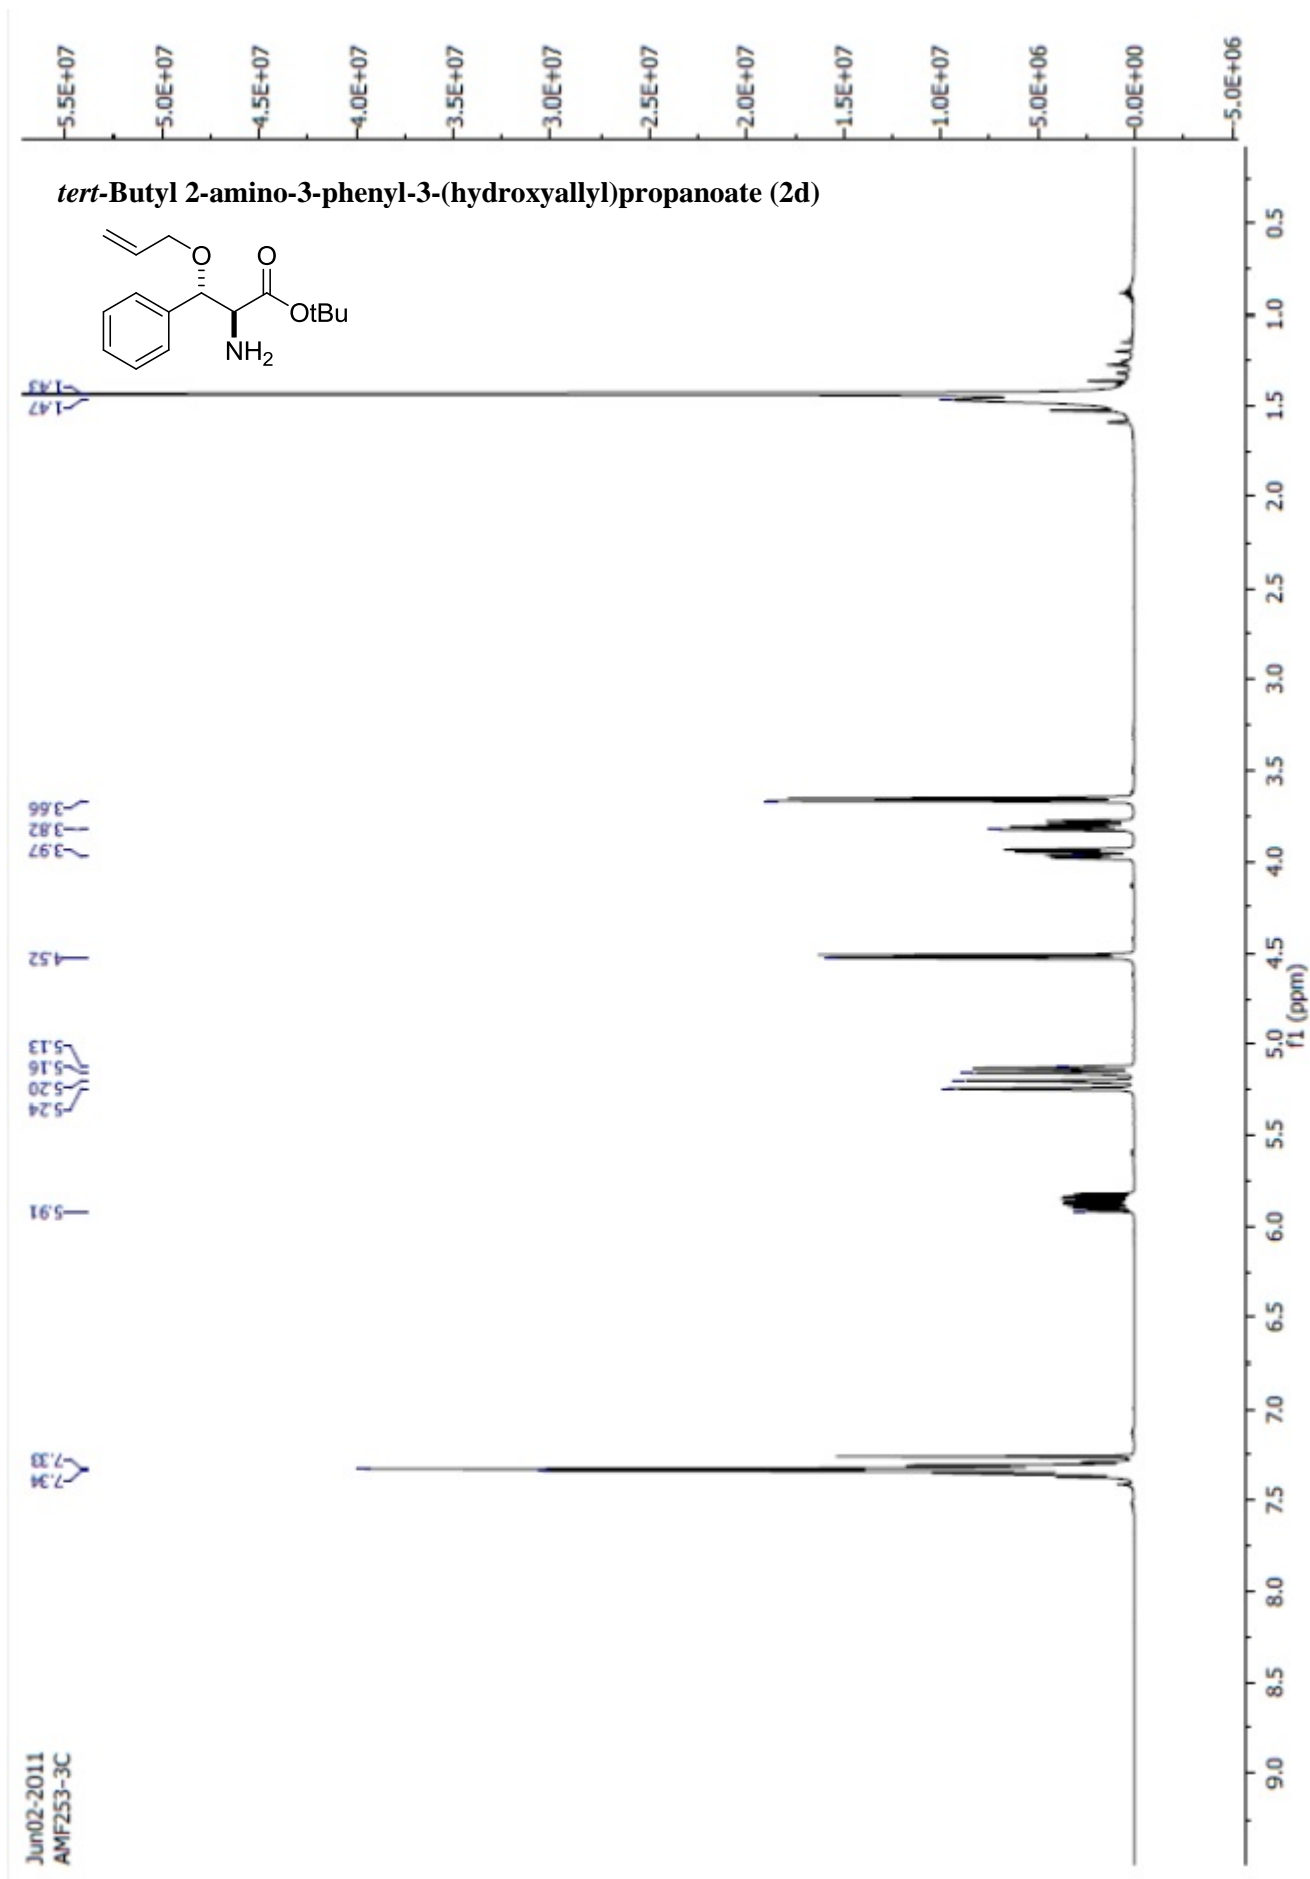

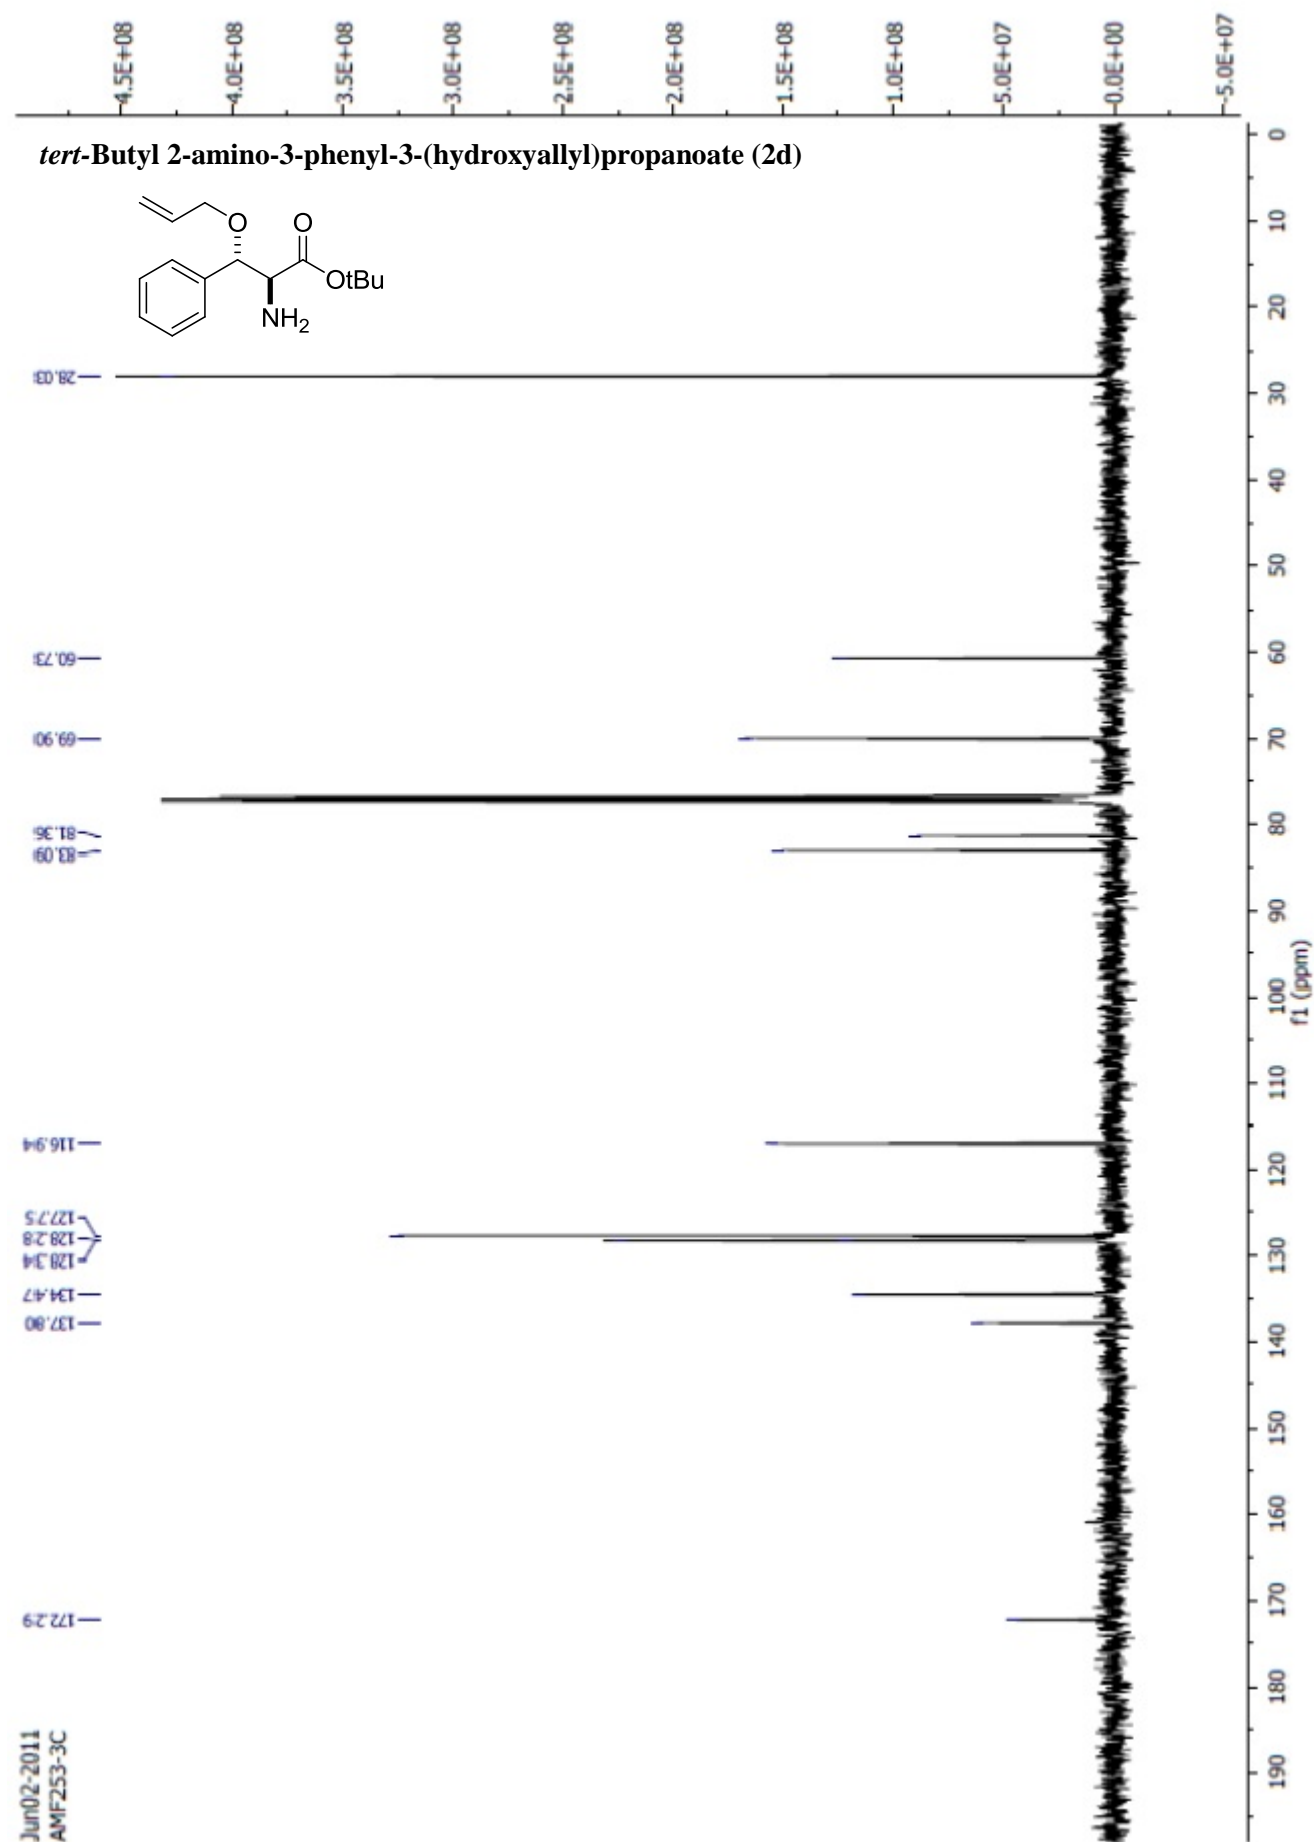

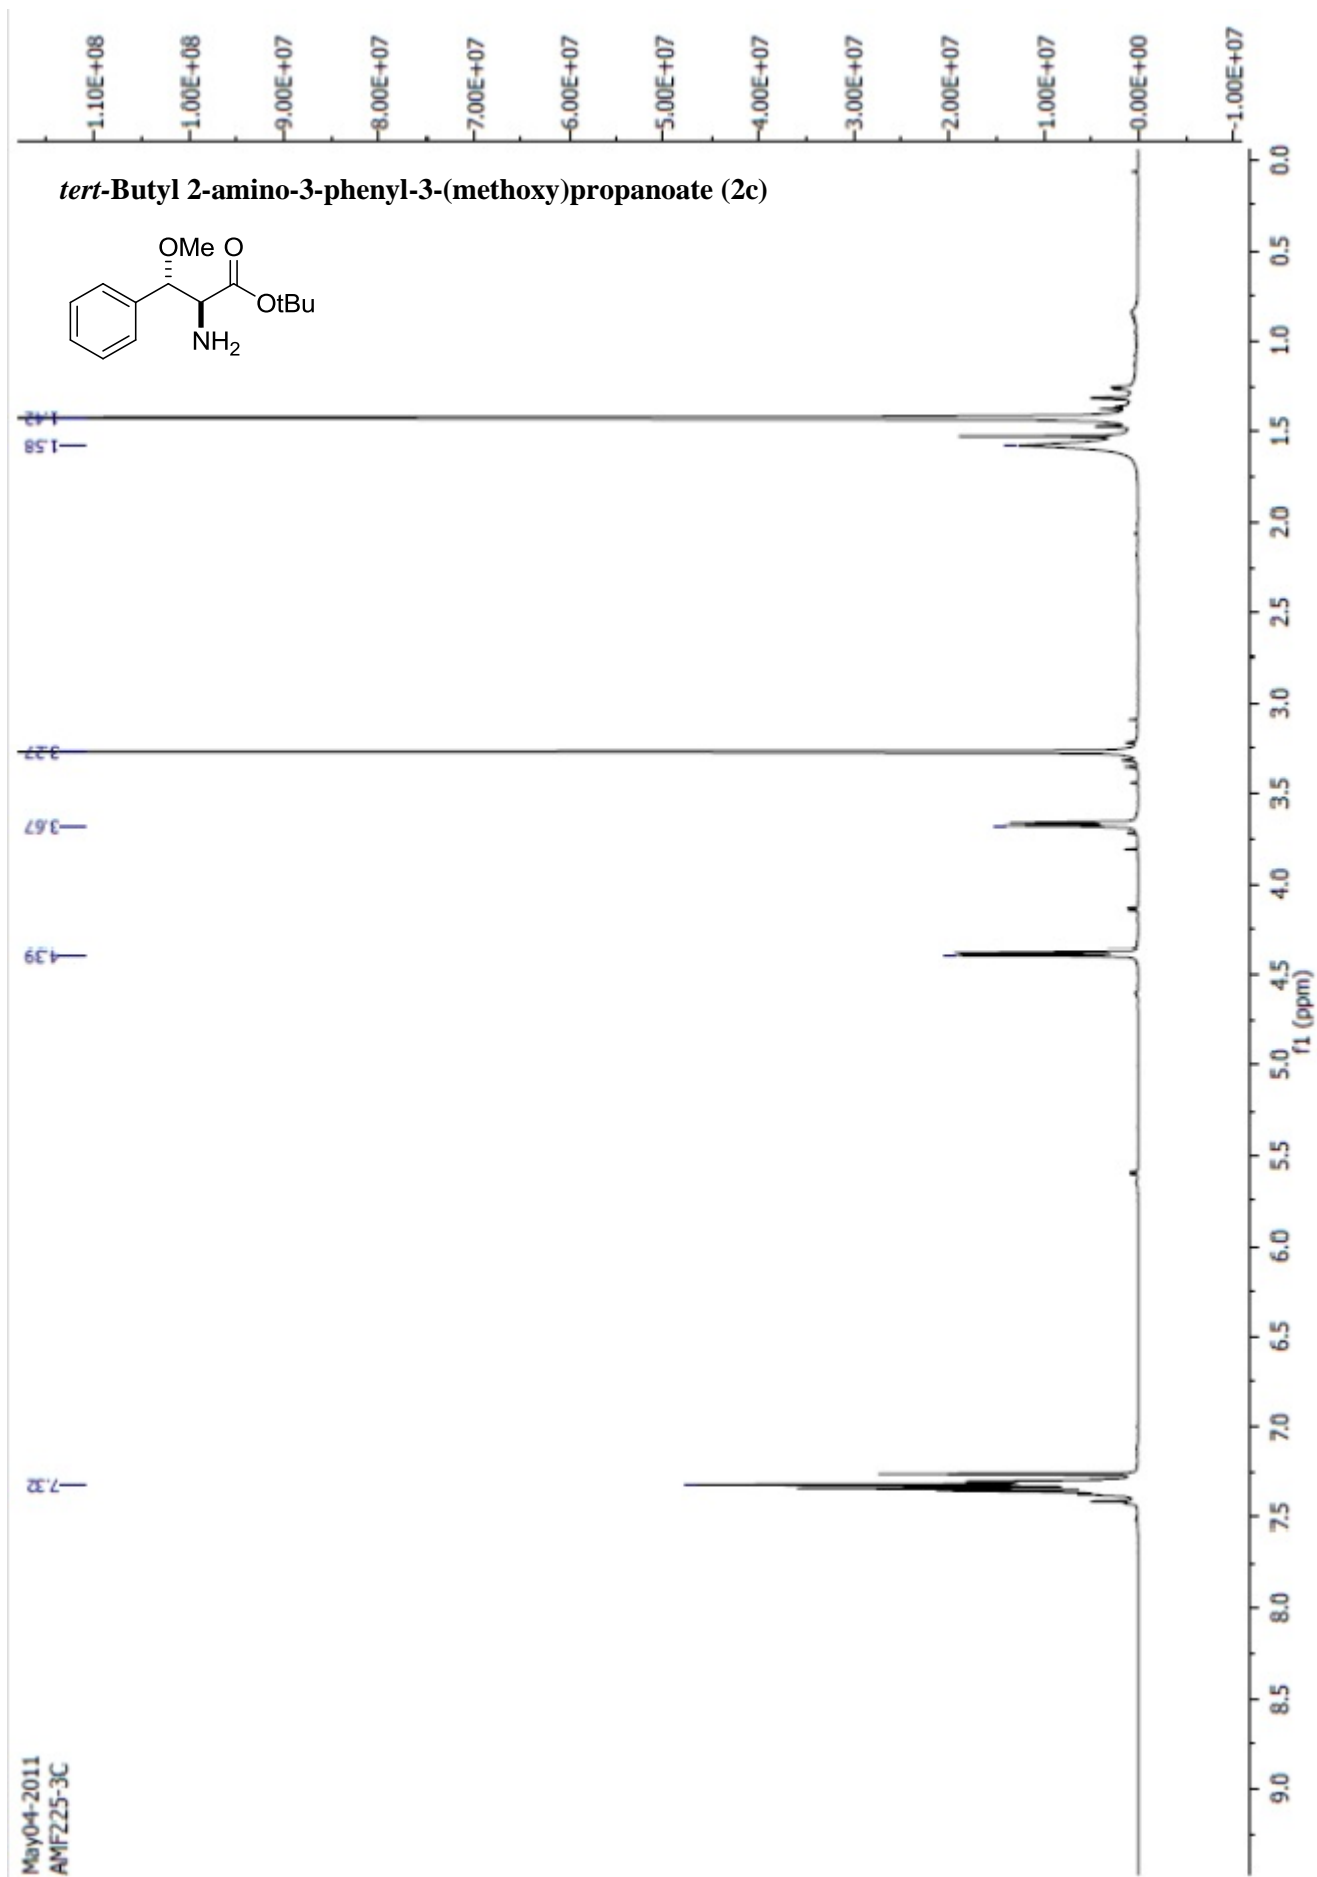

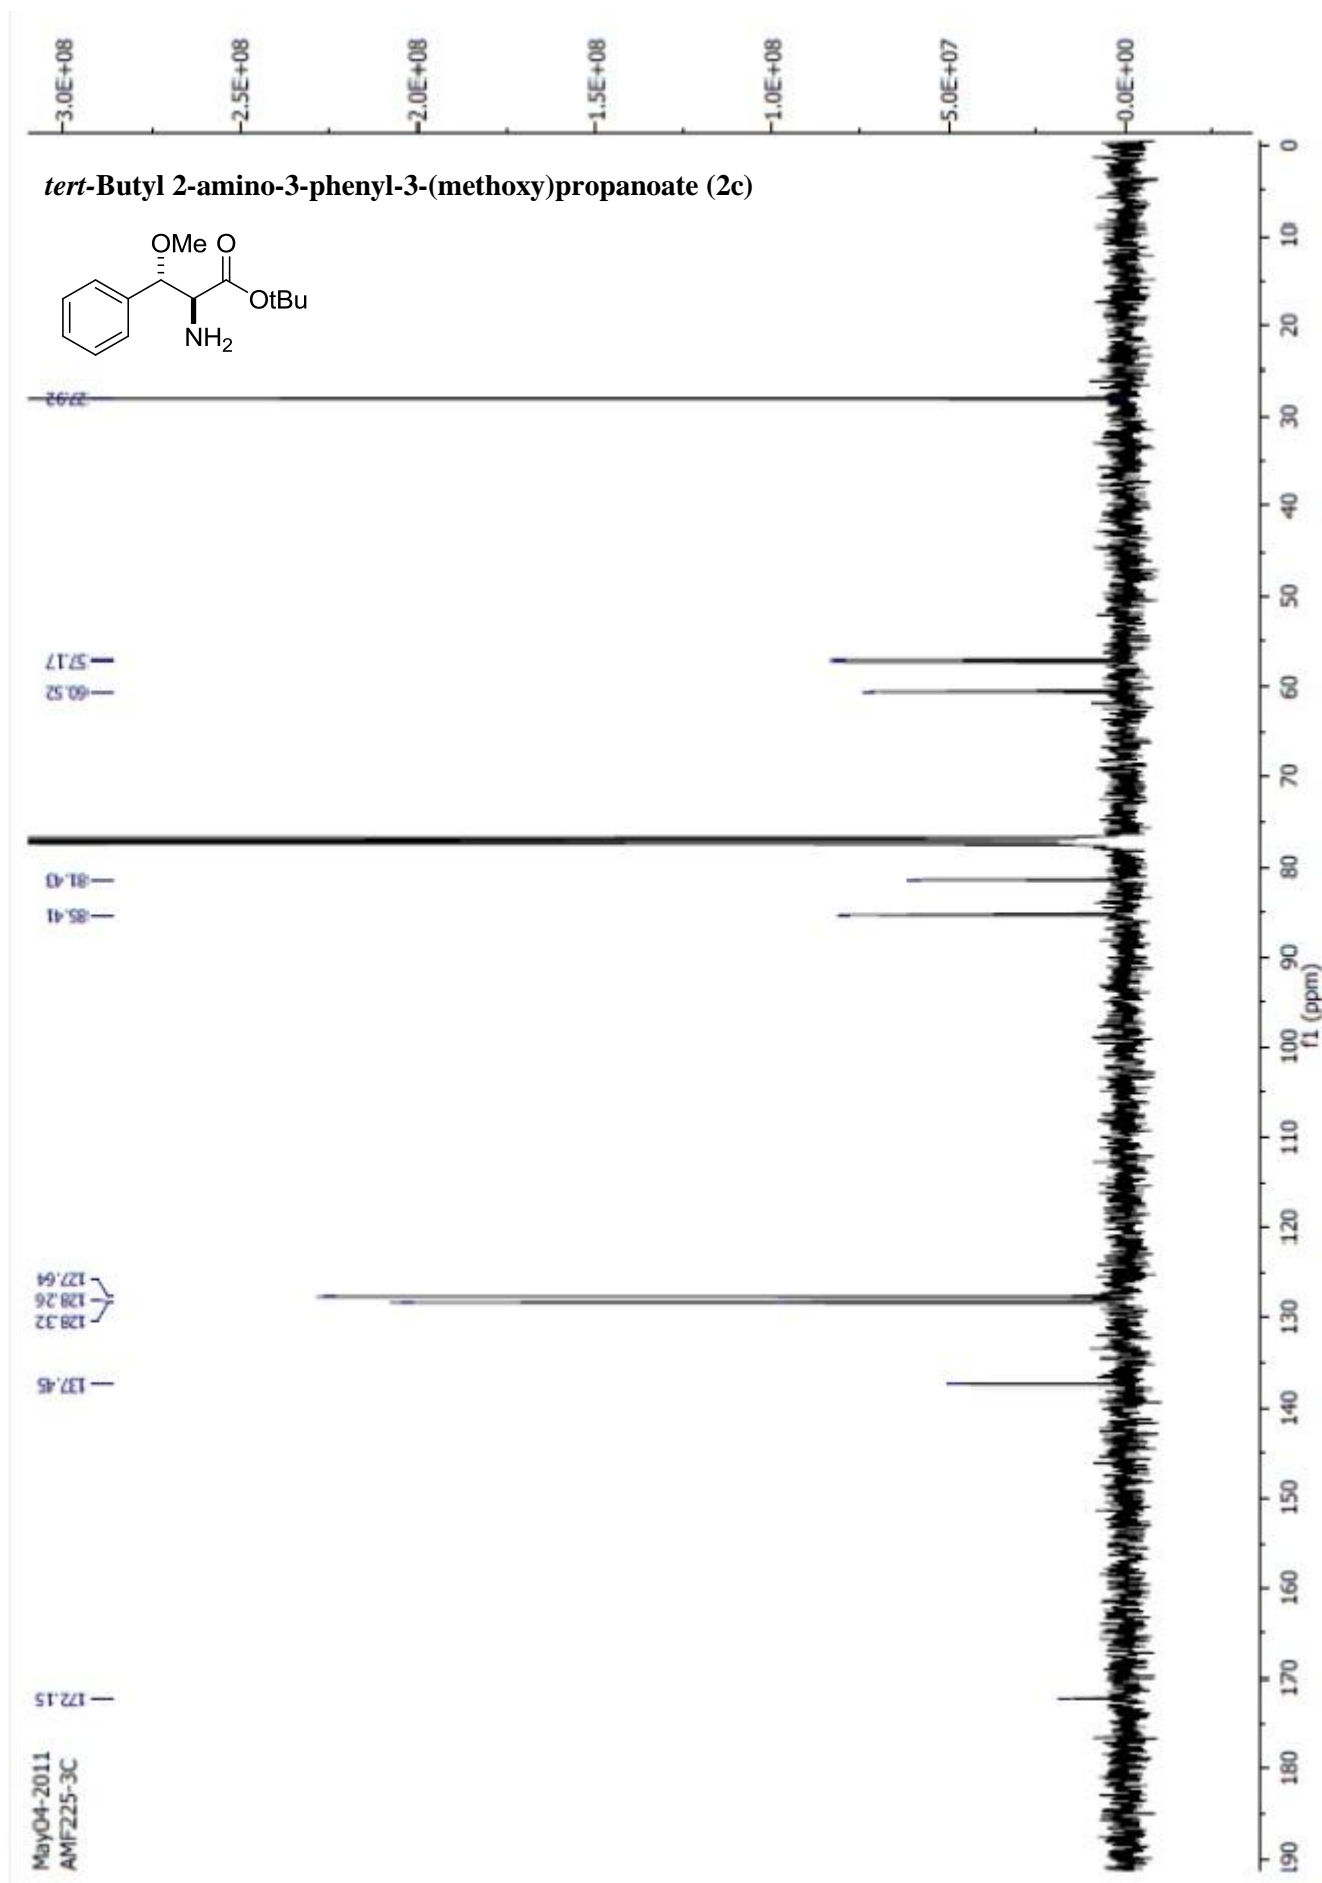

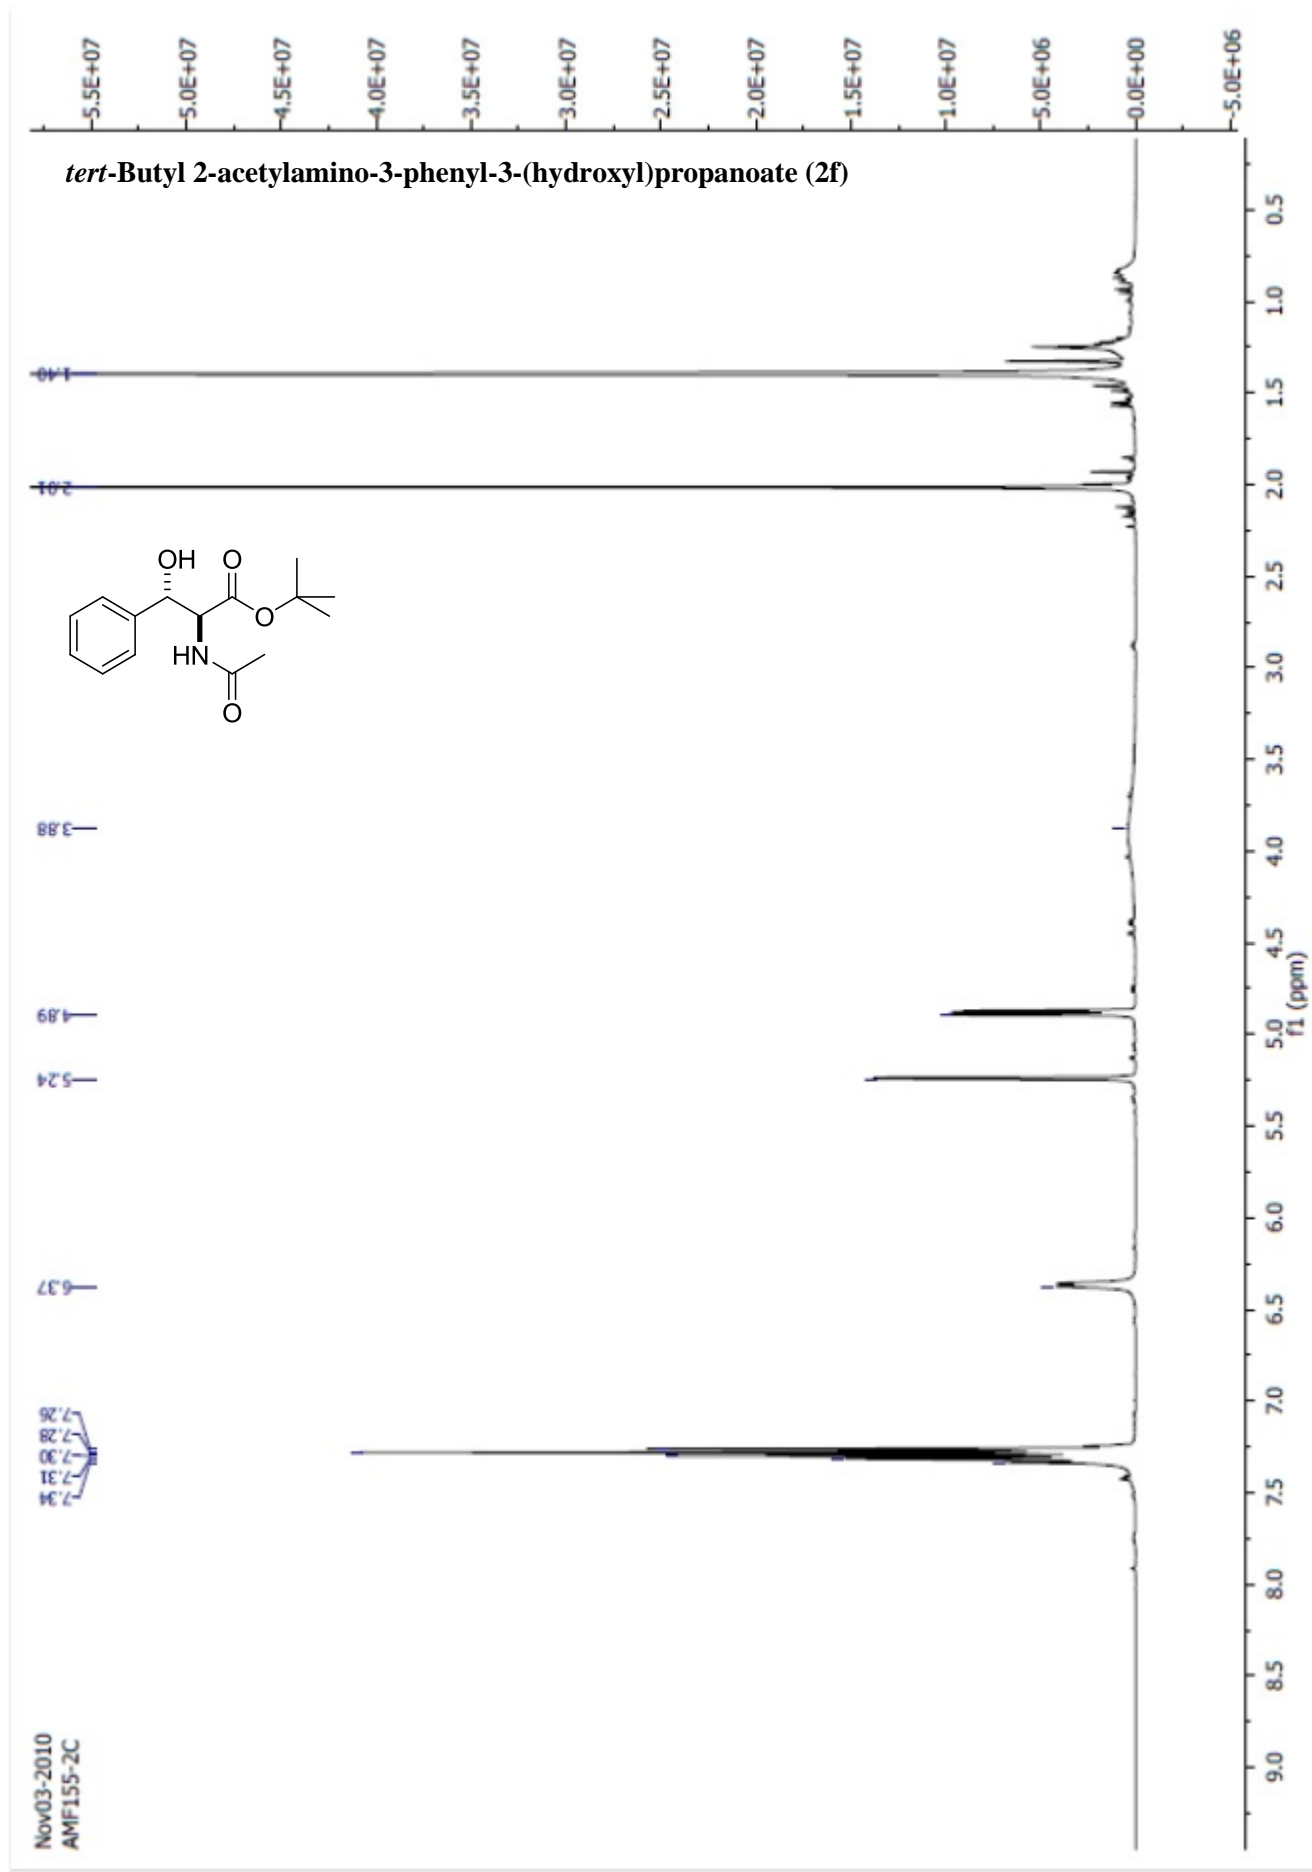

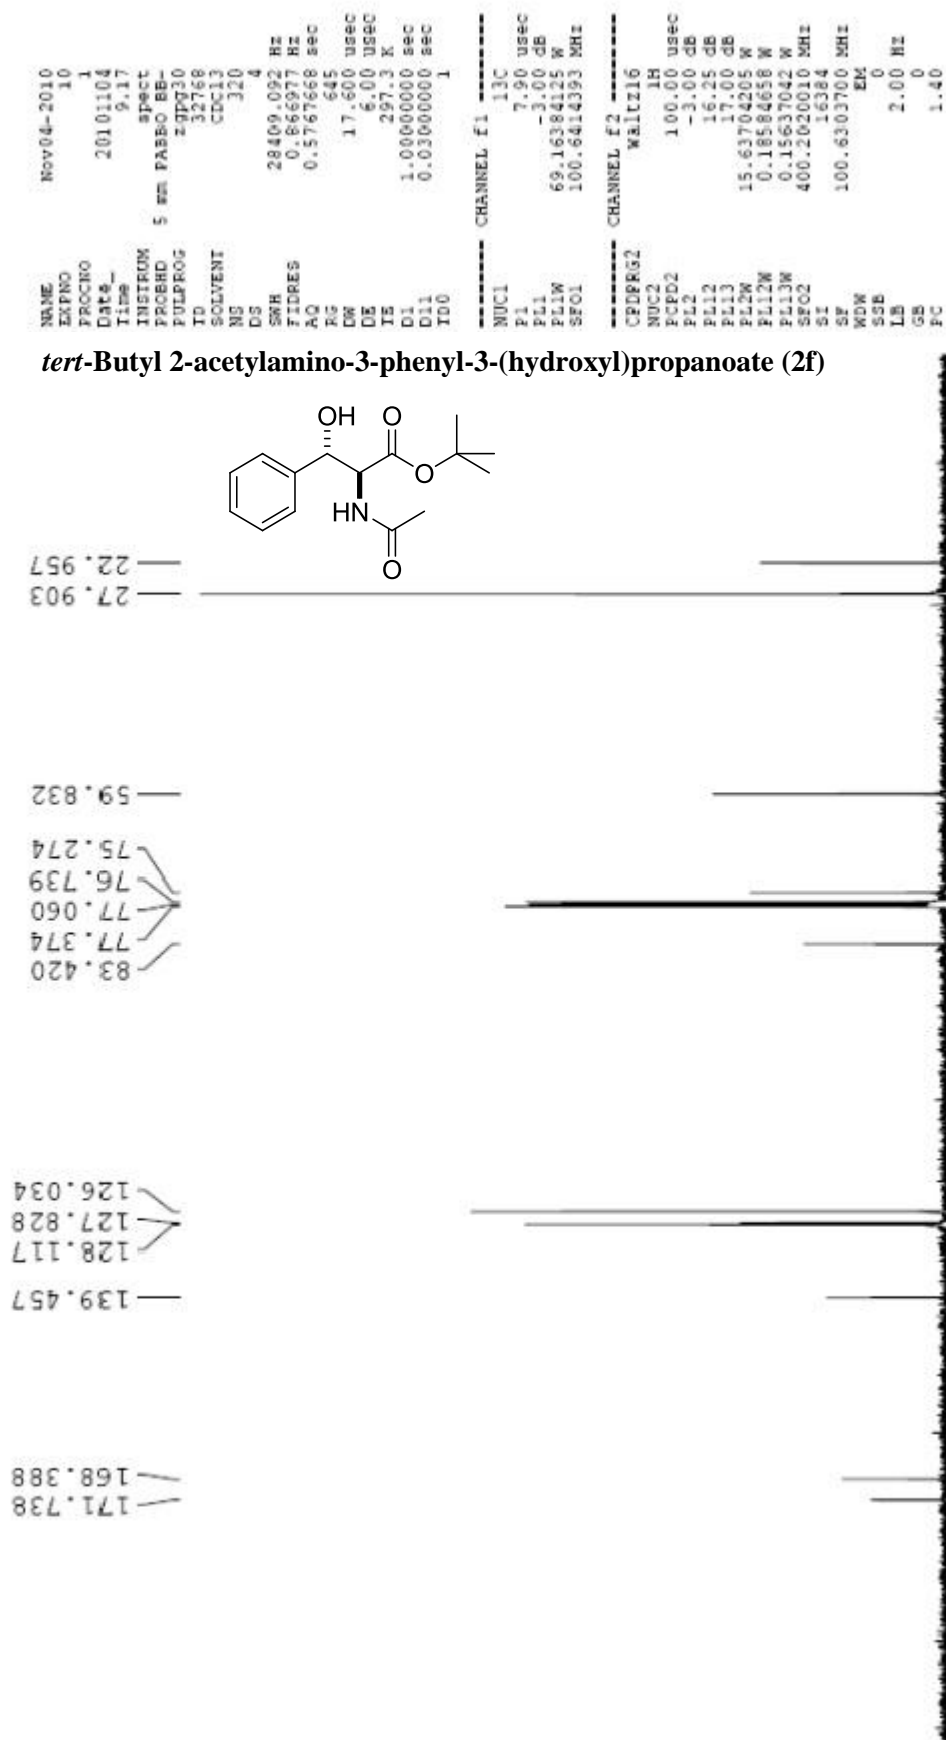

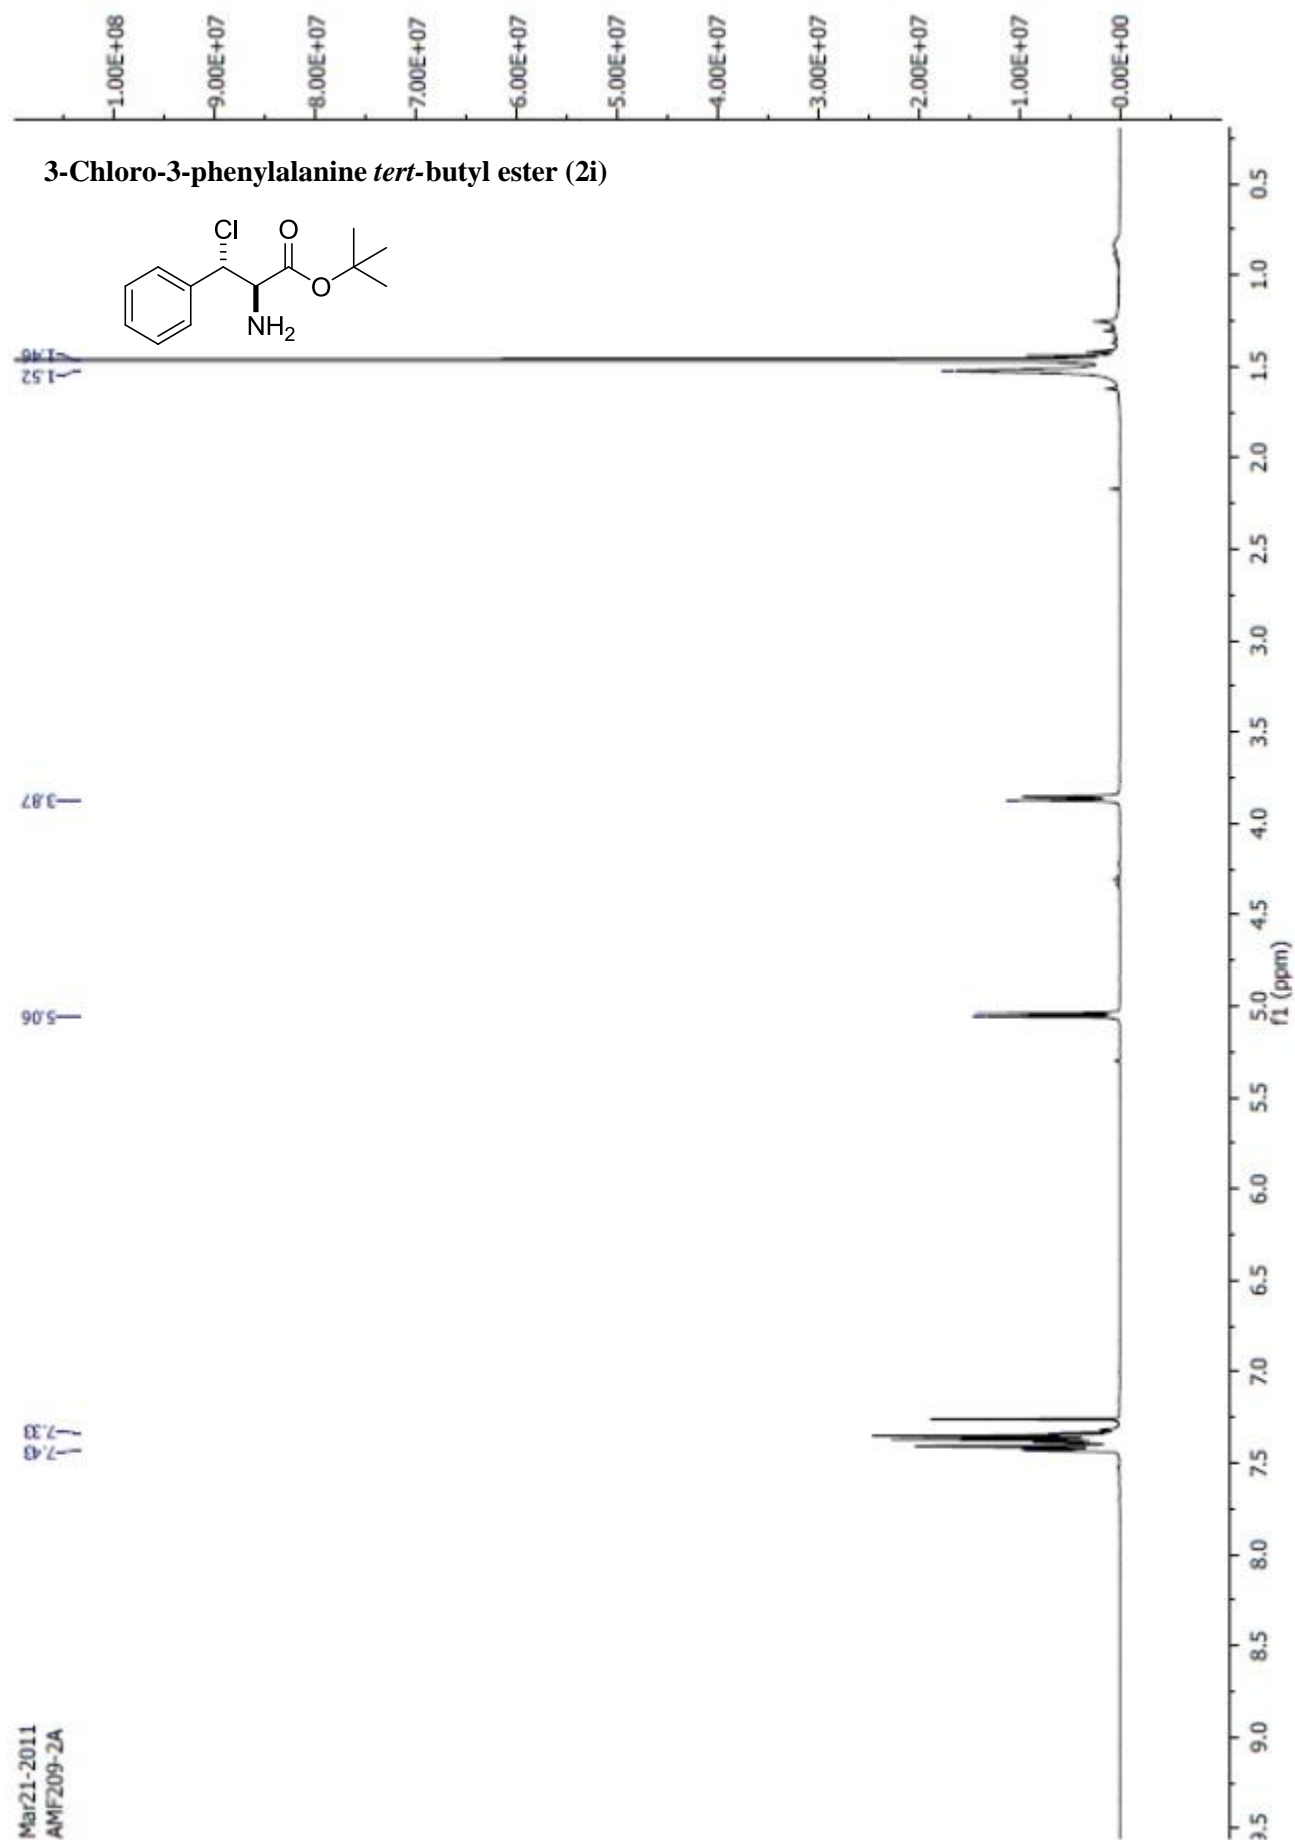

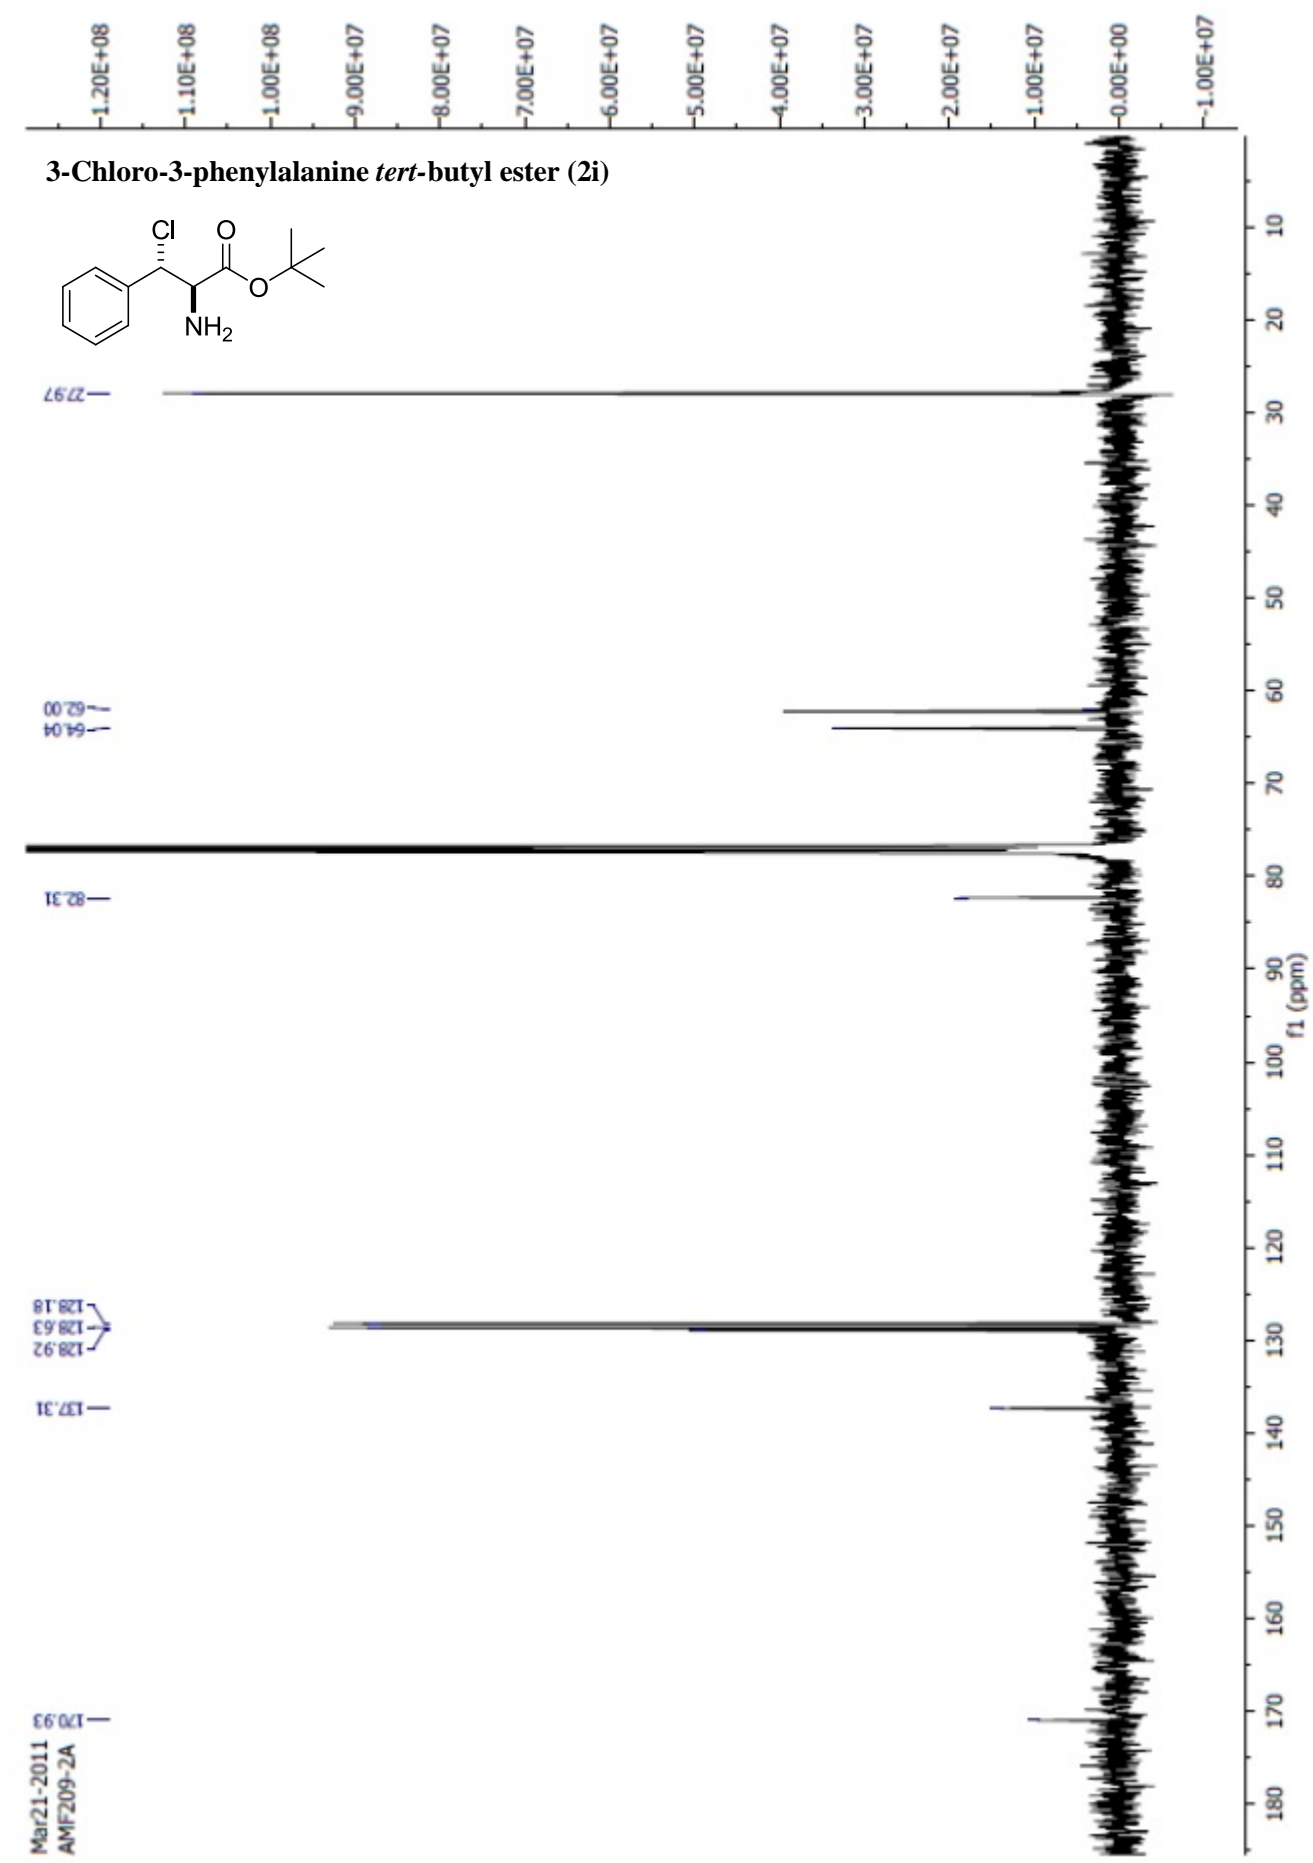



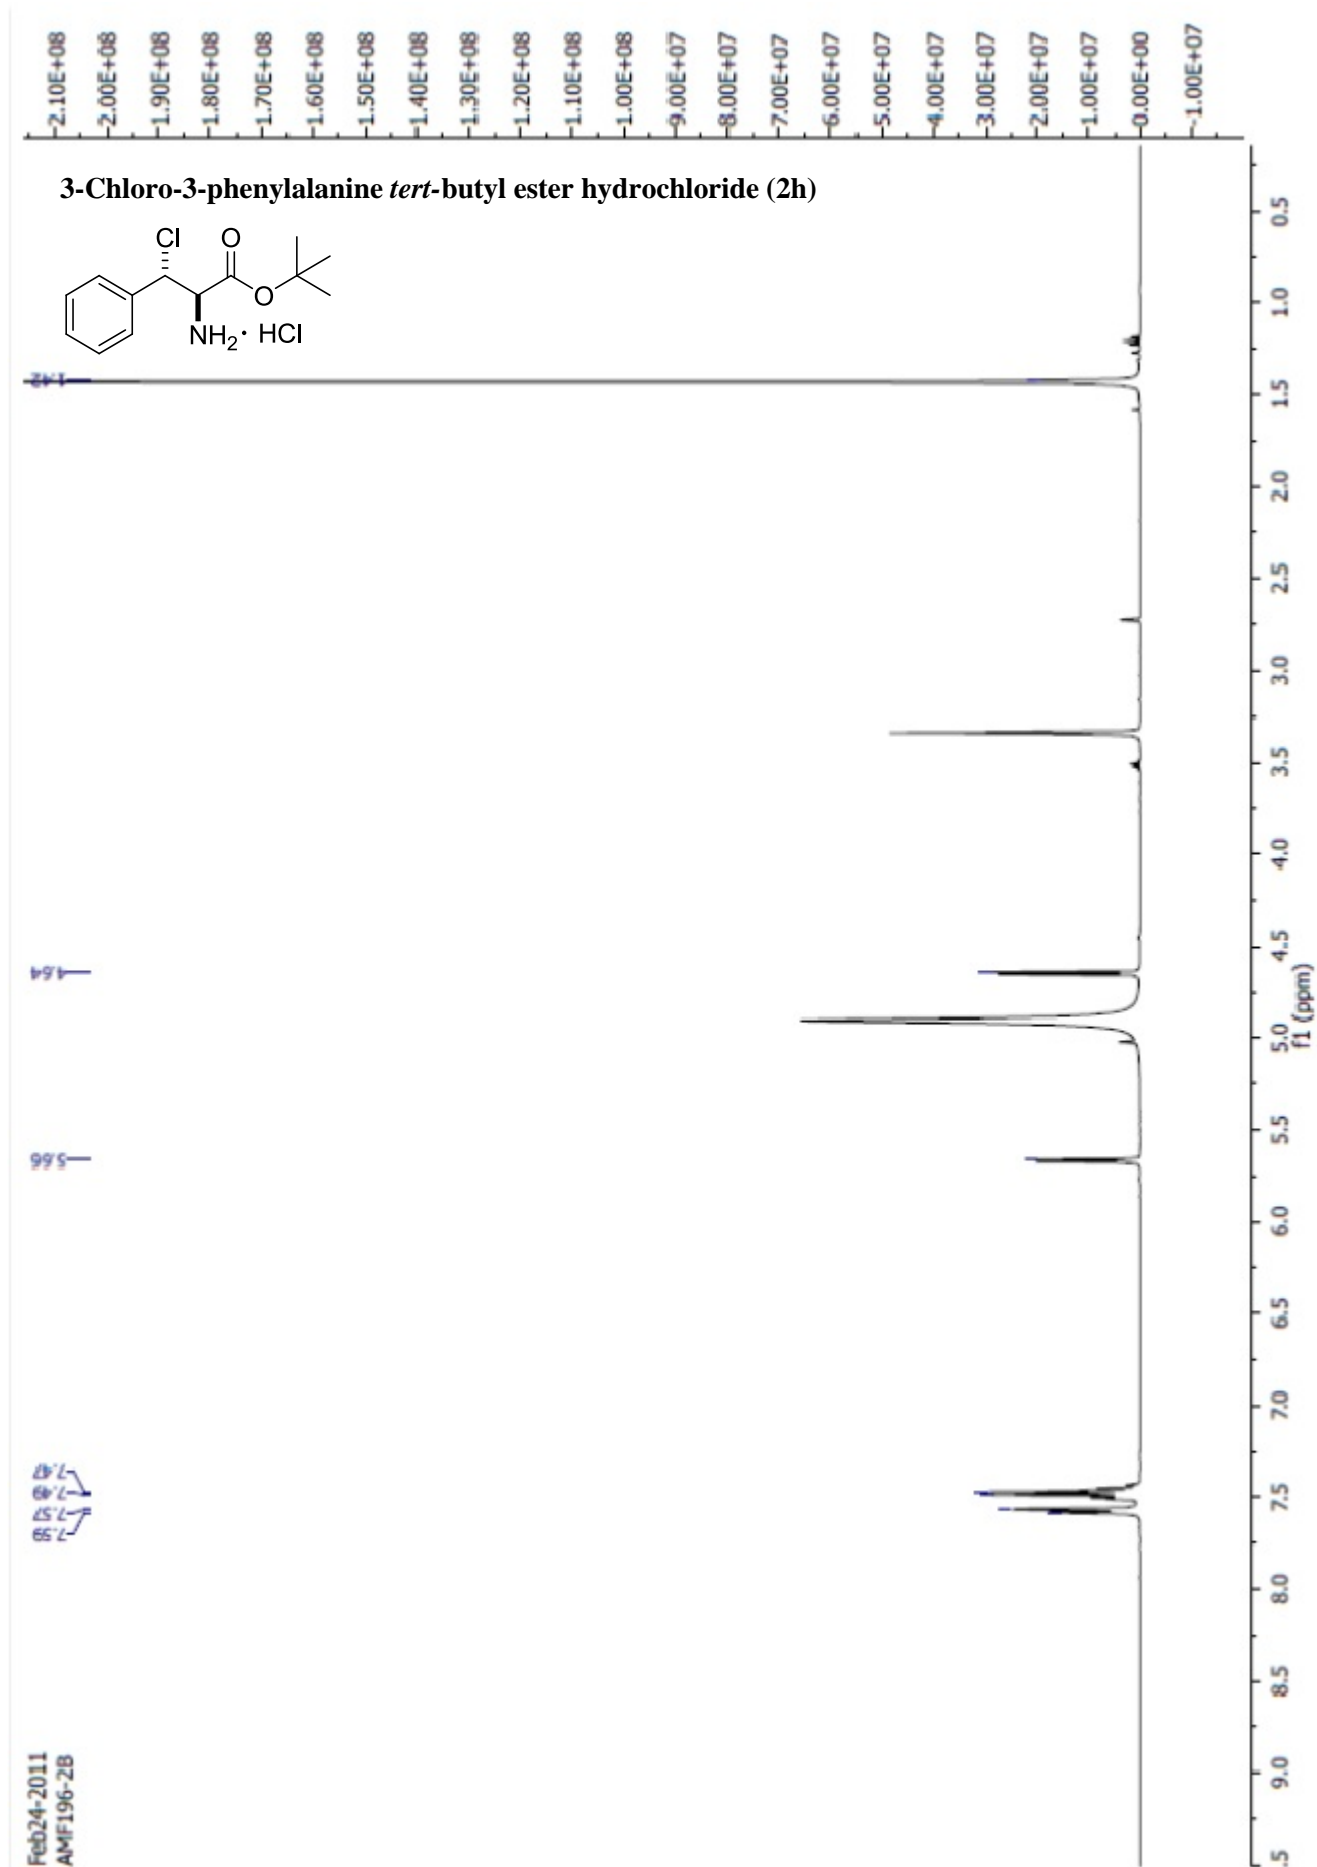

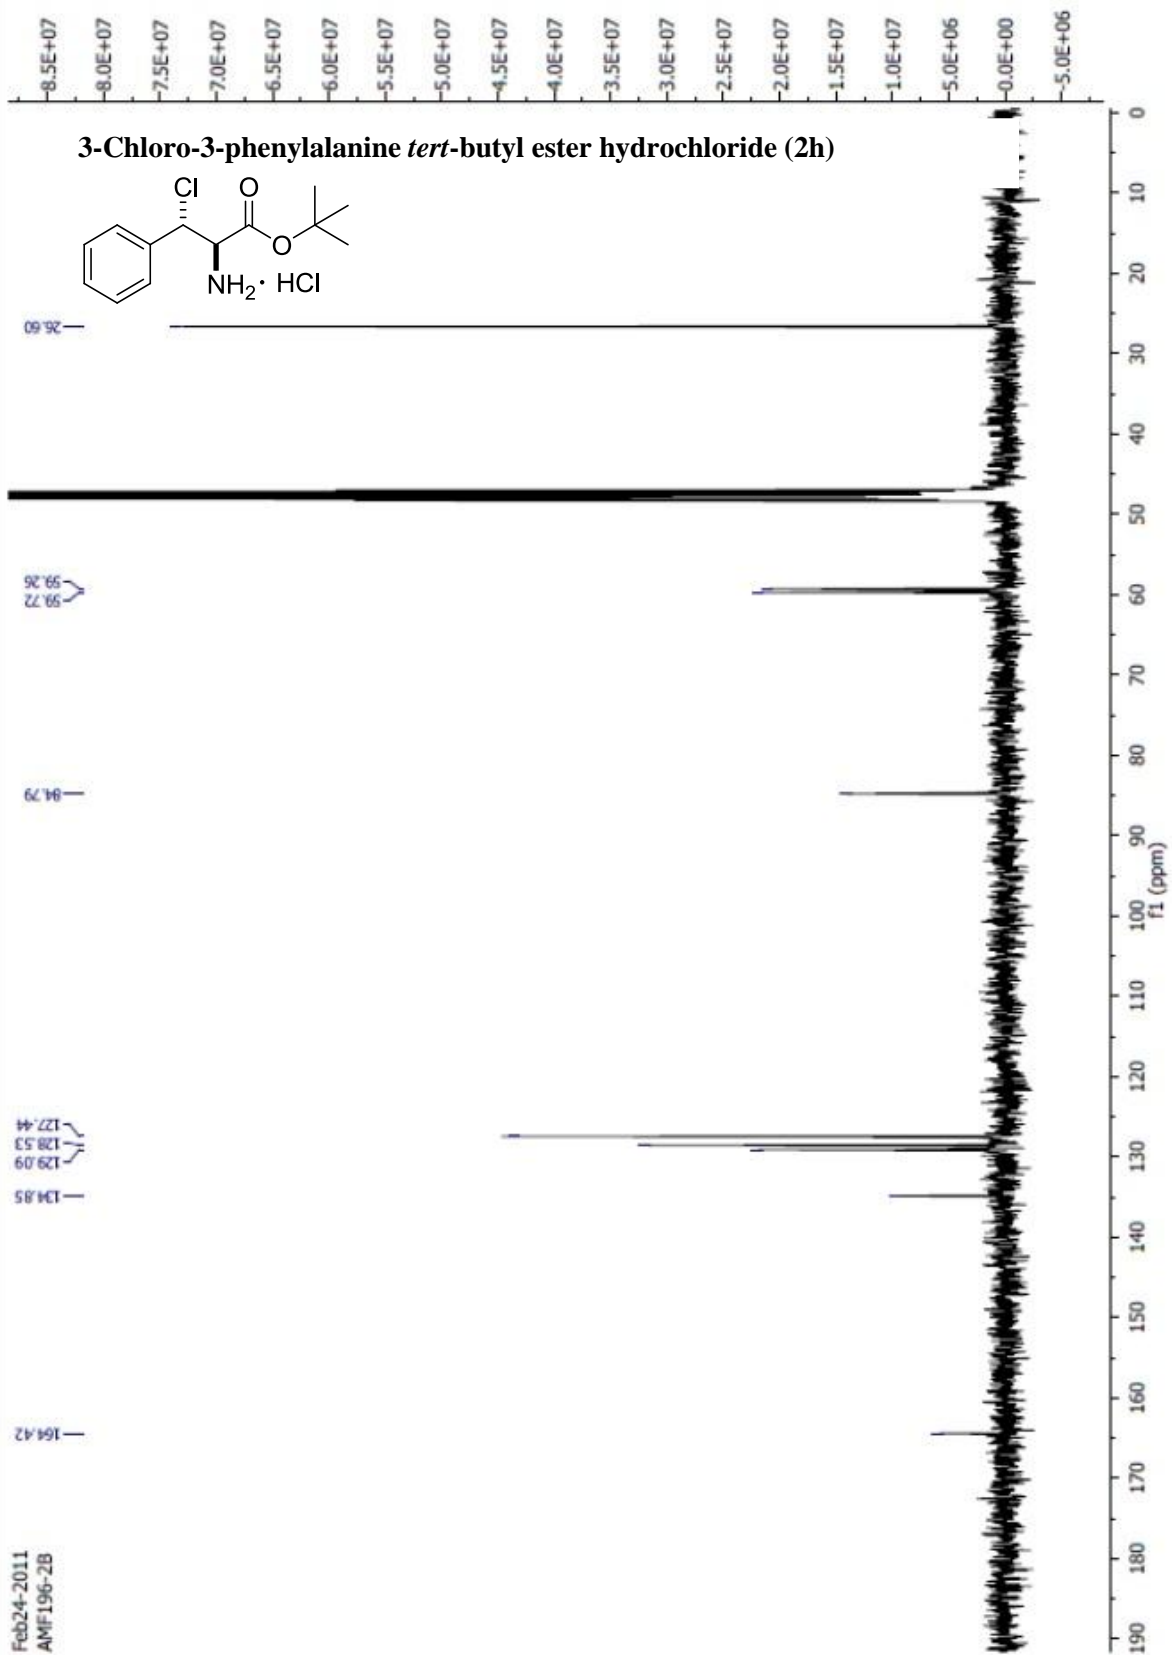

AMF190-2B

# 3-Chloro-3-phenylalanine hydrochloride (2g)

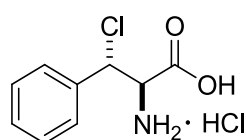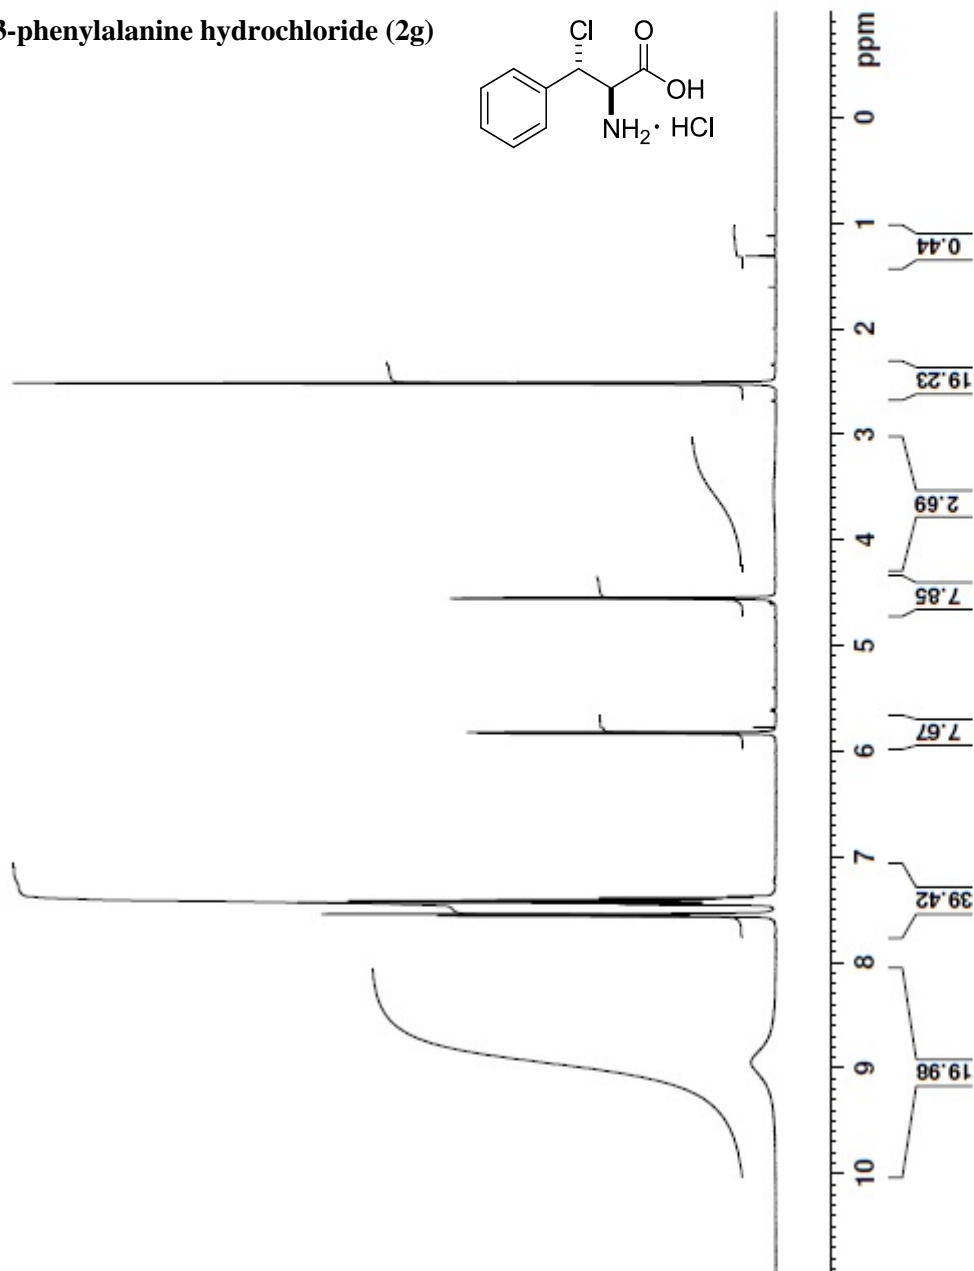

**Av-400C**

NAME Feb03-2011  
 EXPNO 20  
 PROCNO 1  
 Date\_ 20110203  
 Time 13.04  
 INSTRUM spect  
 PROHD 5 mm PABBO BB-  
 PULPROG zg30  
 TD 32768  
 SOLVENT DMSO  
 NS 16  
 DS 2  
 SWH 8012.820 Hz  
 FIDRES 0.244532 Hz  
 AQ 2.0447731 sec  
 RG 362  
 DW 62.400 usec  
 DE 6.00 usec  
 TE 295.9 K  
 D1 1.00000000 sec  
 TD0 1  
 ===== CHANNEL f1 =====  
 NUC1 1H  
 P1 9.80 usec  
 PL1 -3.00 dB  
 PL1W 15.63704205 W  
 SFO1 400.2024012 MHz  
 SI 16384  
 SF 400.2000000 MHz  
 WTW EM  
 SSB 0  
 LB 0.30 Hz  
 GB 0  
 PC 1.00

AMF181-2A

Av-400C

3-Chloro-3-phenylalanine hydrochloride (2g)

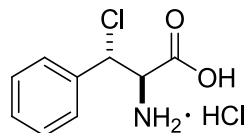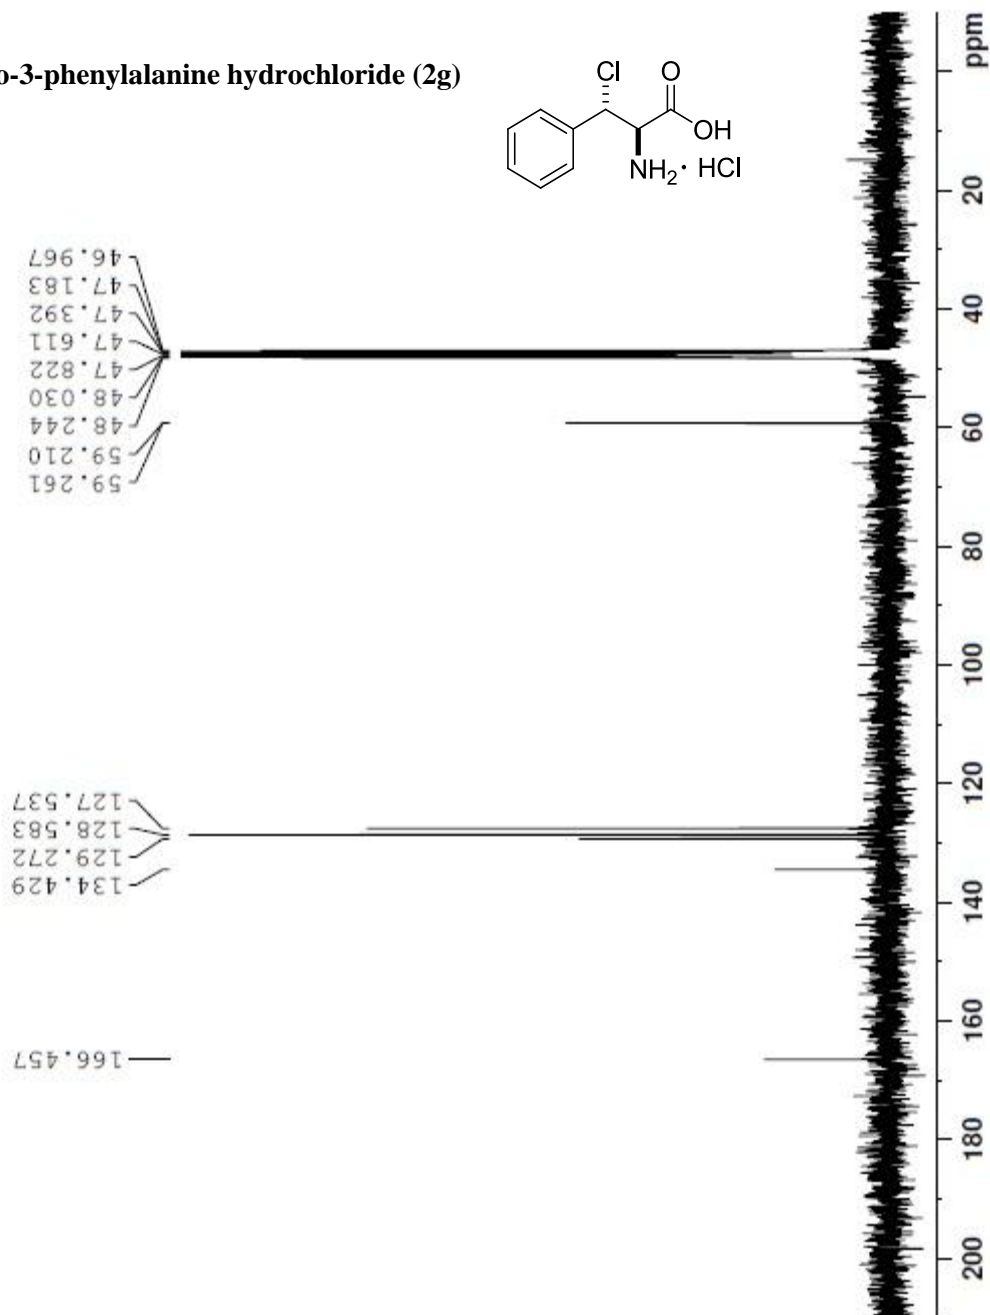

```

NAME      Feb02-2011
EXPNO     30
PROCNO    1
Date_     20110202
Time      9.39
INSTRUM   spect
PROBHD    5 mm F4BBO BB-
PULPROG   zgpg30
TD         32768
SOLVENT   DMSO
NS         320
DS         4
SWH        28409.092 Hz
FIDRES     0.866977 Hz
AQ         0.5767668 sec
RG         2050
DE         17.600 usec
TE         296.6 K
D1         1.00000000 sec
D11        0.03000000 sec
TD0        1

===== CHANNEL F1 =====
NUC1       13C
P1         7.90 usec
PL1        -3.00 dB
PL1W       69.1638425 W
SFO1       100.6214393 MHz

===== CHANNEL F2 =====
CFDPFG2    waltz16
NUC2       1H
PCPD2      100.00 usec
PL2        -3.00 dB
PL12       16.25 dB
PL13       17.00 dB
PL1W       15.63704205 W
PL12W      0.18584658 W
PL13W      0.15637042 W
SFO2       400.2020010 MHz
SI         16384
SF         100.6303700 MHz
WDW        EM
SSB        0
LB         2.00 Hz
GB         0
PC         1.40
  
```

## X-Ray Crystallography

### The X-ray crystal structure of **1a**

Crystal data for **1a**:  $C_{13}H_{17}NO_2$ ,  $M = 219.28$ , monoclinic,  $P2_1/n$  (no. 14),  $a = 5.7745(3)$ ,  $b = 20.4714(8)$ ,  $c = 10.5178(4)$  Å,  $\beta = 98.175(4)^\circ$ ,  $V = 1230.70(9)$  Å<sup>3</sup>,  $Z = 4$ ,  $D_c = 1.183$  g cm<sup>-3</sup>,  $\mu(\text{Mo-K}\alpha) = 0.080$  mm<sup>-1</sup>,  $T = 173$  K, colourless thin plates, Oxford Diffraction Xcalibur 3 diffractometer; 2454 independent measured reflections ( $R_{\text{int}} = 0.0295$ ),  $F^2$  refinement, [10]  $R_1(\text{obs}) = 0.0487$ ,  $wR_2(\text{all}) = 0.1092$ , 1619 independent observed absorption-corrected reflections [ $|F_o| > 4\sigma(|F_o|)$ ],  $2\theta_{\text{max}} = 56^\circ$ , 167 parameters. CCDC 884567.

The N–H proton was located from a  $\Delta F$  map and refined freely subject to an N–H distance constraint of 0.90 Å. The O(11)-bound tert-butyl group was found to be disordered, and two orientations of ca. 84 and 16% occupancy were identified. The geometries of the two orientations were optimised, the thermal parameters of adjacent atoms were restrained to be similar, and only the non-hydrogen atoms of the major occupancy orientation were refined anisotropically (the remainder were refined isotropically).

### Figures

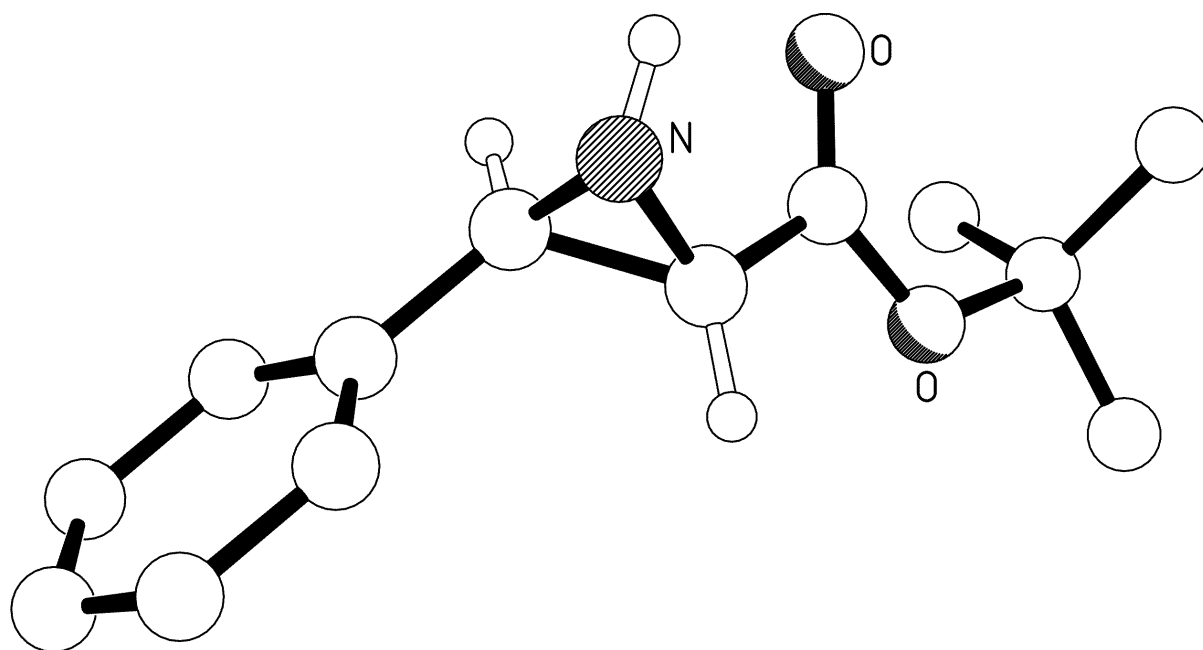

**Figure S1:** The crystal structure of **1a**.

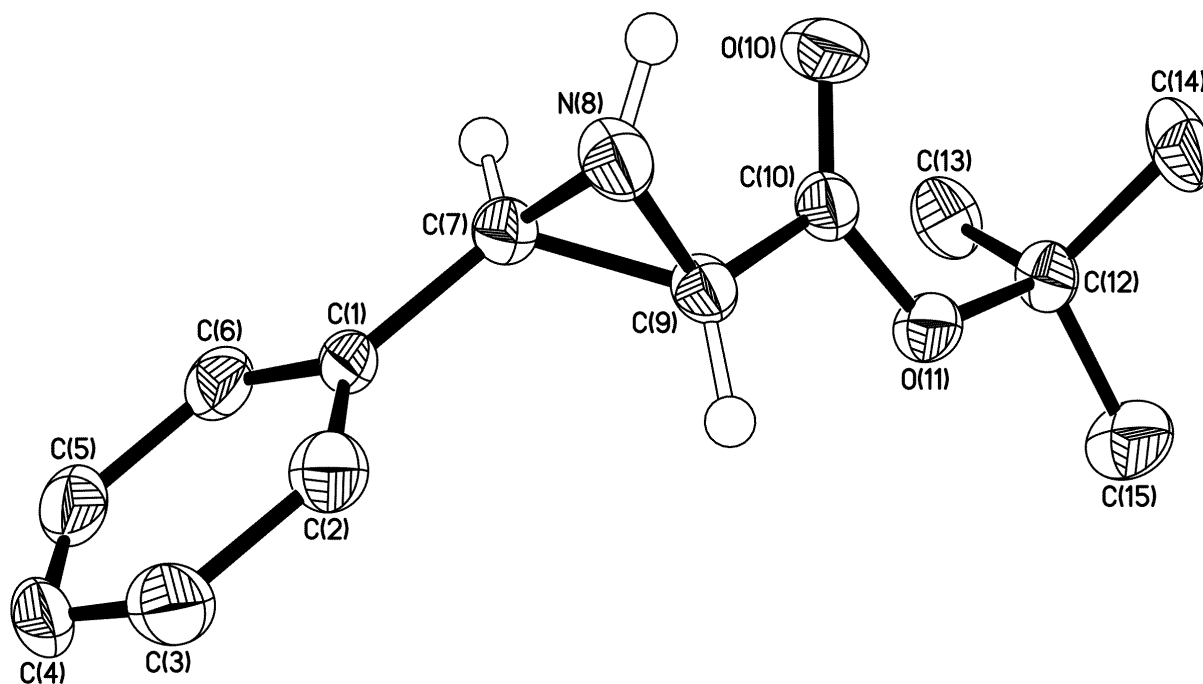

**Figure S2:** The crystal structure of **1a** (50% probability ellipsoids).

## References

1. Claridge, T. D. W.; Davies, S. G.; Lee, J. A.; Nicholson, R. L.; Roberts, P. M.; Russell, A. J.; Smith, A. D.; Toms, S. M., *Org. Lett.* **2008**, 10, 5437–5440.
2. Gillespie, K. M.; Sanders, C. J.; O'Shaughnessy, P.; Westmoreland, I.; Thickitt, C. P.; Scott, P., *J. Org. Chem.* **2002**, 67, 3450–3458.
3. Davies, S. G.; Mulvaney, A. W.; Russell, A. J.; Smith, A. D., *Tetrahedron Asymm.* **2007**, 18, 1554–1566.
4. Paquin, J.-F.; Stephenson, C. R. J.; Defieber, C.; Carreira, E. M., *Org. Lett.* **2005**, 7, 3821–3824.
5. Bull, S. D.; Davies, S. G.; Delgado-Ballester, S.; Kelly, P. M.; Kotchie, L. J.; Gianotti, M.; Laderas, M.; Smith, A. D., *J. Chem. Soc. Perkin Trans. 1* **2001**, 23, 3112–3121.
6. Li, K.; Ran, L.; Yu, Y.-H.; Tang, Y., *J. Org. Chem.* **2004**, 69, 3986–3989.
7. Armstrong, A.; Baxter, C. A.; Lamont, S. G.; Pape, A. R.; Wincewicz, R., *Org. Lett.* **2007**, 9, 351–353.
8. Nemes, C.; Jeannin, L.; Sapi, J.; Laronze, M.; Seghir, H.; Auge, F.; Laronze, J., *Tetrahedron* **2000**, 56, 5479.
9. D'Arrigo, P.; Kanerva, L. T.; Li, X.-G.; Saraceno, C.; Servi, S.; Tessaro, D., *Tetrahedron Asymm.* **2009**, 20, 1641–1645.
10. Sheldrick, G. M. *Acta Cryst.*, **2008**, A64, 112–122.
